# Supplementary material for: A Genomic Approach to Identify Regulatory Nodes in the Transcriptional Network of Systemic Acquired Resistance in Plants
Source: PLOS journal article supplement (doi:10.1371/journal.ppat.0020123), 2006-01-01
Supplement: S3 (10.1371/journal.ppat.0020123.s003) [file journal.ppat.0020123.s003]

Table S3  Genes affected by BTH treatment in WT

Array Element	Locus Identifier	Annotation	8h F. C.	24h F. C.	BTH p-value	NPR1 p-value
245932_at	At5g09290	3'(2'),5'-bisphosphate nucleotidase, putative / inositol polyphosphate 1-phosphatase, putative	3.58	5.85	1.04E-04	9.62E-06
254093_at	At4g25110	latex-abundant family protein (AMC2) / caspase family protein	5.61	6.35	1.04E-04	5.23E-07
257100_at	At3g25010	disease resistance family protein	9.33	22.49	1.04E-04	1.61E-05
263783_at	At2g46400	WRKY family transcription factor	7.93	17.60	1.04E-04	3.32E-06
267496_at	At2g30550	lipase class 3 family protein	2.86	2.90	1.04E-04	9.64E-08
246749_at	At5g27830	expressed protein	2.89	3.54	1.05E-04	2.15E-05
265067_at	At1g03850	glutaredoxin family protein	23.98	49.59	1.50E-04	4.04E-06
265189_at	At1g23840	expressed protein	5.48	6.78	1.50E-04	2.99E-06
248348_at	At5g52190	sugar isomerase (SIS) domain-containing protein	-2.12	-1.87	2.14E-04	5.47E-04
249288_at	At5g41050	expressed protein	-3.30	-3.18	2.14E-04	4.00E-06
255785_at	At1g19920	sulfate adenylyltransferase 2 / ATP-sulfurylase 2 (ASA1) (MET3-1) (APS2)	-2.02	-1.70	2.14E-04	1.16E-06
259757_at	At1g77510	disulfide isomerase-like (PDIL) protein, a member of a multigene family within the thioredoxin (TRX) superfamily.	4.47	7.18	2.14E-04	5.93E-06
253334_at	At4g33360	terpene cyclase/mutase-related	1.96	2.38	2.15E-04	1.15E-06
248944_at	At5g45500	expressed protein	3.17	2.97	2.17E-04	2.41E-06
250775_at	At5g05460	similar to glycosyl hydrolase family 85 protein	3.40	3.33	2.17E-04	7.30E-05
253377_at	At4g33300	disease resistance protein (CC-NBS-LRR class), putative	2.95	3.46	2.17E-04	5.39E-05
254532_at	At4g19660	ankyrin repeat family protein / BTB/POZ domain-containing protein	2.37	2.40	2.17E-04	2.97E-04
257623_at	At3g26210	cytochrome P450 71B23, putative (CYP71B23)	9.63	12.10	2.17E-04	2.45E-04
257745_at	At3g29240	expressed protein	6.76	5.13	2.17E-04	2.58E-07
264371_at	At1g12090	protease inhibitor/seed storage/lipid transfer protein (LTP) family protein	-4.37	-9.62	2.17E-04	1.96E-07
265260_at	At2g43000	no apical meristem (NAM) family protein	6.07	8.53	2.17E-04	3.38E-07
250268_s_at	At5g12950At5g12960	expressed protein, putative secreted protein SCF41.30c	-3.45	-3.02	2.31E-04	2.56E-06
255319_at	At4g04220	disease resistance family protein	5.81	8.04	2.31E-04	2.43E-06
261027_at	At1g01340	cyclic nucleotide-regulated ion channel (CNGC10) (ACBK1)	4.28	6.30	2.31E-04	1.34E-05
262456_at	At1g11260	glucose transporter (STP1)	1.74	2.32	2.31E-04	3.44E-04
264107_s_at	At2g13790At2g13800	leucine-rich repeat family protein / protein kinase family protein	4.47	4.81	2.31E-04	1.61E-05
247740_at	At5g58940	similar to protein kinase family protein	3.10	4.22	2.46E-04	5.77E-05
245200_at	At1g67850	expressed protein	3.13	4.42	2.62E-04	2.66E-05
245840_at	At1g58420	expressed protein	1.22	6.13	2.70E-04	8.36E-03
247314_at	At5g64000	3'(2'),5'-bisphosphate nucleotidase, putative / inositol polyphosphate 1-phosphatase, putative	3.80	22.53	2.70E-04	2.13E-04
252549_at	At3g45860	receptor-like protein kinase, putative	2.80	4.31	2.70E-04	9.03E-05
252862_at	At4g39830	L-ascorbate oxidase, putative	8.85	17.18	2.70E-04	2.99E-06
253063_at	At4g37640	calcium-transporting ATPase 2, plasma membrane-type (ACA2)	2.62	3.28	2.70E-04	2.83E-05
253181_at	At4g35180	amino acid transporter family protein	16.70	20.88	2.70E-04	2.43E-07
246021_at	At5g21100	L-ascorbate oxidase, putative	-3.17	-3.23	2.71E-04	2.50E-05
251705_at	At3g56400	WRKY family transcription factor	3.72	3.20	2.71E-04	1.27E-05
252417_at	At3g47480	calcium-binding EF hand family protein	7.13	19.51	2.71E-04	5.93E-06
253257_at	At4g34390	extra-large guanine nucleotide binding protein, putative / G-protein, putative	2.44	3.66	2.71E-04	1.42E-04
253302_at	At4g33660	expressed protein	-4.67	-3.69	2.71E-04	4.46E-06
254869_at	At4g11890	protein kinase family protein	11.47	19.38	2.71E-04	5.94E-05
255844_at	At2g33580	protein kinase family protein / peptidoglycan-binding LysM domain-containing protein	2.75	4.05	2.71E-04	1.74E-04
260852_at	At1g21900	emp24/gp25L/p24 family protein	2.34	2.95	2.71E-04	4.12E-06
264434_at	At1g10340	ankyrin repeat family protein	7.52	13.92	2.71E-04	1.22E-05
245266_at	At4g17070	expressed protein	2.68	2.84	2.75E-04	1.44E-04
245637_at	At1g25230	purple acid phosphatase family protein	-3.92	-6.62	2.75E-04	4.00E-06
249035_at	At5g44190	myb family transcription factor (GLK2)	-2.22	-2.99	2.75E-04	9.50E-03
250445_at	At5g10760	aspartyl protease family protein	4.72	8.98	2.75E-04	1.48E-04
252168_at	At3g50440	similar to esterase, putative	-5.41	-7.09	2.75E-04	1.16E-06
253702_at	At4g29900	calcium-transporting ATPase, plasma membrane-type, putative / Ca2+-ATPase	2.96	3.34	2.75E-04	4.22E-05
257149_at	At3g27280	prohibitin, putative	1.95	2.30	2.75E-04	2.01E-02
259850_at	At1g72240	expressed protein	1.54	5.46	2.75E-04	4.20E-01
261650_at	At1g27770	calcium-transporting ATPase 1, plasma membrane-type / Ca(2+)-ATPase isoform 1 (ACA1) / plastid envelope ATPase 1 (PEA1)	2.80	4.37	2.75E-04	5.37E-04
255437_at	At4g03060	2-oxoglutarate-dependent dioxygenase, putative (AOP2)	-6.37	-7.04	2.80E-04	3.34E-03
258201_at	At3g13910	expressed protein	2.76	3.44	2.80E-04	6.11E-03
261948_at	At1g64680	expressed protein	-2.63	-2.34	2.80E-04	2.32E-06
254252_at	At4g23310	receptor-like protein kinase, putative	2.21	6.64	2.85E-04	1.33E-05
258609_at	At3g02910	expressed protein	-2.11	-2.65	2.85E-04	1.65E-05
266927_at	At2g45960	plasma membrane intrinsic protein 1B (PIP1B) / aquaporin PIP1.2 (PIP1.2) / transmembrane protein A (TMPA)	-3.41	-3.38	2.85E-04	1.11E-05
254239_at	At4g23400	major intrinsic family protein / MIP family protein	-4.76	-7.19	2.90E-04	2.99E-06
249890_at	At5g22570	WRKY family transcription factor	37.18	32.20	2.94E-04	1.96E-07
255088_at	At4g09350	DNAJ heat shock N-terminal domain-containing protein	-2.70	-2.43	2.94E-04	4.23E-05
255479_at	At4g02380	late embryogenesis abundant 3 family protein / LEA3 family protein	26.65	32.05	2.94E-04	6.89E-05
246009_at	At5g08335	isoprenylcysteine carboxyl methyltransferase family protein / ICMT family protein	1.87	2.10	3.10E-04	1.60E-04
255630_at	At4g00700	C2 domain-containing protein, contains INTERPRO:IPR000008 C2 domain	8.03	26.35	3.10E-04	2.50E-05
264636_at	At1g65490	expressed protein	3.18	4.24	3.10E-04	5.39E-05
248326_at	At5g52820	WD-40 repeat family protein / notchless protein, putative	2.23	2.02	3.22E-04	2.08E-05
248833_at	At5g47120	Bax inhibitor-1 putative / BI-1 putative	2.09	2.42	3.22E-04	2.86E-05
253081_at	At4g36210	expressed protein	2.12	2.33	3.22E-04	1.47E-04
253351_at	At4g33700	CBS domain-containing protein	-1.96	-2.35	3.22E-04	2.99E-06
263957_at	At2g35880	expressed protein	-2.04	-2.18	3.22E-04	3.30E-04
251429_at	At3g60190	dynamin-like protein E (DL1E)	2.12	2.21	3.36E-04	9.38E-05
253046_at	At4g37370	cytochrome P450, putative	9.66	7.37	3.40E-04	3.17E-04
266167_at	At2g38860	proteaseI (pfpI)-like protein (YLS5)	4.04	4.91	3.42E-04	1.81E-05
259752_at	At1g71040	multi-copper oxidase type I family protein	2.25	2.79	3.45E-04	5.58E-05
247571_at	At5g61210	SNAP25 homologous protein SNAP33 (SNAP33) (SNAP33B) / synaptosomal-associated protein SNAP25-like 1 / snap25a	3.04	3.95	3.53E-04	4.04E-05
248321_at	At5g52740	heavy-metal-associated domain-containing protein	6.46	20.73	3.53E-04	1.73E-04
249346_at	At5g40780	lysine and histidine specific transporter, putative	4.32	5.93	3.53E-04	1.09E-04
254975_at	At4g10500	oxidoreductase, 2OG-Fe(II) oxygenase family protein	14.56	60.39	3.53E-04	1.73E-05
255344_s_at	At4g04570At4g04540	protein kinase family protein,	1.81	4.05	3.53E-04	1.17E-03
255967_at	At1g22280	protein phosphatase 2C, putative / PP2C, putative	2.03	2.55	3.53E-04	2.60E-05
260141_at	At1g66350	gibberellin regulatory protein (RGL1)	-3.41	-3.92	3.53E-04	1.31E-05
261692_at	At1g08450	calreticulin 3 (CRT3)	5.24	7.78	3.53E-04	4.04E-05
262162_at	At1g78020	senescence-associated protein-related	-2.31	-2.21	3.53E-04	9.59E-05
266533_s_at	At2g16850At4g35100	plasma membrane intrinsic protein, putative	-4.57	-4.83	3.53E-04	6.94E-06
267246_at	At2g30250	WRKY family transcription factor	3.49	3.90	3.53E-04	6.65E-04
251324_at	At3g61430	plasma membrane intrinsic protein 1A (PIP1A) / aquaporin PIP1.1 (PIP1.1) (AQ1)	-2.75	-3.13	3.59E-04	1.19E-04
265161_at	At1g30900	vacuolar sorting receptor, putative	5.65	12.47	3.68E-04	2.29E-05
247554_at	At5g61010	exocyst subunit EXO70 family protein, leucine zipper-containing protein	4.11	4.89	3.75E-04	1.72E-04
252587_at	At3g45620	transducin family protein / WD-40 repeat family protein	3.09	3.16	3.78E-04	6.89E-05
260899_at	At1g21370	expressed protein	1.88	2.47	3.78E-04	1.01E-04
251406_at	At3g60260	phagocytosis and cell motility protein ELMO1-related	3.20	4.37	3.83E-04	5.04E-05
251633_at	At3g57460	expressed protein	3.75	6.18	3.83E-04	1.22E-05
257297_at	At3g28040	leucine-rich repeat transmembrane protein kinase, putative	-2.33	-2.40	3.83E-04	3.46E-02
267546_at	At2g32680	disease resistance family protein	5.77	11.63	3.83E-04	5.67E-04
253687_at	At4g29520	expressed protein	4.81	7.73	3.85E-04	3.35E-04
251370_at	At3g60450	expressed protein	5.25	5.26	3.90E-04	9.22E-06
260068_at	At1g73805	calmodulin-binding protein	7.84	12.16	3.90E-04	2.77E-05
260648_at	At1g08050	zinc finger (C3HC4-type RING finger) family protein	4.10	6.23	3.90E-04	2.68E-06
261269_at	At1g26690	emp24/gp25L/p24 family protein	2.19	2.35	3.90E-04	2.00E-04
246434_at	At5g17520	root cap 1 (RCP1)	-2.33	-2.79	3.92E-04	2.88E-05
257844_at	At3g28480	oxidoreductase, 2OG-Fe(II) oxygenase family protein	2.86	3.42	3.92E-04	2.78E-05
266342_at	At2g01540	C2 domain-containing protein	2.13	2.65	3.92E-04	3.40E-05
254225_at	At4g23670	major latex protein-related / MLP-related	-3.18	-4.83	3.94E-04	1.96E-07
267293_at	At2g23810	senescence-associated family protein	3.87	4.79	3.94E-04	2.05E-04
251962_at	At3g53420	plasma membrane intrinsic protein 2A (PIP2A) / aquaporin PIP2.1 (PIP2.1)	-5.71	-7.75	4.00E-04	1.68E-06
252886_at	At4g39350	cellulose synthase, catalytic subunit (Ath-A)	-2.22	-1.84	4.00E-04	7.45E-05
256425_at	At1g33560	disease resistance protein (CC-NBS-LRR class), putative	2.34	3.39	4.00E-04	3.02E-04
266001_at	At2g24150	expressed protein	-1.87	-2.18	4.05E-04	9.84E-06
248527_at	At5g50740	copper chaperone (CCH)-related	-2.73	-3.06	4.23E-04	2.76E-03
248971_at	At5g45000	similar to disease resistance protein (TIR class), putative	6.04	5.06	4.34E-04	3.88E-05
254687_at	At4g13770	cytochrome P450 family protein	-2.34	-2.58	4.34E-04	1.21E-04
262671_at	At1g76040	calcium-dependent protein kinase, putative / CDPK, putative	3.42	5.69	4.34E-04	4.90E-04
247151_at	At5g65640	basic helix-loop-helix (bHLH) family protein	-1.97	-2.21	4.41E-04	5.86E-05
251840_at	At3g54960	disulfide isomerase-like (PDIL) protein, a member of a multigene family within the thioredoxin (TRX) superfamily.	3.19	4.56	4.46E-04	1.20E-05
254255_at	At4g23220	protein kinase family protein	7.05	10.95	4.55E-04	9.90E-05
258614_at	At3g02770	dimethylmenaquinone methyltransferase family protein	2.57	2.67	4.55E-04	2.15E-05
263478_at	At2g31880At2g31890	eucine-rich repeat transmembrane protein kinase, putative	5.33	8.89	4.55E-04	1.09E-04
265121_at	At1g62560	flavin-containing monooxygenase family protein / FMO family protein	-3.83	-2.79	4.55E-04	1.31E-05
251954_at	At3g53670	expressed protein	2.53	2.46	4.71E-04	4.06E-04
252602_at	At3g45040	phosphatidate cytidylyltransferase family protein	1.92	2.39	4.71E-04	3.25E-04
254385_s_at	At4g21830At4g21840	methionine sulfoxide reductase domain-containing protein / SeIR domain-containing protein	1.50	10.28	4.71E-04	9.84E-06
257612_at	At3g26600	armadillo/beta-catenin repeat family protein	2.60	2.58	4.71E-04	1.38E-05
263105_at	At2g05320	beta-1,2-N-acetylglucosaminyltransferase II	1.76	2.11	4.71E-04	5.66E-05
264209_at	At1g22740	Ras-related protein (RAB7) / AtRab75 / small GTP-binding protein, putative	-2.65	-3.11	4.71E-04	1.68E-06
254229_at	At4g23610At4g23620	expressed protein	6.80	15.93	4.79E-04	9.99E-06
259354_at	At3g05220	heavy-metal-associated domain-containing protein	-2.17	-2.42	4.83E-04	2.11E-05
252345_at	At3g48640	expressed protein	4.95	11.29	4.87E-04	7.49E-06
267505_at	At2g45560	cytochrome P450 family protein	-2.47	-2.57	4.87E-04	2.99E-05
257909_at	At3g25480	rhodanese-like domain-containing protein	-2.10	-1.72	4.91E-04	1.44E-04
249494_at	At5g39050	transferase family protein	3.63	4.64	4.98E-04	1.55E-04
252060_at	At3g52430	phytoalexin-deficient 4 protein (PAD4)	5.30	12.67	5.01E-04	2.99E-06
264096_at	At1g78995	expressed protein	-2.70	-2.97	5.01E-04	4.13E-05
247407_at	At5g62900	expressed protein	2.13	1.79	5.08E-04	2.69E-04
250625_at	At5g07340	calnexin, putative	2.85	3.66	5.08E-04	1.67E-05
253696_at	At4g29740	FAD-binding domain-containing protein / cytokinin oxidase family protein	1.89	2.33	5.08E-04	7.22E-05
254066_at	At4g25480	the DREB subfamily A-1 of ERF/AP2 transcription factor family (CBF3)	-4.39	-6.67	5.08E-04	3.65E-04
254192_at	At4g23850	long-chain-fatty-acid--CoA ligase / long-chain acyl-CoA synthetase	1.91	2.22	5.08E-04	2.41E-04
255406_at	At4g03450	ankyrin repeat family protein	6.53	10.14	5.10E-04	1.70E-05
264506_at	At1g09560	germin-like protein (GLP4) (GLP5)	3.42	3.12	5.13E-04	8.79E-06
267612_at	At2g26690	nitrate transporter (NTP2)	-4.93	-5.21	5.13E-04	2.15E-05
260562_at	At2g43850	ankyrin protein kinase, putative (APK1)	1.68	2.70	5.16E-04	3.98E-04
257088_at	At3g20510	expressed protein	2.69	2.80	5.29E-04	1.61E-05
245293_at	At4g16660	heat shock protein 70, putative / HSP70, putative	3.45	4.07	5.31E-04	1.48E-05
250014_at	At5g17990	anthranilate phosphoribosyltransferase	2.36	2.92	5.31E-04	1.59E-04
256252_at	At3g11340	UDP-glucoronosyl/UDP-glucosyl transferase family protein	13.81	8.01	5.31E-04	1.46E-05
257510_at	At1g55360	expressed protein	-3.79	-4.10	5.31E-04	2.86E-05
259789_at	At1g29395	stress-responsive protein, putative	-2.51	-5.21	5.31E-04	2.99E-06
247246_at	At5g64620	invertase/pectin methylesterase inhibitor family protein	-1.93	-2.34	5.35E-04	1.32E-04
252977_at	At4g38560	expressed protein	2.10	6.21	5.43E-04	2.50E-05
264351_at	At1g03370	C2 domain-containing protein / GRAM domain-containing protein	2.09	2.32	5.43E-04	3.95E-04
249896_at	At5g22530	expressed protein	2.13	3.78	5.47E-04	4.85E-05
262236_at	At1g48330	expressed protein	-7.81	-11.48	5.47E-04	1.03E-03
246858_at	At5g25930	leucine-rich repeat family protein / protein kinase family protein	4.94	6.34	5.50E-04	1.53E-04
249774_at	At5g24150	squalene monooxygenase 1,1 / squalene epoxidase 1,1 (SQP1,1)	-5.10	-5.56	5.50E-04	4.39E-05
249983_at	At5g18470	curculin-like (mannose-binding) lectin family protein	11.79	20.64	5.50E-04	8.15E-05
253485_at	At4g31800	WRKY family transcription factor	18.46	28.99	5.50E-04	3.10E-05
263574_at	At2g16990	expressed protein	-3.44	-3.64	5.50E-04	7.03E-05
247685_at	At5g59680	leucine-rich repeat protein kinase, putative	3.25	3.65	5.52E-04	3.24E-05
254265_s_at	At4g23140 At4g23160	receptor-like protein kinase 5 (RLK5)	7.11	14.10	5.55E-04	4.67E-03
262237_at	At1g48320	thioesterase family protein	2.94	3.70	5.55E-04	7.15E-05
246029_at	At5g21090	leucine-rich repeat protein, putative	2.01	2.65	5.60E-04	2.12E-05
246231_at	At4g37080	expressed protein	-4.95	-4.57	5.60E-04	1.53E-05
246821_at	At5g26920	similar to calmodulin-binding protein	6.15	11.07	5.60E-04	4.60E-05
247791_at	At5g58710	peptidyl-prolyl cis-trans isomerase, putative / cyclophilin, putative / rotamase, putative (ROC7)	1.97	2.67	5.60E-04	5.90E-05
250264_at	At5g12890	UDP-glucoronosyl/UDP-glucosyl transferase family protein	1.65	2.21	5.60E-04	2.12E-05
255438_at	At4g03070	2-oxoglutarate-dependent dioxygenase (AOP1.2)	-3.36	-3.79	5.60E-04	6.41E-06
258742_at	At3g05800	expressed protein	-4.76	-8.20	5.60E-04	2.50E-05
259489_at	At1g15790	expressed protein	4.71	5.60	5.60E-04	5.89E-06
264987_at	At1g27030	expressed protein	-7.46	-8.85	5.60E-04	1.17E-05
251413_at	At3g60320	expressed protein	-2.19	-2.15	5.67E-04	1.88E-05
257974_at	At3g20820	leucine-rich repeat family protein	-4.31	-5.26	5.67E-04	6.41E-06
266709_at	At2g03120	signal peptide peptidase family protein	1.96	2.40	5.67E-04	2.99E-06
266993_at	At2g39210	nodulin family protein	6.90	10.37	5.67E-04	3.35E-05
252825_at	At4g39890	Ras-related GTP-binding family protein	3.47	4.35	5.74E-04	9.22E-06
251667_at	At3g57150	dyskerin, putative / nucleolar protein NAP57, putative	2.08	2.10	5.77E-04	1.89E-04
251422_at	At3g60540	sec61beta family protein	2.90	6.78	5.81E-04	1.73E-05
260401_at	At1g69840	band 7 family protein	2.53	3.32	5.81E-04	1.89E-04
249693_at	At5g35750	histidine kinase (AHK2)	-2.67	-2.98	5.89E-04	1.72E-03
256366_at	At1g66880	serine/threonine protein kinase family protein	6.75	12.69	5.89E-04	5.56E-03
261986_s_at	At1g33730 At1g33720	cytochrome P450, putative	3.76	11.02	5.89E-04	2.59E-05
263582_at	At2g17120	peptidoglycan-binding LysM domain-containing protein	3.26	3.00	5.89E-04	2.15E-05
266782_at	At2g29120	similar to glutamate receptor family protein	2.73	3.84	5.89E-04	2.46E-04
267034_at	At2g38310	expressed protein	2.16	3.07	5.89E-04	2.14E-05
245388_at	At4g16410 At4g16400	expressed protein	-1.88	-2.03	5.93E-04	3.06E-05
246368_at	At1g51890	leucine-rich repeat protein kinase, putative	5.29	15.73	5.93E-04	1.68E-06
247293_at	At5g64510	expressed protein	4.79	5.88	5.93E-04	2.70E-05
248889_at	At5g46230	expressed protein	5.96	7.50	5.93E-04	2.08E-05
250302_at	At5g11920	glycosyl hydrolase family 32 protein	2.50	8.91	5.93E-04	4.46E-06
250644_at	At5g06750	protein phosphatase 2C family protein / PP2C family protein	3.42	3.52	5.93E-04	2.74E-05
250818_at	At5g04930	phospholipid-transporting ATPase 1 / aminophospholipid flippase 1 / magnesium-ATPase 1 (ALA1)	3.36	3.83	5.93E-04	8.18E-05
250829_at	At5g04720	disease resistance protein (CC-NBS-LRR class), putative	4.01	5.12	5.93E-04	9.42E-05
255793_at	At2g33250	expressed protein	-2.88	-1.98	5.93E-04	3.24E-05
258181_at	At3g21670	nitrate transporter (NTP3)	-5.29	-6.54	5.93E-04	1.53E-05
258956_at	At3g01440	oxygen evolving enhancer 3 (PsbQ) family protein, photosystem II oxygen-evolving complex protein	-5.85	-4.41	5.93E-04	2.56E-06
260490_at	At1g51500	ABC transporter family protein	-1.68	-2.03	5.93E-04	3.29E-04
261247_at	At1g20070	expressed protein	-4.85	-5.18	5.93E-04	2.15E-03
262161_at	At1g52600	signal peptidase, putative	1.96	2.44	5.93E-04	1.19E-04
263688_at	At1g26920	expressed protein	-3.69	-5.95	5.93E-04	9.84E-06
254247_at	At4g23260	protein kinase family protein	1.93	2.74	6.06E-04	2.51E-05
265400_at	At2g10940	protease inhibitor/seed storage/lipid transfer protein (LTP) family protein	-43.48	-48.78	6.06E-04	1.92E-05
245742_at	At1g44170	aldehyde dehydrogenase, putative (ALDH)	-2.54	-2.18	6.15E-04	4.30E-06
257591_at	At3g24900	disease resistance family protein / LRR family protein	3.87	9.85	6.15E-04	5.54E-06
247439_at	At5g62670	ATPase, plasma membrane-type, putative / proton pump, putative	-5.21	-6.85	6.17E-04	3.44E-05
250937_at	At5g03230	expressed protein	-2.94	-4.33	6.18E-04	4.34E-03
255455_at	At4g02930	elongation factor Tu, putative / EF-Tu, putative	2.09	2.33	6.20E-04	5.90E-05
255690_at	At4g00360 At4g00370	cytochrome P450, putative;  sugar transporter family protein	-3.38	-4.83	6.20E-04	2.99E-06
266070_at	At2g18660	expansin family protein (EXPR3)	15.54	45.34	6.24E-04	1.67E-05
252981_at	At4g38260	expressed protein	2.31	2.08	6.26E-04	2.77E-05
257690_at	At3g12830	auxin-responsive family protein	3.70	6.63	6.26E-04	7.80E-05
259852_at	At1g72280	endoplasmic reticulum oxidoreductin 1 (ERO1) family protein	3.92	7.91	6.30E-04	7.07E-05
250272_at	At5g13000	glycosyl transferase family 48 protein	-1.97	-2.32	6.36E-04	1.03E-04
246405_at	At1g57630	disease resistance protein (TIR class), putative	10.23	24.94	6.44E-04	2.68E-05
252446_at	At3g47010	glycosyl hydrolase family 3 protein, beta-D-glucan exohydrolase	2.26	2.38	6.44E-04	1.01E-04
255341_at	At4g04500	protein kinase family protein	2.31	15.47	6.44E-04	2.68E-05
259738_at	At1g64355	expressed protein	-2.45	-2.25	6.44E-04	2.99E-06
266277_at	At2g29310	tropinone reductase, putative	-4.74	-5.29	6.44E-04	4.76E-06
245130_at	At2g45340	leucine-rich repeat transmembrane protein kinase, putative	-4.33	-4.72	6.48E-04	4.28E-04
246510_at	At5g15410	cyclic nucleotide-regulated ion channel / cyclic nucleotide-gated channel (CNGC2)	-3.65	-4.18	6.48E-04	1.17E-05
246988_at	At5g67340	armadillo/beta-catenin repeat family protein / U-box domain-containing protein	4.06	6.35	6.48E-04	2.73E-05
247486_at	At5g62140	expressed protein	-3.33	-3.45	6.48E-04	6.26E-05
248615_at	At5g49570	transglutaminase-like family protein	2.76	2.66	6.48E-04	3.76E-05
249847_at	At5g23210	serine carboxypeptidase S10 family protein	-2.65	-2.13	6.48E-04	1.48E-04
249876_at	At5g23060	expressed protein	-2.61	-3.25	6.48E-04	6.41E-06
250994_at	At5g02490	heat shock cognate 70 kDa protein 2 (HSC70-2)	3.90	5.10	6.48E-04	5.93E-06
253987_at	At4g26270	phosphofructokinase family protein	2.43	2.30	6.48E-04	3.20E-05
255607_at	At4g01130	acetylesterase, putative	-5.10	-3.26	6.48E-04	1.21E-05
256593_at	At3g28510	AAA-type ATPase family protein	8.14	22.31	6.48E-04	1.38E-05
257651_at	At3g16850	glycoside hydrolase family 28 protein / polygalacturonase (pectinase) family protein	-2.58	-3.11	6.48E-04	2.01E-05
258913_at	At3g06450	anion exchange family protein	2.00	2.68	6.48E-04	5.39E-05
260046_at	At1g73800	calmodulin-binding protein	7.62	10.19	6.48E-04	1.37E-05
261059_at	At1g01250	member of the DREB subfamily A-4 of ERF/AP2 transcription factor family	-2.24	-2.58	6.48E-04	2.12E-05
262542_at	At1g34180	no apical meristem (NAM) family protein	2.39	5.01	6.48E-04	1.14E-05
263410_at	At2g04039	expressed protein	-2.05	-1.53	6.48E-04	2.67E-04
263736_at	At1g60000	29 kDa ribonucleoprotein, chloroplast, putative / RNA-binding protein cp29, putative	-2.49	-2.35	6.48E-04	3.33E-05
264355_at	At1g03210	phenazine biosynthesis PhzC/PhzF family protein	3.17	2.99	6.48E-04	1.17E-05
264609_at	At1g04530	expressed protein	1.96	2.19	6.48E-04	5.93E-06
266685_at	At2g19710	expressed protein	1.94	2.10	6.48E-04	6.41E-06
246184_at	At5g20950	glycosyl hydrolase family 3 protein, beta-D-glucan exohydrolase	2.00	2.06	6.50E-04	2.99E-05
247716_at	At5g59350	expressed protein	-3.66	-3.92	6.50E-04	1.09E-04
262177_at	At1g74710	isochorismate synthase 1 (ICS1) / isochorismate mutase	2.69	14.02	6.50E-04	3.86E-06
253167_at	At4g35310	calcium-dependent protein kinase, putative / CDPK, putative	2.21	2.48	6.65E-04	1.66E-04
256527_at	At1g66100	thionin, putative	-4.27	-55.25	6.65E-04	2.99E-06
261130_at	At1g04870	protein arginine N-methyltransferase family protein	2.61	2.25	6.65E-04	1.44E-04
261339_at	At1g35710	leucine-rich repeat transmembrane protein kinase, putative	8.51	11.83	6.65E-04	1.62E-03
264951_at	At1g76970	VHS domain-containing protein / GAT domain-containing protein	3.54	4.55	6.65E-04	1.13E-04
245566_at	At4g14610	disease resistance protein (CC-NBS-LRR class), putative	2.89	4.22	6.70E-04	1.62E-04
260731_at	At1g17500	haloacid dehalogenase-like hydrolase family protein	2.10	1.89	6.70E-04	1.77E-05
262598_at	At1g15260	expressed protein	-2.72	-4.22	6.70E-04	4.04E-06
254862_at	At4g12030	bile acid:sodium symporter family protein	-2.71	-2.92	6.87E-04	2.31E-04
263539_at	At2g24850	aminotransferase, putative	16.01	20.84	6.87E-04	9.84E-06
263852_at	At2g04450	MutT/nudix family protein	9.62	22.45	6.90E-04	7.49E-06
256050_at	At1g07000	exocyst subunit EXO70 family protein	4.02	5.65	6.92E-04	1.01E-04
264360_at	At1g03310	protein with strong similarity to isoamylase (EC:3.2.1.68) however lacks critical residues known to be important for activity	-3.03	-2.99	6.96E-04	6.92E-05
266017_at	At2g18690	expressed protein	6.65	12.00	6.96E-04	4.12E-05
255294_at	At4g04750	sugar transporter family protein	-3.07	-2.44	6.97E-04	2.22E-05
256578_at	At3g28200	peroxidase, putative	-2.30	-2.72	6.97E-04	1.19E-05
249754_at	At5g24530	oxidoreductase, 2OG-Fe(II) oxygenase family protein	7.28	10.79	7.04E-04	1.77E-04
254453_at	At4g21120	amino acid permease family protein	3.10	5.05	7.04E-04	4.04E-06
255818_at	At2g33570	expressed protein	-2.66	-2.06	7.09E-04	9.28E-06
250831_at	At5g04920	vacuolar protein sorting 36 family protein / VPS36 family protein	2.17	2.35	7.11E-04	8.10E-04
251895_at	At3g54420	class IV chitinase (CHIV)	3.59	4.82	7.11E-04	9.80E-05
250475_at	At5g10180	sulfate transporter	-1.81	-2.33	7.17E-04	4.82E-06
253401_at	At4g32870	expressed protein	5.86	6.03	7.45E-04	3.00E-05
249777_at	At5g24210	lipase class 3 family protein	8.85	10.26	7.46E-04	8.71E-05
250627_at	At5g07360	amidase family protein	2.03	1.89	7.47E-04	9.00E-05
251980_at	At3g53270	expressed protein, endopeptidase Clp ATP-binding chain C	1.33	2.27	7.53E-04	3.90E-04
264998_at	At1g67330	expressed protein	2.74	1.90	7.53E-04	2.51E-05
246327_at	At1g16670	protein kinase family protein	2.95	3.12	7.55E-04	4.34E-05
249264_s_at	At5g41750 At5g41740	disease resistance protein (TIR-NBS-LRR class), putative	5.25	7.93	7.55E-04	1.13E-04
249552_s_at	At5g38250 At5g38240	serine/threonine protein kinase, putative	2.03	4.10	7.55E-04	6.69E-06
256431_s_at	At3g11010 At5g27060	disease resistance family protein / LRR family protein	9.58	19.56	7.55E-04	8.52E-04
256013_at	At1g19270	ubiquitin interaction motif-containing protein / LIM domain-containing protein	2.22	2.50	7.60E-04	5.29E-03
255660_at	At4g00755	F-box family protein	-2.70	-3.05	7.63E-04	1.70E-05
254784_at	At4g12720	MutT/nudix family protein	4.35	6.31	7.65E-04	2.88E-05
257432_at	At2g21850	CHP-rich zinc finger protein, putative	2.35	3.32	7.77E-04	4.67E-05
262772_at	At1g13210	haloacid dehalogenase-like hydrolase family protein	2.46	2.93	7.77E-04	7.16E-04
266055_at	At2g40650	pre-mRNA splicing factor PRP38 family protein	1.98	2.05	7.77E-04	1.56E-03
246099_at	At5g20230	plastocyanin-like domain-containing protein	11.46	13.56	7.87E-04	5.87E-05
257101_at	At3g25020	disease resistance family protein	5.73	6.91	7.87E-04	1.52E-04
260590_at	At1g53310	phosphoenolpyruvate carboxylase, putative / PEP carboxylase, putative (PPC1)	1.79	2.10	7.87E-04	5.29E-05
263250_at	At2g31390	pfkB-type carbohydrate kinase family protein	2.08	2.23	7.87E-04	3.13E-04
247450_at	At5g62350	invertase/pectin methylesterase inhibitor family protein / DC 1.2 homolog (FL5-2I22)	-1.96	-2.93	7.92E-04	1.85E-04
252053_at	At3g52400	syntaxin, putative (SYP122)	5.31	8.68	7.92E-04	1.84E-04
254649_at	At4g18570	proline-rich family protein	-2.23	-2.86	7.92E-04	1.38E-04
254660_at	At4g18250	receptor serine/threonine kinase, putative	5.37	8.18	7.92E-04	8.82E-06
265663_at	At2g24290	expressed protein	-2.18	-2.19	7.92E-04	9.84E-06
267142_at	At2g38290	ammonium transporter 2 (AMT2)	2.66	2.89	7.92E-04	5.41E-03
256451_s_at	At1g75170	SEC14 cytosolic factor family protein / phosphoglyceride transfer family protein	2.15	3.86	7.97E-04	8.53E-04
245035_at	At2g26400	acireductone dioxygenase (ARD/ARD') family protein	8.30	21.03	8.06E-04	7.49E-06
247162_at	At5g65730	xyloglucan:xyloglucosyl transferase, putative / xyloglucan endotransglycosylase, putative / endo-xyloglucan transferase, putative	-15.41	-18.80	8.06E-04	1.09E-06
259911_at	At1g72680	cinnamyl-alcohol dehydrogenase, putative	3.36	4.20	8.06E-04	6.63E-05
249775_at	At5g24160	squalene monooxygenase 1,2 / squalene epoxidase 1,2 (SQP1,2)	-3.46	-5.15	8.08E-04	1.13E-04
257137_at	At3g28860	ATP-binding cassette (ABC) transporter	-3.65	-4.93	8.08E-04	2.34E-04
260728_at	At1g48210	serine/threonine protein kinase, putative	2.45	2.33	8.08E-04	8.97E-05
252971_at	At4g38770	proline-rich family protein (PRP4)	-5.35	-13.16	8.13E-04	4.00E-06
254190_at	At4g23885	expressed protein	2.18	4.09	8.13E-04	5.29E-05
254271_at	At4g23150	protein kinase family protein	7.34	23.50	8.13E-04	3.62E-05
256787_at	At3g13790	beta-fructosidase (BFRUCT1) / beta-fructofuranosidase / cell wall invertase	8.82	11.86	8.13E-04	9.53E-05
257708_at	At3g13330	expressed protein	2.51	2.55	8.13E-04	3.08E-04
261892_at	At1g80840	WRKY family transcription factor	16.38	16.53	8.13E-04	1.32E-04
262408_at	At1g34750	protein phosphatase 2C, putative / PP2C, putative	3.76	4.28	8.13E-04	4.67E-05
262926_s_at	At1g65800 At1g65790	S-receptor protein kinase, putative	1.94	2.50	8.13E-04	4.49E-04
263325_at	At2g04240	zinc finger (C3HC4-type RING finger) family protein	-1.47	-2.69	8.13E-04	4.85E-02
266781_at	At2g28940	protein kinase family protein	2.40	2.24	8.13E-04	1.87E-04
249866_at	At5g23010	2-isopropylmalate synthase 3 (IMS3)	-2.75	-2.54	8.15E-04	4.82E-06
248083_at	At5g55420	expressed protein	11.31	11.33	8.22E-04	2.67E-05
265597_at	At2g20142 At2g20145	Toll-Interleukin-Resistance (TIR) domain-containing protein	3.93	8.34	8.23E-04	6.51E-05
250676_at	At5g06310 At5g06320	similar to single-strand telomeric DNA-binding protein; harpin-induced family protein / HIN1 family protein / harpin-responsive family protein / NDR1/HIN1-like protein 3	3.28	4.58	8.30E-04	1.44E-04
257657_at	At3g13235	ubiquitin family protein	2.27	2.32	8.30E-04	4.20E-06
266225_at	At2g28900	mitochondrial import inner membrane translocase subunit Tim17/Tim22/Tim23 family protein	-2.99	-3.42	8.30E-04	4.46E-06
253992_at	At4g26060	expressed protein	3.00	3.33	8.33E-04	4.46E-05
262832_s_at	At1g14870 At1g14880	expressed protein	8.94	9.47	8.33E-04	3.63E-05
248419_at	At5g51550	phosphate-responsive 1 family protein	-2.54	-2.14	8.35E-04	1.68E-06
257939_at	At3g19930	sugar transport protein (STP4)	2.05	4.26	8.44E-04	1.29E-04
262381_at	At1g72900	disease resistance protein (TIR-NBS class), putative	11.47	15.86	8.45E-04	3.32E-03
262539_at	At1g17200	integral membrane family protein	-1.72	-2.12	8.45E-04	1.06E-04
247086_at	At5g66320	zinc finger (GATA type) family protein	2.54	2.97	8.47E-04	2.00E-05
247448_at	At5g62770	expressed protein	4.31	4.42	8.47E-04	4.14E-05
248248_at	At5g53120	spermidine synthase, putative / putrescine aminopropyltransferase, putative	3.37	3.54	8.47E-04	2.39E-05
249918_at	At5g19240	expressed protein	6.80	9.03	8.47E-04	4.14E-05
250435_at	At5g10380	zinc finger (C3HC4-type RING finger) family protein	3.40	8.08	8.47E-04	7.16E-05
250930_at	At5g03160	DNAJ heat shock N-terminal domain-containing protein	3.05	3.44	8.47E-04	4.23E-05
250990_at	At5g02290	protein kinase, putative	2.28	3.11	8.47E-04	1.52E-04
252170_at	At3g50480	broad-spectrum mildew resistance RPW8 family protein	5.70	6.38	8.47E-04	4.34E-05
253950_at	At4g26910	2-oxoacid dehydrogenase family protein	2.17	2.47	8.47E-04	3.27E-05
255739_at	At1g25580	no apical meristem (NAM) family protein	2.16	2.35	8.47E-04	3.76E-05
259385_at	At1g13470	expressed protein	6.57	10.39	8.47E-04	4.22E-05
260601_at	At1g55910	metal transporter, putative (ZIP11)	3.32	3.03	8.47E-04	6.41E-06
264340_at	At1g70280	NHL repeat-containing protein	-3.26	-3.28	8.47E-04	9.58E-04
264909_at	At2g17300	expressed protein	-2.90	-2.43	8.47E-04	2.14E-04
266835_at	At2g29990	pyridine nucleotide-disulphide oxidoreductase family protein	4.34	4.25	8.47E-04	1.33E-04
267189_at	At2g44180	methionyl aminopeptidase, putative / methionine aminopeptidase, putative / peptidase M, putative	2.66	3.02	8.47E-04	5.53E-05
267202_s_at	At2g31020 At2g31030	oxysterol-binding family protein	2.01	2.80	8.47E-04	2.74E-05
267550_at	At2g32800 At2g32810	protein kinase family protein	2.13	3.36	8.47E-04	8.70E-05
251649_at	At3g57330	calcium-transporting ATPase, plasma membrane-type, putative / Ca2+-ATPase, putative (ACA11)	2.62	3.56	8.48E-04	1.04E-03
265993_at	At2g24160	pseudogene, leucine rich repeat protein family	7.11	8.19	8.48E-04	2.53E-03
267381_at	At2g26190	calmodulin-binding family protein	4.18	4.96	8.53E-04	3.24E-04
248981_at	At5g45110	ankyrin repeat family protein / BTB/POZ domain-containing protein	3.33	3.74	8.56E-04	4.65E-04
253776_at	At4g28390	ADP, ATP carrier protein, mitochondrial, putative / ADP/ATP translocase, putative / adenine nucleotide translocator, putative	1.66	4.29	8.63E-04	1.17E-03
262094_at	At1g56110	nucleolar protein Nop56, putative	2.06	2.10	8.63E-04	3.65E-04
257204_at	At3g23805	rapid alkalinization factor (RALF) family protein	-3.58	-3.65	8.72E-04	5.83E-05
248192_at	At5g54140	IAA-amino acid hydrolase, putative (ILL3)	1.97	2.33	8.75E-04	1.01E-04
251306_at	At3g61260	DNA-binding family protein / remorin family protein	-1.88	-2.70	8.75E-04	2.99E-06
251643_at	At3g57550	guanylate kinase 2 (GK-2)	3.04	5.24	8.79E-04	7.38E-05
257313_at	At3g26520	tonoplast intrinsic protein, putative	-4.67	-7.75	8.79E-04	4.00E-06
266905_at	At2g34560	katanin, putative	-3.64	-3.51	8.79E-04	1.27E-05
251790_at	At3g55470	C2 domain-containing protein	2.74	3.59	8.80E-04	4.37E-04
259428_at	At1g01560	mitogen-activated protein kinase, putative / MAPK, putative (MPK11)	5.31	8.31	8.80E-04	1.63E-04
254231_at	At4g23810 At4g23800	WRKY family transcription facto	16.13	22.74	8.85E-04	2.49E-03
258921_at	At3g10500	no apical meristem (NAM) family protein	2.78	3.74	8.85E-04	5.38E-05
267411_at	At2g34930	disease resistance family protein	-1.75	-2.35	8.85E-04	4.75E-03
247570_at	At5g61250	glycosyl hydrolase family 79 N-terminal domain-containing protein	4.61	5.00	8.86E-04	4.22E-05
248327_at	At5g52750	heavy-metal-associated domain-containing protein	9.54	13.15	8.86E-04	4.77E-04
248821_at	At5g47070	protein kinase, putative	4.27	4.63	8.86E-04	3.28E-04
249487_at	At5g39040	ABC transporter (TAP2), TAP-like ABC transporter	2.04	2.52	8.91E-04	1.06E-05
256337_at	At1g72070 At1g72060	DNAJ heat shock N-terminal domain-containing protein	12.42	13.64	8.91E-04	2.46E-04
256877_at	At3g26470	expressed protein	1.83	4.00	8.92E-04	5.93E-06
246993_at	At5g67450	zinc finger (C2H2 type) protein 1 (AZF1)	7.02	9.17	9.05E-04	2.00E-05
254249_at	At4g23280	protein kinase, putative	2.01	2.39	9.05E-04	1.36E-04
260442_at	At1g68220	expressed protein	-2.25	-2.25	9.05E-04	2.03E-05
261443_at	At1g28480	glutaredoxin family protein	24.74	24.22	9.09E-04	7.36E-04
265717_at	At2g03510	band 7 family protein	2.53	2.55	9.12E-04	3.25E-05
246701_at	At5g28020	cysteine synthase, putative / O-acetylserine (thiol)-lyase, putative / O-acetylserine sulfhydrylase, putative	-2.53	-3.18	9.18E-04	2.05E-03
255779_at	At1g18650	glycosyl hydrolase family protein 17	-3.92	-4.65	9.18E-04	1.09E-04
256892_at	At3g19000	oxidoreductase, 2OG-Fe(II) oxygenase family protein	-2.74	-2.18	9.23E-04	5.93E-06
252409_at	At3g47650	bundle-sheath defective protein 2 family / bsd2 family	-2.19	-1.75	9.24E-04	1.01E-04
254211_at	At4g23570	phosphatase-related	4.00	3.86	9.24E-04	3.25E-05
254847_at	At4g11850	phospholipase D gamma 1 / PLD gamma 1 (PLDGAMMA1)	3.53	3.77	9.24E-04	3.56E-04
256883_at	At3g26440	expressed protein	3.08	4.78	9.24E-04	2.93E-05
259793_at	At1g64380	the DREB subfamily A-6 of ERF/AP2 transcription factor family	-3.02	-2.75	9.24E-04	7.82E-04
249652_at	At5g37070	expressed protein	1.94	2.03	9.28E-04	1.04E-03
259272_at	At3g01290	band 7 family protein	13.37	14.99	9.28E-04	7.81E-05
259431_at	At1g01620	plasma membrane intrinsic protein 1C (PIP1C) / aquaporin PIP1.3 (PIP1.3) / transmembrane protein B (TMPB)	-5.10	-7.58	9.28E-04	4.00E-06
259841_at	At1g52200	expressed protein	5.32	5.82	9.28E-04	5.46E-04
267028_at	At2g38470	WRKY family transcription factor	6.81	7.90	9.28E-04	4.98E-04
247137_at	At5g66210	calcium-dependent protein kinase family protein / CDPK family protein	2.35	3.55	9.33E-04	6.85E-04
248932_at	At5g46050	proton-dependent oligopeptide transport (POT) family protein	5.25	14.74	9.33E-04	3.93E-05
249037_at	At5g44130	fasciclin-like arabinogalactan-protein, putative	-2.88	-2.73	9.33E-04	2.71E-05
255895_at	At1g18020 At1g17990	12-oxophytodienoate reductase, putative	2.90	2.27	9.33E-04	3.10E-04
263584_at	At2g17040	no apical meristem (NAM) family protein	7.08	15.73	9.33E-04	1.71E-03
266238_at	At2g29400	serine/threonine protein phosphatase PP1 isozyme 1 (TOPP1) / phosphoprotein phosphatase 1	1.95	2.13	9.33E-04	6.31E-04
247618_at	At5g60280	lectin protein kinase family protein	1.72	4.73	9.37E-04	1.46E-05
248007_at	At5g56260	dimethylmenaquinone methyltransferase family protein	2.03	2.18	9.37E-04	3.81E-04
251107_at	At5g01610	expressed protein	2.16	3.06	9.37E-04	1.22E-05
252116_at	At3g51510	expressed protein	-1.70	-2.25	9.37E-04	6.03E-05
245876_at	At1g26230	chaperonin, putative	-3.53	-4.33	9.39E-04	1.87E-05
247558_at	At5g61060	histone deacetylase family protein	2.08	2.38	9.39E-04	1.61E-03
249417_at	At5g39670 At5g39680	calcium-binding EF hand family protein	8.66	32.08	9.39E-04	5.91E-05
252131_at	At3g50930	AAA-type ATPase family protein	6.86	17.02	9.39E-04	5.63E-04
256277_at	At3g12120	omega-6 fatty acid desaturase, endoplasmic reticulum (FAD2) / delta-12 desaturase	-2.34	-3.10	9.39E-04	2.96E-05
259213_at	At3g09010	protein kinase family protein	3.25	4.05	9.40E-04	1.45E-04
245365_at	At4g17720	RNA recognition motif (RRM)-containing protein	2.75	3.28	9.44E-04	8.43E-05
252921_at	At4g39030	disease susceptibility 5 (EDS5) / salicylic acid induction deficient 1 (SID1)	4.54	6.56	9.44E-04	2.74E-05
255912_at	At1g66960	lupeol synthase, putative / 2,3-oxidosqualene-triterpenoid cyclase, putative	3.15	15.41	9.44E-04	1.92E-05
258175_at	At3g21640	FKBP-type peptidyl-prolyl cis-trans isomerase family protein	2.23	2.45	9.44E-04	6.03E-05
258735_at	At3g05880	hydrophobic protein (RCI2A) / low temperature and salt responsive protein (LTI6A) protein RCI2A (Low temperature and salt responsive protein LTI6A)	-2.65	-2.80	9.44E-04	2.50E-05
259065_at	At3g07520	glutamate receptor family protein (GLR1.4)	1.91	4.14	9.44E-04	7.03E-05
267064_at	At2g41110	calmodulin-2/3/5 (CAM2) (CAL1)	2.81	4.31	9.44E-04	2.18E-04
251847_at	At3g54640	tryptophan synthase, alpha subunit (TSA1)	3.44	3.94	9.47E-04	3.13E-05
258528_at	At3g06770	glycoside hydrolase family 28 protein / polygalacturonase (pectinase) family protein	-3.15	-3.29	9.49E-04	2.69E-04
252068_at	At3g51440	strictosidine synthase family protein	4.51	6.83	9.52E-04	1.53E-05
267288_at	At2g23680	stress-responsive protein, putative	4.54	4.50	9.52E-04	5.07E-05
253849_at	At4g28080	expressed protein	-3.91	-2.92	9.58E-04	2.84E-05
258537_at	At3g04210	disease resistance protein (TIR-NBS class), putative	2.50	2.28	9.58E-04	7.48E-05
260904_at	At1g02450	NPR1/NIM1-interacting protein 1 (NIMIN-1)	23.58	23.63	9.58E-04	2.60E-05
264592_at	At2g17720	oxidoreductase, 2OG-Fe(II) oxygenase family protein	2.65	2.96	9.58E-04	3.66E-05
248134_at	At5g54860	integral membrane transporter family protei	5.29	5.92	9.63E-04	3.68E-05
252010_at	At3g52740	expressed protein	-2.03	-2.27	9.63E-04	1.04E-03
245748_at	At1g51140	basic helix-loop-helix (bHLH) family protein	-1.74	-2.41	9.67E-04	2.07E-04
251970_at	At3g53150	UDP-glucoronosyl/UDP-glucosyl transferase family protein	1.19	2.50	9.69E-04	1.50E-05
245956_s_at	At5g42020 At5g28540	luminal binding protein 2 (BiP-2) (BP2)	5.24	6.55	9.79E-04	7.07E-05
246550_at	At5g14920	gibberellin-regulated family protein	-3.97	-4.61	9.79E-04	2.25E-05
248094_at	At5g55220	trigger factor type chaperone family protein	-2.92	-2.77	9.79E-04	3.29E-04
250575_at	At5g08240	expressed protein	4.37	5.96	9.79E-04	4.06E-05
254500_at	At4g20110	vacuolar sorting receptor, putative	5.09	5.23	9.79E-04	5.02E-05
262082_s_at	At1g56140 At1g56130 At1g56120	leucine-rich repeat family protein / protein kinase family protein	3.87	5.34	9.79E-04	5.93E-06
264130_at	At1g79160	expressed protein	-1.85	-3.57	9.79E-04	5.35E-03
264300_at	At1g78670	gamma-glutamyl hydrolase, putative / gamma-Glu-X carboxypeptidase, putative / conjugase, putative	-1.77	-2.96	9.79E-04	7.43E-06
246488_at	At5g16010	3-oxo-5-alpha-steroid 4-dehydrogenase family protein / steroid 5-alpha-reductase family protein	-1.83	-2.07	9.85E-04	1.48E-05
266482_at	At2g47640	small nuclear ribonucleoprotein D2, putative / snRNP core protein D2, putative / Sm protein D2, putative	2.11	2.25	9.85E-04	3.78E-02
247478_at	At5g62360	invertase/pectin methylesterase inhibitor family protein	-7.04	-10.03	9.88E-04	2.99E-05
248169_at	At5g54610	ankyrin repeat family protein	6.85	5.69	9.88E-04	6.50E-05
254238_at	At4g23540	expressed protein	2.48	2.06	9.88E-04	8.63E-05
262455_at	At1g11310	seven transmembrane MLO family protein / MLO-like protein 2 (MLO2)	2.20	1.88	1.00E-03	9.46E-05
262504_at	At1g21750	disulfide isomerase-like (PDIL) protein, a member of a multigene family within the thioredoxin (TRX) superfamily	2.55	3.38	1.00E-03	3.59E-05
263804_at	At2g40270	protein kinase family protein	1.88	2.20	1.00E-03	6.94E-04
267265_at	At2g22980	similar to serine carboxypeptidase S10 family protei	-6.62	-7.63	1.00E-03	4.15E-05
248381_at	At5g51830	pfkB-type carbohydrate kinase family protein	3.89	4.27	1.01E-03	1.44E-04
264250_at	At1g78680	gamma-glutamyl hydrolase (GGH1) / gamma-Glu-X carboxypeptidase / conjugase	-2.81	-3.38	1.01E-03	3.47E-05
249321_at	At5g40920	disease resistance protein (TIR-NBS-LRR class), putative	1.83	2.34	1.02E-03	1.25E-02
255039_at	At4g09570	calcium-dependent protein kinase, putative / CDPK, putative	1.94	3.02	1.02E-03	1.24E-05
249550_at	At5g38210	serine/threonine protein kinase family protein	2.14	4.20	1.03E-03	2.15E-04
261084_at	At1g07440	tropinone reductase, putative / tropine dehydrogenase, putative	-2.60	-2.54	1.03E-03	1.73E-05
245329_at	At4g14365	zinc finger (C3HC4-type RING finger) family protein / ankyrin repeat family protein	10.54	16.82	1.04E-03	1.41E-03
248322_at	At5g52760	heavy-metal-associated domain-containing protein	29.96	66.29	1.04E-03	2.42E-04
248461_s_at	At2g47510 At5g50950	fumarate hydratase, putative / fumarase, putative	-3.16	-3.70	1.04E-03	1.46E-05
258608_at	At3g03020	expressed protein	1.92	2.84	1.04E-03	2.67E-04
261196_at	At1g12860	basic helix-loop-helix (bHLH) family protein / F-box family protein	-2.08	-2.02	1.04E-03	7.52E-04
262871_at	At1g65010	expressed protein, similar to endosome-associated protein	-3.44	-3.26	1.04E-03	1.35E-03
254305_at	At4g22200	potassium channel protein 2 (AKT2) (AKT3)	-3.88	-3.85	1.05E-03	1.82E-05
265894_at	At2g15050	lipid transfer protein, putative	-1.97	-3.42	1.05E-03	2.07E-04
266324_at	At2g46710	rac GTPase activating protein, putative	-4.52	-8.47	1.05E-03	1.14E-04
266746_s_at	At2g02930 At4g02520	glutathione S-transferase, putative	4.19	4.16	1.06E-03	5.85E-03
262897_at	At1g59840	expressed protein	-2.68	-3.14	1.07E-03	2.08E-05
251996_at	At3g52840	beta-galactosidase, putative / lactase, putative	-4.18	-3.77	1.08E-03	1.22E-05
258351_at	At3g17700	cyclic nucleotide-binding transporter 1 / CNBT1 (CNGC20)	2.15	2.37	1.08E-03	1.38E-02
258947_at	At3g01830	calmodulin-related protein, putative	5.72	23.40	1.08E-03	9.18E-05
261506_at	At1g71697	choline kinase, putative	2.89	3.37	1.08E-03	1.28E-03
261719_at	At1g18380	expressed protein	3.56	4.12	1.08E-03	2.01E-04
262232_at	At1g68600	expressed protein	-2.28	-2.66	1.08E-03	1.36E-04
245761_at	At1g66890	expressed protein	-1.58	-2.26	1.09E-03	2.90E-04
247284_at	At5g64410	oligopeptide transporter OPT family protein	1.73	5.93	1.09E-03	3.28E-04
248263_at	At5g53370	pectinesterase family protein	2.37	2.99	1.09E-03	4.98E-04
252048_at	At3g52500	aspartyl protease family protein	-3.48	-3.46	1.09E-03	2.50E-05
253865_at	At4g27470	zinc finger (C3HC4-type RING finger) family protein	2.04	1.57	1.09E-03	6.98E-04
257625_at	At3g26230	cytochrome P450 family protein	1.83	2.63	1.09E-03	1.27E-05
258350_at	At3g17510	CBL-interacting protein kinase 1 (CIPK1)	-2.59	-2.43	1.09E-03	4.06E-05
260089_at	At1g73170	expressed protein	-1.99	-2.20	1.09E-03	8.62E-04
261480_at	At1g14280	phytochrome kinase, putative	-4.12	-7.04	1.09E-03	4.82E-06
264867_at	At1g24150	formin homology 2 domain-containing protein / FH2 domain-containing protein	2.96	6.40	1.09E-03	3.76E-05
264936_at	At1g61140	SNF2 domain-containing protein / helicase domain-containing protein / zinc finger protein-related	1.80	2.28	1.09E-03	3.50E-04
265182_at	At1g23740	oxidoreductase, zinc-binding dehydrogenase family protein	-2.83	-2.11	1.09E-03	3.05E-05
265880_at	At2g42300	basic helix-loop-helix (bHLH) family protein	-2.43	-1.96	1.09E-03	5.01E-03
245051_at	At2g23320	WRKY family transcription factor	2.88	3.17	1.10E-03	3.69E-03
245340_at	At4g14420	lesion inducing protein-related	2.24	2.58	1.10E-03	2.41E-05
249639_at	At5g36930	disease resistance protein (TIR-NBS-LRR class)	2.12	2.64	1.10E-03	1.40E-03
250598_at	At5g07690	myb family transcription factor (MYB29)	-2.38	-2.30	1.10E-03	1.27E-03
255798_at	At2g33255	haloacid dehalogenase-like hydrolase family protein	-2.20	-2.20	1.10E-03	8.92E-05
257185_at	At3g13100	ABC transporter family protein	1.41	3.27	1.10E-03	7.64E-05
258275_at	At3g15760	expressed protein	4.56	4.95	1.10E-03	3.20E-04
265066_at	At1g03870	fasciclin-like arabinogalactan-protein (FLA9)	-4.85	-2.94	1.10E-03	1.31E-05
265661_at	At2g24360	serine/threonine/tyrosine kinase, putative	2.19	2.15	1.10E-03	7.64E-05
266329_at	At2g01590	expressed protein	-3.97	-3.98	1.10E-03	1.65E-05
248945_at	At5g45510	leucine-rich repeat family protein	2.71	2.63	1.11E-03	9.96E-05
250776_at	At5g05320	monooxygenase, putative (MO3)	2.97	2.81	1.11E-03	9.64E-05
252278_at	At3g49530	no apical meristem (NAM) family protein	1.74	2.29	1.11E-03	4.17E-03
256874_at	At3g26320	cytochrome P450 71B36, putative (CYP71B36)	1.10	2.83	1.11E-03	1.73E-04
259559_at	At1g21240	wall-associated kinase, putative	7.49	22.27	1.11E-03	3.25E-05
260396_at	At1g69720	heme oxygenase 3 (HO3)	1.84	2.47	1.11E-03	9.43E-03
245127_at	At2g47600	magnesium/proton exchanger (MHX1)	-2.34	-2.43	1.12E-03	5.39E-05
252136_at	At3g50770	calmodulin-related protein	1.52	4.96	1.12E-03	1.46E-05
249021_at	At5g44820	expressed protein	1.90	2.74	1.13E-03	7.55E-03
250261_at	At5g13400	proton-dependent oligopeptide transport (POT) family protein	-4.20	-4.76	1.13E-03	1.21E-05
264648_at	At1g09080	luminal binding protein 3 (BiP-3) (BP3)	1.48	8.42	1.13E-03	5.34E-04
245052_at	At2g26440	pectinesterase family protein	4.56	5.10	1.14E-03	3.74E-04
247600_at	At5g60890	receptor-like protein kinase (ATR1) (MYB34)	-3.24	-4.00	1.14E-03	2.02E-05
260954_at	At1g06130	hydroxyacylglutathione hydrolase, putative / glyoxalase II, putative	2.17	2.20	1.14E-03	9.17E-05
247899_at	At5g57345	expressed protein	-2.07	-2.16	1.15E-03	3.22E-02
253147_at	At4g35600	protein kinase family protein	2.32	3.34	1.15E-03	1.25E-02
263807_at	At2g04400	indole-3-glycerol phosphate synthase (IGPS)	2.74	2.85	1.15E-03	2.65E-05
253993_at	At4g26070	mitogen-activated protein kinase kinase (MAPKK) (MKK1) (MEK1)	2.75	2.39	1.16E-03	2.27E-04
254938_at	At4g10770	oligopeptide transporter OPT family protein	-2.21	-1.78	1.16E-03	2.38E-03
261485_at	At1g14360	UDP-galactose/UDP-glucose transporter, putative	4.86	5.66	1.16E-03	1.13E-04
266956_at	At2g34510	expressed protein	-2.90	-2.75	1.17E-03	1.31E-05
249841_at	At5g23520	expressed protein	2.09	2.34	1.18E-03	6.56E-04
252983_at	At4g37980	mannitol dehydrogenase, putative (ELI3-1)	-1.82	-2.82	1.18E-03	2.65E-05
263951_at	At2g35960	harpin-induced family protein / HIN1 family protein / harpin-responsive family protein	-3.28	-2.94	1.18E-03	8.43E-05
264902_at	At1g23060	expressed protein	-1.59	-2.41	1.18E-03	2.83E-01
263096_at	At2g16060	non-symbiotic hemoglobin 1 (HB1) (GLB1)	2.89	2.12	1.19E-03	2.63E-03
266761_at	At2g47130	short-chain dehydrogenase/reductase (SDR) family protein	8.51	8.18	1.20E-03	1.76E-04
246524_at	At5g15860	expressed protein	2.25	2.78	1.21E-03	5.91E-05
256633_at	At3g28340	galactinol synthase, putative	2.46	5.01	1.21E-03	3.59E-04
246150_at	At5g19930	integral membrane family protein	2.38	2.58	1.23E-03	4.65E-04
246518_at	At5g15770	GCN5-related N-acetyltransferase (GNAT) family protein	-2.09	-1.53	1.23E-03	5.33E-04
251028_at	At5g02230	haloacid dehalogenase-like hydrolase family protein	-5.15	-4.83	1.23E-03	2.86E-05
256441_at	At3g10940	protein phosphatase-related	-3.56	-3.82	1.23E-03	1.51E-05
256755_at	At3g25600	calmodulin, putative	2.01	3.25	1.23E-03	7.18E-04
257228_at	At3g27890	NADPH-dependent FMN reductase family protein	2.08	1.95	1.23E-03	1.09E-04
252346_at	At3g48650	At14a-related protein	7.74	11.19	1.24E-03	6.49E-05
257038_at	At3g19260	longevity-assurance (LAG1) family protein	2.15	2.43	1.24E-03	6.17E-05
245367_at	At4g16265	DNA-directed RNA polymerase II, putative	2.20	1.93	1.25E-03	3.56E-03
250301_at	At5g11970	expressed protein	2.23	2.89	1.25E-03	5.31E-04
258140_at	At3g24503	aldehyde dehydrogenase (ALDH1a)	1.63	2.00	1.25E-03	3.28E-05
246041_at	At5g19290	esterase/lipase/thioesterase family protein	-2.27	-2.43	1.26E-03	2.70E-04
262374_s_at	At1g72910At1g72930	disease resistance protein (TIR-NBS class), putative, domain signature TIR-NBS	2.99	4.05	1.26E-03	3.97E-04
253414_at	At4g33050	calmodulin-binding family protein	5.24	6.97	1.27E-03	4.14E-04
262593_at	At1g15120	ubiquinol-cytochrome C reductase complex 7.8 kDa protein, putative / mitochondrial hinge protein, putative	1.92	2.15	1.27E-03	8.46E-03
250739_at	At5g05740	S2P-like putative metalloprotease, also contain transmembrane helices near their C-terminus	-3.51	-3.17	1.28E-03	2.16E-04
255508_at	At4g02220	zinc finger (MYND type) family protein / programmed cell death 2 C-terminal domain-containing protein	3.04	2.63	1.28E-03	5.66E-05
255652_at	At4g00950	expressed protein	-2.82	-3.53	1.28E-03	1.22E-05
257598_at	At3g24800	PRT1 protein (PRT1), E3, N-end rule ubiquitin ligase	-2.01	-2.20	1.28E-03	8.86E-04
258744_at	At3g05830	alpha-helical IF (intermediate filament)-like protein.	1.63	2.12	1.28E-03	6.65E-04
261203_at	At1g12845	expressed protein	-12.66	-20.75	1.28E-03	3.20E-05
264382_at	At2g25110	MIR domain-containing protein	3.24	4.00	1.28E-03	1.14E-05
250281_at	At5g13240	expressed protein	-1.69	-2.21	1.29E-03	3.72E-04
251475_at	At3g59660	C2 domain-containing protein / GRAM domain-containing protein	2.08	2.52	1.29E-03	6.39E-05
259955_s_at	At1g75080 At1g19350	brassinosteroid signalling positive regulator (BZR1)	-2.43	-2.43	1.29E-03	2.68E-05
260772_at	At1g49050	aspartyl protease family protein	3.22	3.39	1.29E-03	1.92E-05
245175_at	At2g47470	protein disulfide isomerase-like (PDIL) protein	3.04	3.20	1.30E-03	1.33E-05
252126_at	At3g50960 At3g50950	disease resistance protein (CC-NBS-LRR class), putative	2.29	2.44	1.30E-03	2.14E-03
254262_at	At4g23470	hydroxyproline-rich glycoprotein family protein	3.43	3.46	1.30E-03	1.24E-04
267300_at	At2g30140	UDP-glucoronosyl/UDP-glucosyl transferase family protein	7.99	12.59	1.30E-03	7.41E-04
246651_at	At5g35170	adenylate kinase family protein	-2.00	-2.57	1.31E-03	1.61E-03
247816_at	At5g58260	subunit NDH-N of NAD(P)H:plastoquinone dehydrogenase complex (Ndh complex) present in the thylakoid membrane of chloroplasts	-3.69	-2.82	1.31E-03	1.54E-05
250796_at	At5g05300	expressed protein	5.02	8.31	1.31E-03	6.50E-05
251227_at	At3g62700	glutathione-conjugate transporter, putative	-2.54	-3.73	1.31E-03	3.95E-04
254076_at	At4g25340	immunophilin-related / FKBP-type peptidyl-prolyl cis-trans isomerase-related	1.73	2.01	1.31E-03	3.66E-05
255340_at	At4g04490	protein kinase family protein	4.57	11.65	1.31E-03	1.76E-04
262878_at	At1g64770	expressed protein	-2.52	-2.12	1.31E-03	7.75E-05
263274_at	At2g11520	protein kinase family protein	1.69	2.14	1.31E-03	2.20E-03
265658_at	At2g13810	aminotransferase class I and II family protein	1.94	4.19	1.31E-03	4.34E-05
247864_s_at	At1g25155 At5g57890 At1g25083 At1g24909 At1g24807 At1g25220	anthranilate synthase beta subunit, putative	3.44	3.36	1.32E-03	3.84E-05
267357_at	At2g40000	expressed protein	8.48	5.80	1.32E-03	1.82E-03
254387_at	At4g21850	methionine sulfoxide reductase domain-containing protein / SeIR domain-containing protein	2.00	7.57	1.33E-03	3.31E-05
246789_at	At5g27600	AMP-binding protein, putative	2.53	2.10	1.34E-03	8.46E-04
250569_at	At5g08130	basic helix-loop-helix (bHLH) family protein	-2.10	-2.79	1.34E-03	1.82E-02
251182_at	At3g62600	DNAJ heat shock family protein	4.80	5.93	1.34E-03	2.86E-05
252310_at	At3g49350	RabGAP/TBC domain-containing protein	2.22	2.60	1.34E-03	3.93E-05
253284_at	At4g34150	C2 domain-containing protein	3.89	4.22	1.34E-03	5.20E-04
256647_at	At3g13610	oxidoreductase, 2OG-Fe(II) oxygenase family protein	2.86	5.84	1.34E-03	1.30E-05
259786_at	At1g29660	GDSL-motif lipase/hydrolase family protein	-6.25	-6.99	1.34E-03	1.50E-05
264672_at	At1g09750	chloroplast nucleoid DNA-binding protein-related	-20.58	-18.73	1.34E-03	4.25E-05
252754_at	At3g43510	copia-like retrotransposon family	2.22	2.31	1.35E-03	6.50E-04
263776_s_at	At2g46430 At2g46440	cyclic nucleotide-regulated ion channel / cyclic nucleotide-gated channel (CNGC3)	2.19	2.39	1.35E-03	9.41E-04
263912_at	At2g36390	1,4-alpha-glucan branching enzyme / starch branching enzyme class II (SBE2-1)	-2.17	-2.40	1.35E-03	1.42E-04
248028_at	At5g55620	expressed protein	-2.11	-3.07	1.36E-03	6.35E-04
250289_at	At5g13190	expressed protein	2.43	3.49	1.36E-03	3.29E-04
254289_at	At4g22980	expressed protein	3.38	3.95	1.36E-03	1.22E-04
255504_at	At4g02200	drought-responsive family protein	2.06	2.61	1.36E-03	1.37E-03
259626_at	At1g42990	AtbZIP60 consists of a bZIP DNA binding domain followed by a putative transmembrane domain	2.39	3.28	1.36E-03	8.34E-04
259764_at	At1g64280	regulatory protein (NPR1)	2.14	2.17	1.36E-03	4.90E-05
260211_at	At1g74440	expressed protein	2.73	2.91	1.36E-03	1.46E-04
263495_at	At2g42530	cold-responsive protein / cold-regulated protein (cor15b)	-3.32	-5.35	1.36E-03	9.84E-06
266105_at	At2g45070	sec61beta family protein	2.31	2.39	1.36E-03	5.64E-05
266460_at	At2g47930	hydroxyproline-rich glycoprotein family protein	-4.46	-8.55	1.36E-03	8.13E-05
245156_at	At5g12480	calmodulin-domain protein kinase isoform 7 (CPK7)	1.79	2.17	1.37E-03	1.13E-03
246004_at	At5g20630	germin-like protein (GER3)	-62.11	-85.47	1.37E-03	9.87E-05
260735_at	At1g17610	disease resistance protein-related	2.45	3.99	1.37E-03	7.10E-05
260804_at	At1g78410	VQ motif-containing protein	21.20	59.39	1.37E-03	3.46E-04
263846_at	At2g36990	RNA polymerase sigma subunit SigF (sigF) / sigma-like factor (SIG6)	-2.31	-1.63	1.38E-03	9.98E-05
247800_at	At5g58570 At5g58560	phosphatidate cytidylyltransferase family protein	1.49	3.10	1.39E-03	1.13E-04
248291_at	At5g53020	expressed protein	-3.39	-3.03	1.39E-03	5.06E-04
252939_at	At4g39230	isoflavone reductase, putative	2.78	2.66	1.39E-03	8.82E-06
255488_at	At4g02630	protein kinase family protein	-3.88	-4.46	1.39E-03	1.75E-05
259629_at	At1g56510	disease resistance protein (TIR-NBS-LRR class), putative	1.64	2.81	1.39E-03	3.01E-02
259664_at	At1g55330	arabinogalactan-protein (AGP21)	-15.43	-18.80	1.39E-03	1.53E-05
265742_at	At2g01290	expressed protein	-2.44	-1.73	1.39E-03	2.76E-03
266071_at	At2g18680	expressed protein	6.02	7.39	1.39E-03	4.62E-03
254741_s_at	At4g13920 At4g13900	disease resistance family protein / LRR family protein	5.63	11.62	1.40E-03	1.68E-04
264958_at	At1g76960	expressed protein	4.58	5.48	1.40E-03	1.78E-03
245197_at	At1g67800	copine-related	1.98	2.53	1.41E-03	4.74E-03
250738_at	At5g05730	anthranilate synthase, alpha subunit, component I-1 (ASA1)	2.85	2.49	1.41E-03	1.84E-04
252533_at	At3g46110	expressed protein	3.47	2.72	1.41E-03	4.75E-04
258277_at	At3g26830	cytochrome P450 71B15, putative (CYP71B15)	19.83	20.96	1.41E-03	4.98E-05
264522_at	At1g10050	glycosyl hydrolase family 10 protein / carbohydrate-binding domain-containing protein	1.84	2.01	1.41E-03	6.84E-03
252033_at	At3g51950	zinc finger (CCCH-type) family protein / RNA recognition motif (RRM)-containing protein,	-2.72	-3.32	1.42E-03	4.75E-04
256516_at	At1g66150	leucine-rich repeat protein kinase, putative (TMK1)	-2.53	-3.04	1.42E-03	3.49E-05
256756_at	At3g25610	haloacid dehalogenase-like hydrolase family protein	2.83	3.13	1.42E-03	2.11E-04
262119_s_at	At1g02930 At1g02920	glutathione S-transferase, putative	7.74	8.38	1.42E-03	7.50E-04
265998_at	At2g24270	NADP-dependent glyceraldehyde-3-phosphate dehydrogenase, putative	-2.07	-1.25	1.43E-03	2.33E-05
246653_at	At5g35200	epsin N-terminal homology (ENTH) domain-containing protein	2.28	2.10	1.44E-03	1.23E-04
253647_at	At4g29950	microtubule-associated protein	2.18	2.63	1.44E-03	1.42E-02
248046_at	At5g56040	leucine-rich repeat protein kinase, putative	-2.42	-2.29	1.45E-03	1.03E-04
249234_at	At5g42200	zinc finger (C3HC4-type RING finger) family protein	-1.82	-2.82	1.45E-03	6.41E-06
253903_at	At4g27180	kinesin-like protein B (KATB)	-2.20	-2.34	1.45E-03	2.16E-04
254166_at	At4g24190	shepherd protein (SHD) / clavata formation protein, putative,	3.11	4.17	1.45E-03	5.07E-05
256989_at	At3g28580	AAA-type ATPase family protein	1.49	6.82	1.45E-03	5.93E-06
257466_at	At1g62840	expressed protein	2.91	4.13	1.45E-03	7.88E-03
261378_at	At1g18890	calcium-dependent protein kinase 1 (CDPK1)	2.14	3.65	1.45E-03	4.68E-02
245749_at	At1g51090	heavy-metal-associated domain-containing protein	-3.30	-4.18	1.46E-03	3.02E-04
248920_at	At5g45930	magnesium-chelatase subunit chlI, chloroplast, putative / Mg-protoporphyrin IX chelatase, putative	-2.82	-2.97	1.46E-03	3.02E-04
251031_at	At5g02120	thylakoid membrane one helix protein (OHP)	-2.78	-2.41	1.46E-03	4.37E-05
258434_at	At3g16770	ERF/AP2 transcription factor family (RAP2.3)	-2.31	-6.45	1.46E-03	1.46E-03
265132_at	At1g23830	expressed protein	2.46	2.79	1.46E-03	2.61E-04
265460_at	At2g46600	calcium-binding protein, putative	3.05	4.98	1.46E-03	2.46E-03
246487_at	At5g16030	expressed protein	-3.51	-8.13	1.47E-03	4.06E-05
251400_at	At3g60420	expressed protein	7.15	9.16	1.47E-03	1.24E-04
255148_at	At4g08470	mitogen-activated protein kinase, putative	2.06	2.20	1.47E-03	2.75E-03
255259_at	At4g05020	NADH dehydrogenase-related	3.44	5.67	1.47E-03	1.73E-04
256021_at	At1g58270	meprin and TRAF homology domain-containing protein / MATH domain-containing protein	-8.47	-15.20	1.47E-03	4.46E-06
267247_at	At2g30170	expressed protein	-2.41	-2.39	1.47E-03	5.39E-05
246630_at	At1g50730	expressed protein	-2.02	-2.51	1.48E-03	1.69E-04
248787_at	At5g47420	expressed protein	2.05	2.16	1.48E-03	1.27E-05
253777_at	At4g28450	transducin family protein / WD-40 repeat family protein, SOF1 (involved in rRNA processing) protein-yeast	2.28	2.33	1.49E-03	8.12E-05
265061_at	At1g61640	ABC1 family protein	1.98	2.37	1.49E-03	9.80E-04
265918_at	At2g15090	fatty acid elongase, putative	-3.68	-4.69	1.49E-03	4.04E-06
257540_at	At3g21520	expressed protein	2.16	5.14	1.50E-03	7.59E-06
258786_at	At3g11820	syntaxin 121 (SYP121) / syntaxin-related protein (SYR1)	3.84	4.17	1.50E-03	1.80E-04
266022_at	At2g05920	subtilase family protein	-2.22	-1.65	1.50E-03	5.95E-04
245611_at	At4g14390	ankyrin repeat family protein	3.19	3.64	1.51E-03	7.30E-05
246755_at	At5g27920	F-box family protein, contains similarity to leucine-rich repeats containing F-box protein	1.96	2.39	1.51E-03	1.12E-03
252272_at	At3g49670	leucine-rich repeat transmembrane protein kinase, putative, CLAVATA1 receptor kinase	-3.66	-5.29	1.51E-03	6.97E-03
263715_at	At2g20570	golden2-like transcription factor (GLK1)	-1.53	-2.16	1.51E-03	3.40E-03
265698_at	At2g32160	expressed protein	2.16	2.06	1.51E-03	3.55E-04
259430_at	At1g01610	glycerol-3-phosphate acyltransferase activity.	-2.79	-3.88	1.52E-03	1.22E-05
262536_at	At1g17100	SOUL heme-binding family protein	-3.19	-2.03	1.52E-03	1.81E-05
264362_at	At1g03290	expressed protein	2.99	2.96	1.52E-03	1.54E-04
267486_at	At2g02800	protein kinase (APK2b)	2.03	2.00	1.52E-03	3.98E-04
247493_at	At5g61900	copine BONZAI1 (BON1)	2.34	3.28	1.53E-03	2.75E-04
248817_at	At5g47020	glycine-rich protein	-1.86	-2.01	1.53E-03	1.37E-02
254328_at	At4g22570	adenine phosphoribosyltransferase, putative	-3.06	-1.76	1.53E-03	6.63E-05
263597_at	At2g01860 At2g01870	pentatricopeptide (PPR) repeat-containing protein	-2.88	-2.57	1.55E-03	7.47E-05
254275_at	At4g22670	tetratricopeptide repeat (TPR)-containing protein	2.34	2.15	1.56E-03	7.20E-05
259219_at	At3g03560	expressed protein	1.87	2.45	1.56E-03	2.34E-04
245038_at	At2g26560	patatin, putative, similar to patatin-like latex allergen (Hevea brasiliensis)(PMID:10589016)	6.82	7.26	1.57E-03	5.93E-04
246133_at	At5g20960	aldehyde oxidase 1 (AAO1)	3.30	2.88	1.57E-03	4.52E-05
246293_at	At3g56710	sigA-binding protein	5.05	4.56	1.57E-03	3.16E-04
251017_at	At5g02760	protein phosphatase 2C family protein / PP2C family protein	-6.29	-18.05	1.57E-03	1.92E-05
251232_at	At3g62780	C2 domain-containing protein	3.91	3.46	1.57E-03	5.39E-05
252184_at	At3g50660	steroid 22-alpha-hydroxylase (CYP90B1) (DWF4)	-2.60	-2.54	1.57E-03	4.90E-04
252373_at	At3g48090	disease resistance protein (EDS1)	3.58	6.86	1.57E-03	4.37E-05
252374_at	At3g48100	two-component responsive regulator / response regulator 5 (ARR5)	1.36	3.77	1.57E-03	1.34E-02
253173_at	At4g35110	expressed protein	1.94	4.33	1.57E-03	1.73E-05
253650_at	At4g30020	subtilase family protein	-4.03	-5.38	1.57E-03	1.49E-04
256526_at	At1g66090	disease resistance protein (TIR-NBS class), putative	3.36	4.44	1.57E-03	1.47E-03
259410_at	At1g13340	expressed protein	1.52	3.96	1.57E-03	2.60E-05
260656_at	At1g19380	expressed protein	2.26	2.49	1.57E-03	1.12E-03
263379_at	At2g40140	zinc finger (CCCH-type) family protein	4.29	4.28	1.57E-03	3.15E-04
251068_at	At5g01920	protein kinase family protein	-2.46	-2.42	1.58E-03	8.88E-05
254690_at	At4g17830	peptidase M20/M25/M40 family protein	1.79	2.02	1.58E-03	7.22E-05
256183_at	At1g51660	mitogen-activated protein kinase kinase (MAPKK), putative (MKK4)	2.88	4.70	1.58E-03	1.09E-04
257772_at	At3g23080	expressed protein	-3.80	-4.48	1.58E-03	4.74E-05
258736_at	At3g05900	neurofilament protein-related	-1.97	-2.38	1.58E-03	2.32E-04
248551_at	At5g50200	expressed protein	6.65	7.58	1.59E-03	6.69E-04
248698_at	At5g48380	leucine-rich repeat family protein / protein kinase family proteinrepeats	2.95	3.37	1.59E-03	1.80E-04
257382_at	At2g40750	WRKY family transcription factor	3.30	2.77	1.59E-03	1.97E-04
261526_at	At1g14370	protein kinase (APK2a)	2.62	3.59	1.59E-03	2.15E-04
250812_at	At5g04900	short-chain dehydrogenase/reductase (SDR) family protein	-1.85	-2.34	1.60E-03	9.95E-04
245790_at	At1g32200	glycerol-3-phosphate acyltransferase, chloroplast (ATS1)	-2.14	-1.98	1.61E-03	2.78E-04
256911_at	At3g24090	glucosamine--fructose-6-phosphate aminotransferase (isomerizing), putative / hexosephosphate aminotransferase, putative / glucosamine-6-phosphate synthase, putative / D-fructose-6-phosphate amidotransferase, putative / GLCN6P synthase, putative	2.72	4.09	1.61E-03	3.68E-05
258072_at	At3g26090	expressed protein	2.29	2.49	1.61E-03	7.75E-03
246290_at	At3g56800	calmodulin-2/3/5 (CAM3)	1.98	2.29	1.62E-03	1.07E-04
247768_at	At5g58900	myb family transcription factor	-2.58	-2.64	1.62E-03	2.88E-05
249230_at	At5g42070	expressed protein	-3.40	-4.03	1.62E-03	1.13E-04
252592_at	At3g45640	mitogen-activated protein kinase, putative / MAPK, putative (MPK3)	2.15	2.37	1.62E-03	2.12E-03
257236_at	At3g15095	expressed protein	-2.23	-2.59	1.62E-03	8.43E-05
259937_s_at	At3g13080 At1g71330	ABC transporter family protein	2.25	5.54	1.62E-03	2.40E-04
260884_at	At1g29240	expressed protein	2.60	2.85	1.62E-03	8.55E-05
252563_at	At3g45980 At3g45970	histone H2B	-2.67	-2.46	1.63E-03	4.00E-06
256601_s_at	At3g28290At3g28300	Possesses a transmembrane domain and a small region that has sequence similarities to integrins from fungi, insects and humans	-11.75	-15.90	1.63E-03	5.07E-05
263800_at	At2g24600	ankyrin repeat family protein	4.51	6.20	1.63E-03	3.54E-04
264178_at	At1g02170	Metacaspase AtMCP1b. Arginine/lysine-specific cysteine protease activity	2.25	2.12	1.63E-03	2.83E-05
264488_s_at	At1g27330 At1g27350	expressed protein	2.63	2.88	1.63E-03	1.56E-03
252098_at	At3g51330	aspartyl protease family protein	7.29	7.47	1.64E-03	3.10E-04
261931_at	At1g22430	alcohol dehydrogenase, putative	-3.55	-2.45	1.64E-03	4.22E-05
261973_at	At1g64610	WD-40 repeat family protein	3.56	5.52	1.64E-03	2.15E-04
262919_at	At1g79380	copine-related	2.51	2.32	1.64E-03	3.49E-05
246943_at	At5g25440	protein kinase family protein	3.39	3.37	1.65E-03	1.53E-04
264774_at	At1g22890	expressed protein	3.63	3.00	1.65E-03	7.56E-04
246600_at	At5g14930	leaf senescence-associated protein (SAG101)	2.27	3.98	1.66E-03	5.61E-03
259910_at	At1g72700	haloacid dehalogenase-like hydrolase family protein	1.72	3.35	1.66E-03	1.01E-04
248298_at	At5g53110	expressed protein	2.02	4.40	1.67E-03	1.09E-04
262181_at	At1g78050 At1g78060	phosphoglycerate/bisphosphoglycerate mutase family protein	-2.77	-2.72	1.67E-03	4.02E-04
246976_s_at	At5g24810	ABC1 family protein	2.39	3.00	1.68E-03	1.13E-03
253997_at	At4g26090 At4g26100	disease resistance protein RPS2 (CC-NBS-LRR class), putative	2.44	2.24	1.68E-03	2.74E-03
264883_s_at	At1g61250 At1g11180	secretory carrier membrane protein (SCAMP) family protein (SC3)	2.13	2.39	1.68E-03	1.23E-03
251634_at	At3g57480	zinc finger (C2H2 type, AN1-like) family protein	2.47	2.37	1.69E-03	7.70E-03
260239_at	At1g74360	leucine-rich repeat transmembrane protein kinase, putative	4.25	9.07	1.69E-03	7.75E-05
264663_at	At1g09970	leucine-rich repeat transmembrane protein kinase, putative	3.83	3.97	1.69E-03	3.35E-03
256964_at	At3g13520	arabinogalactan-protein (AGP12)	-5.71	-7.75	1.70E-03	5.07E-05
266172_at	At2g39010	aquaporin, putative	-2.97	-4.08	1.70E-03	2.96E-05
256881_at	At3g26410	expressed protein	2.12	1.97	1.71E-03	7.71E-05
258164_at	At3g17910	surfeit 1 (SURF1)	2.07	2.02	1.71E-03	4.38E-03
263452_at	At2g22190	trehalose-6-phosphate phosphatase, putative	-1.96	-2.44	1.71E-03	3.04E-01
246908_at	At5g25610	dehydration-responsive protein (RD22)	-2.17	-4.72	1.72E-03	1.52E-05
248258_at	At5g53400	nuclear movement family protein	2.45	2.01	1.72E-03	1.73E-04
255599_at	At4g01010	cyclic nucleotide-regulated ion channel, putative (CNGC13)	2.31	3.45	1.72E-03	8.92E-05
260179_at	At1g70690	kinase-related	2.83	2.94	1.72E-03	2.37E-04
260636_at	At1g62430	phosphatidate cytidylyltransferase / CDP-diglyceride synthetase (CDS1)	-2.03	-1.76	1.72E-03	5.39E-05
250941_at	At5g03320	protein kinase, putative	2.01	2.04	1.73E-03	3.45E-03
252076_at	At3g51660	macrophage migration inhibitory factor family protein / MIF family protein	2.02	3.18	1.73E-03	1.76E-03
260465_at	At1g10910	pentatricopeptide (PPR) repeat-containing protein	-1.99	-2.16	1.73E-03	1.20E-03
247533_at	At5g61570	protein kinase family protein	-2.37	-2.18	1.74E-03	8.82E-05
248330_at	At5g52810	ornithine cyclodeaminase/mu-crystallin family protein	5.63	6.42	1.74E-03	5.35E-04
254133_at	At4g24810	ABC1 family protein	-2.12	-1.81	1.74E-03	3.34E-05
258054_at	At3g16240	delta tonoplast integral protein (delta-TIP)	-12.36	-13.74	1.74E-03	3.44E-04
263606_at	At2g16280	very-long-chain fatty acid condensing enzyme, putative	-2.54	-2.49	1.74E-03	1.80E-05
263761_at	At2g21330	fructose-bisphosphate aldolase, putative	-3.05	-1.57	1.74E-03	1.20E-05
266608_at	At2g35500	shikimate kinase-related	-2.23	-2.42	1.74E-03	1.35E-03
267567_at	At2g30770	cytochrome P450 71A13, putative (CYP71A13)	4.55	19.29	1.74E-03	1.50E-05
247853_at	At5g58140	protein kinase family protein / non phototropic hypocotyl 1-like protein (NPL1)	-2.18	-2.95	1.75E-03	4.23E-04
251769_at	At3g55950	protein kinase family protein	4.13	8.76	1.75E-03	5.50E-05
254040_at	At4g25900	aldose 1-epimerase family protein	2.21	2.11	1.75E-03	1.60E-04
246927_s_at	At5g25260 At5g25250	expressed protein	8.63	13.80	1.76E-03	2.11E-04
252572_at	At3g45290	seven transmembrane MLO family protein / MLO-like protein 3 (MLO3)	2.85	3.96	1.76E-03	1.97E-04
253646_at	At4g29810	mitogen-activated protein kinase kinase (MAPKK) (MKK2)	3.16	2.81	1.76E-03	4.85E-05
260106_at	At1g35420	dienelactone hydrolase family protein	-1.82	-2.36	1.76E-03	1.26E-03
265377_at	At2g05790	glycosyl hydrolase family 17 protein	-6.58	-7.35	1.76E-03	5.29E-05
247494_at	At5g61790	calnexin 1 (CNX1)	4.56	5.22	1.77E-03	3.66E-05
247977_at	At5g56850	expressed protein	-2.36	-1.85	1.77E-03	3.90E-03
252861_at	At4g39820	expressed protein	1.66	2.14	1.77E-03	5.73E-05
259250_at	At3g07580	expressed protein	2.57	3.13	1.77E-03	2.46E-03
249480_s_at	At5g38990 At5g39000	protein kinase family protein	2.03	2.05	1.79E-03	2.71E-04
267214_at	At2g43970	La domain-containing protein	2.30	2.10	1.79E-03	6.84E-04
248467_at	At5g50800	nodulin MtN3 family protein	-3.65	-4.35	1.80E-03	6.45E-04
249472_at	At5g39210	expressed protein	-4.85	-3.44	1.80E-03	4.15E-05
252298_at	At3g49060	protein kinase family protein / U-box domain-containing protein	2.01	2.04	1.80E-03	4.47E-04
252853_at	At4g39710	immunophilin, putative / FKBP-type peptidyl-prolyl cis-trans isomerase, putative	-3.70	-3.24	1.80E-03	7.08E-05
256069_at	At1g13740	expressed protein	-3.07	-3.31	1.80E-03	6.25E-04
257734_at	At3g18370	C2 domain-containing protein	2.25	2.24	1.80E-03	5.16E-04
245951_at	At5g19550	aspartate aminotransferase, cytoplasmic isozyme 1 / transaminase A (ASP2)	1.67	2.22	1.81E-03	8.93E-04
246055_at	At5g08380	alpha-galactosidase, putative / melibiase, putative / alpha-D-galactoside galactohydrolase, putative	2.43	2.62	1.81E-03	2.73E-04
253790_at	At4g28660	photosystem II reaction centre W (PsbW) family protein	-2.74	-2.26	1.81E-03	3.35E-04
259479_at	At1g19020	expressed protein	8.68	11.07	1.81E-03	9.80E-04
261161_at	At1g34420	leucine-rich repeat family protein / protein kinase family protein	3.43	4.34	1.81E-03	7.80E-05
264014_at	At2g21210	auxin-responsive protein, putative	-4.78	-11.47	1.81E-03	6.05E-04
265100_at	At1g31010	expressed protein	2.18	2.43	1.81E-03	2.22E-04
265480_at	At2g15970	cold-acclimation protein, putative (FL3-5A3)	-1.86	-2.27	1.81E-03	1.21E-05
265724_at	At2g32100	ovate protein-related	-1.77	-3.25	1.81E-03	1.62E-04
266127_s_at	At1g45332 At2g45030	mitochondrial elongation factor, putative	2.19	2.31	1.81E-03	2.95E-04
247452_at	At5g62430	Dof-type zinc finger domain-containing protein	-1.71	-2.27	1.82E-03	4.47E-03
248273_at	At5g53500	WD-40 repeat family protein	-1.77	-2.20	1.82E-03	4.65E-04
253039_at	At4g37760	squalene monooxygenase, putative / squalene epoxidase, putative	-2.05	-1.79	1.82E-03	4.33E-05
254014_at	At4g26120	ankyrin repeat family protein / BTB/POZ domain-containing protein	1.98	3.37	1.82E-03	1.03E-04
254232_at	At4g23600	coronatine-responsive tyrosine aminotransferase / tyrosine transaminase	-1.37	-10.67	1.82E-03	1.67E-05
257938_at	At3g19820	cell elongation protein / DWARF1 / DIMINUTO (DIM)	-2.17	-4.42	1.82E-03	8.51E-03
258362_at	At3g14280	expressed protein	3.58	4.04	1.82E-03	2.34E-04
258484_at	At3g02580	delta 7-sterol-C5-desaturase (STE1)	-2.04	-2.18	1.82E-03	8.74E-05
259749_at	At1g71100	ribose 5-phosphate isomerase-related	2.34	3.12	1.82E-03	1.25E-03
260014_at	At1g68010	glycerate dehydrogenase / NADH-dependent hydroxypyruvate reductase	-2.11	-2.02	1.82E-03	1.51E-05
251133_at	At5g01240	amino acid permease, putative	-2.16	-2.44	1.83E-03	6.03E-05
253273_at	At4g34180	cyclase family protein	1.75	2.10	1.83E-03	1.61E-03
262942_at	At1g79450	LEM3 (ligand-effect modulator 3) family protein / CDC50 family protein	2.13	2.58	1.83E-03	4.37E-05
260086_at	At1g63240	expressed protein	-1.92	-2.66	1.84E-03	1.20E-04
264240_at	At1g54820	protein kinase family protein	-5.41	-8.06	1.84E-03	5.39E-05
245629_at	At1g56580	expressed protein	-2.27	-3.06	1.85E-03	1.13E-04
256237_at	At3g12610	DNA-damage-repair/toleration protein, putative (DRT100)	-13.00	-14.47	1.85E-03	5.50E-05
265269_at	At2g42950	expressed protein	1.81	2.12	1.85E-03	7.49E-05
247602_at	At5g60900	lectin protein kinase family protein	3.46	3.91	1.86E-03	4.89E-04
248276_at	At5g53550	transporter, putative	4.01	4.83	1.86E-03	8.96E-04
254948_at	At4g11000	ankyrin repeat family protein	3.10	3.78	1.86E-03	1.04E-03
258792_at	At3g04640	glycine-rich protein	5.94	8.05	1.86E-03	3.26E-03
259660_at	At1g55260	protease inhibitor/seed storage/lipid transfer protein (LTP) family protein	-6.99	-14.68	1.86E-03	3.84E-05
264624_at	At1g08930	early-responsive to dehydration stress protein (ERD6) / sugar transporter family protein	2.77	3.46	1.86E-03	1.64E-03
265985_at	At2g24220	purine permease-related	-2.39	-2.44	1.86E-03	2.77E-04
266421_at	At2g38540	nonspecific lipid transfer protein 1 (LTP1)	-4.69	-12.71	1.86E-03	2.23E-05
249900_at	At5g22640	MORN (Membrane Occupation and Recognition Nexus) repeat-containing protein	-2.32	-2.14	1.87E-03	8.88E-05
262943_at	At1g79470	inosine-5'-monophosphate dehydrogenase	1.98	2.12	1.87E-03	4.03E-07
245285_s_at	At4g14030 At4g14040	selenium-binding protein, putative	-2.30	-1.72	1.88E-03	1.50E-05
256958_at	At3g13430	zinc finger (C3HC4-type RING finger) family protein	2.03	2.09	1.88E-03	3.74E-03
263829_at	At2g40435	expressed protein	-3.51	-3.89	1.88E-03	3.54E-02
267165_at	At2g37710	lectin protein kinase, putative	2.54	2.76	1.88E-03	3.12E-04
266780_at	At2g29110	glutamate receptor family protein (GLR2.8) (GLUR9)	1.45	4.02	1.89E-03	2.37E-05
248309_at	At5g52540	expressed protein\	3.40	3.40	1.90E-03	1.13E-04
251054_at	At5g01540	lectin protein kinase, putative	1.95	4.52	1.90E-03	6.07E-04
253534_at	At4g31500	cytochrome P450 83B1 (CYP83B1)	2.21	2.41	1.90E-03	2.95E-03
255008_at	At4g10060	expressed protein	-2.16	-1.79	1.90E-03	2.05E-04
255116_at	At4g08850	leucine-rich repeat family protein / protein kinase family protein	2.67	3.86	1.90E-03	5.03E-03
255381_at	At4g03510	zinc finger (C3HC4-type RING finger) family protein (RMA1)	-1.56	-2.56	1.90E-03	8.82E-06
257249_at	At3g24180	expressed protein	2.36	2.02	1.90E-03	2.22E-04
259364_at	At1g13260	DNA-binding protein RAV1 (RAV1)	2.76	2.53	1.90E-03	1.03E-02
262411_at	At1g34640	expressed protein	-2.17	-1.97	1.90E-03	3.06E-03
264908_at	At2g17440	leucine-rich repeat family protein	1.53	2.47	1.90E-03	5.20E-03
261518_at	At1g71695	peroxidase 12 (PER12) (P12) (PRXR6)	-1.66	-3.13	1.91E-03	3.08E-05
256922_at	At3g19010	oxidoreductase, 2OG-Fe(II) oxygenase family protein	2.95	3.45	1.92E-03	8.31E-04
259211_at	At3g09020	alpha 1,4-glycosyltransferase family protein / glycosyltransferase sugar-binding DXD motif-containing protein	4.10	3.96	1.92E-03	4.88E-04
261711_at	At1g32700	zinc-binding family protein	2.61	2.08	1.92E-03	6.39E-03
252591_at	At3g45600	senescence-associated family protein	-2.31	-1.87	1.93E-03	1.44E-04
260385_at	At1g74090	sulfotransferase family protein	-2.80	-2.69	1.93E-03	1.27E-04
264238_at	At1g54740	expressed protein	-2.33	-2.43	1.94E-03	4.75E-05
264655_at	At1g09070	C2 domain-containing protein / src2-like protein, putative	2.60	2.92	1.94E-03	1.02E-03
249485_at	At5g39020	protein kinase family protein	2.47	3.37	1.95E-03	4.47E-03
251741_at	At3g56040	expressed protein	-2.45	-2.28	1.95E-03	4.16E-04
257985_at	At3g20810	transcription factor jumonji (jmjC) domain-containing protein	-1.80	-2.14	1.95E-03	2.09E-04
259019_at	At3g07370	tetratricopeptide repeat (TPR)-containing protein / U-box domain-containing protein	1.79	2.22	1.95E-03	1.75E-03
260081_at	At1g78170	expressed protein	-3.00	-5.18	1.95E-03	3.15E-02
261861_at	At1g50450	expressed protein	-2.42	-2.25	1.95E-03	7.59E-04
266471_at	At2g31060	elongation factor family protein	2.75	2.79	1.95E-03	1.13E-03
258588_s_at	At3g04120	glyceraldehyde-3-phosphate dehydrogenase, cytosolic (GAPC) / NAD-dependent glyceraldehyde-3-phosphate dehydrogenase	1.42	2.05	1.96E-03	3.79E-04
AFFX-r2-At-GAPDH-3_s_at	At3g04120	glyceraldehyde-3-phosphate dehydrogenase, cytosolic (GAPC) / NAD-dependent glyceraldehyde-3-phosphate dehydrogenase	1.51	2.20	1.96E-03	1.66E-04
245879_at	At5g09420	chloroplast outer membrane translocon subunit, putative	2.84	2.82	1.97E-03	2.17E-04
251901_at	At3g54100	expressed protein	2.03	2.09	1.97E-03	2.36E-04
254117_at	At4g24750	rhodanese-like domain-containing protein	-1.93	-2.58	1.97E-03	1.61E-03
259460_at	At1g44000	expressed protein	-3.38	-2.43	1.97E-03	6.91E-05
246154_at	At5g19940	plastid-lipid associated protein PAP-related / fibrillin-related	-1.60	-2.41	1.98E-03	1.55E-04
246777_at	At5g27420	zinc finger (C3HC4-type RING finger) family protein	11.92	14.07	1.98E-03	1.86E-03
247936_at	At5g57030	lycopene epsilon cyclase	-2.12	-2.05	1.98E-03	6.55E-04
251353_at	At3g61080	fructosamine kinase family protein, contains Pfam PF03881: Fructosamine kinase	-2.13	-3.12	1.98E-03	5.80E-05
257700_at	At3g12740	LEM3 (ligand-effect modulator 3) family protein / CDC50 family protein	2.58	2.49	1.98E-03	3.09E-04
259228_at	At3g07720	kelch repeat-containing protein	2.20	2.46	1.98E-03	2.15E-03
259375_at	At3g16370	GDSL-motif lipase/hydrolase family protein	-5.52	-10.19	1.98E-03	3.25E-05
264696_at	At1g70230	expressed protein	-2.49	-2.44	1.98E-03	2.17E-04
246422_at	At5g17060	ADP-ribosylation factor and similar to ADP-ribosylation factor 1	1.89	2.35	1.99E-03	1.27E-04
247884_at	At5g57800	CER1 protein, putative (WAX2)	-2.28	-2.69	1.99E-03	2.95E-05
251140_at	At5g01090	legume lectin family protein	-1.90	-2.05	1.99E-03	2.38E-04
253440_at	At4g32570	expressed protein	-2.44	-2.74	1.99E-03	3.14E-04
253627_at	At4g30650	hydrophobic protein, putative / low temperature and salt responsive protein, putative	-2.17	-2.17	1.99E-03	9.00E-05
247288_at	At5g64330	non-phototropic hypocotyl 3 (NPH3)	-2.45	-2.93	2.00E-03	5.70E-04
249489_at	At5g39090	transferase family protein	1.84	2.12	2.00E-03	5.71E-04
252155_at	At3g50920	phosphatidic acid phosphatase-related / PAP2-related	1.82	2.40	2.00E-03	2.06E-05
253331_at	At4g33490	nucellin protein, putative	-3.38	-4.59	2.00E-03	8.36E-05
256304_at	At1g69523	UbiE/COQ5 methyltransferase family protein	-2.99	-4.05	2.00E-03	1.81E-04
261638_at	At1g49975	expressed protein	-2.84	-2.38	2.00E-03	8.69E-04
263709_at	At1g09310	expressed protein	-4.07	-8.20	2.00E-03	2.68E-05
246305_at	At3g51890	expressed protein	2.97	2.78	2.01E-03	3.83E-04
247191_at	At5g65310	homeobox-leucine zipper protein 5 (HB-5) / HD-ZIP transcription factor 5	-3.13	-4.61	2.01E-03	1.96E-02
251071_at	At5g01950	leucine-rich repeat transmembrane protein kinase, putative	2.25	2.53	2.01E-03	9.90E-05
254723_at	At4g13510	ammonium transporter 1, member 1 (AMT1.1)	3.46	3.96	2.01E-03	4.05E-04
255595_at	At4g01700	chitinase, putative	9.89	10.01	2.01E-03	7.86E-05
261318_at	At1g53035	expressed protein	-2.26	-2.26	2.01E-03	3.19E-05
262092_at	At1g56150	auxin-responsive family protein	2.11	2.42	2.01E-03	7.65E-03
263737_at	At1g60010	expressed protein	-2.24	-2.15	2.01E-03	7.45E-04
264260_at	At1g09210	calreticulin 2 (CRT2)	3.28	4.16	2.01E-03	3.49E-05
266371_at	At2g41410	calmodulin, putative	4.40	7.32	2.01E-03	3.03E-03
246997_at	At5g67390	expressed protein	-2.31	-2.55	2.02E-03	3.17E-04
257764_at	At3g23010	disease resistance family protein / LRR family protein	2.71	2.60	2.02E-03	5.18E-03
266267_at	At2g29460	glutathione S-transferase, putative	18.37	16.30	2.02E-03	2.93E-03
251910_at	At3g53810	lectin protein kinase, putative	2.87	3.79	2.03E-03	4.06E-05
252681_at	At3g44350	no apical meristem (NAM) family protein, Tobacco elicitor-responsive gene (TERN), NAC-domain protein	1.12	3.17	2.03E-03	1.87E-05
255941_at	At1g20350	mitochondrial import inner membrane translocase subunit Tim17, putative	1.90	3.93	2.03E-03	7.60E-03
258650_at	At3g09830	protein kinase, putative	2.96	3.50	2.03E-03	2.32E-03
248045_at	At5g56030	heat shock protein 81-2 (HSP81-2)	2.69	1.81	2.04E-03	1.13E-04
250016_at	At5g18100	superoxide dismutase (Cu-Zn) / copper/zinc superoxide dismutase (CSD3)	-1.79	-2.31	2.04E-03	1.13E-04
261577_at	At1g01080	33 kDa ribonucleoprotein, chloroplast, putative / RNA-binding protein cp33, putative	-2.52	-2.41	2.04E-03	3.14E-04
266483_at	At2g47910	expressed protein	-2.29	-2.33	2.04E-03	5.02E-04
251037_at	At5g02100	oxysterol-binding family protein	2.42	2.33	2.05E-03	6.50E-05
256042_at	At1g07220	expressed protein	2.21	2.30	2.05E-03	5.73E-05
247074_at	At5g66590	allergen V5/Tpx-1-related family protein	-2.56	-3.95	2.06E-03	6.94E-05
248839_at	At5g46690	basic helix-loop-helix (bHLH) family protein	-5.10	-6.94	2.06E-03	3.55E-04
248921_at	At5g45950	GDSL-motif lipase/hydrolase family protein	-6.33	-8.62	2.06E-03	3.07E-04
259071_at	At3g11650	harpin-induced family protein / HIN1 family protein / harpin-responsive family protein / NDR1/HIN1-like protein 2	1.93	3.47	2.06E-03	1.87E-03
259925_at	At1g75040	pathogenesis-related protein 5 (PR-5)	6.68	16.55	2.06E-03	7.15E-03
264653_at	At1g08980	amidase family protein	-1.81	-3.03	2.06E-03	6.43E-05
249889_at	At5g22540	expressed protein	1.83	2.65	2.07E-03	4.74E-05
254894_at	At4g11840	phospholipase D gamma 3 / PLD gamma 3 (PLDGAMMA3)	2.72	3.73	2.07E-03	1.36E-04
258432_at	At3g16570	rapid alkalinization factor (RALF) family protein	-2.24	-2.51	2.07E-03	4.22E-05
259992_at	At1g67970	heat shock factor protein, putative (HSF5) / heat shock transcription factor, putative (HSTF5)	1.84	3.39	2.07E-03	1.04E-03
262304_at	At1g70890	major latex protein-related / MLP-related	-2.48	-3.34	2.07E-03	2.93E-04
254592_at	At4g18880	heat shock transcription factor 21 (HSF21)	3.01	3.57	2.08E-03	1.94E-04
257955_at	At3g21810	zinc finger (CCCH-type) family protein	2.11	2.19	2.08E-03	3.22E-04
257008_at	At3g14210	myrosinase-associated protein, putative	-2.25	-5.59	2.09E-03	1.15E-04
265446_at	At2g37110	expressed protein	1.64	2.09	2.10E-03	9.49E-04
254521_at	At5g44820	expressed protein	2.04	3.23	2.12E-03	2.74E-03
262225_at	At1g53840	pectinesterase family protein	-1.95	-2.29	2.12E-03	1.39E-04
253966_at	At4g26520	fructose-bisphosphate aldolase, cytoplasmic	-3.56	-3.36	2.13E-03	7.81E-05
256880_at	At3g26450	major latex protein-related / MLP-related	-1.97	-2.27	2.13E-03	4.75E-04
245383_at	At4g17810	zinc finger (C2H2 type) family protein	-1.53	-2.19	2.14E-03	4.11E-04
253779_at	At4g28490	leucine-rich repeat transmembrane protein kinase, putative	3.95	4.02	2.14E-03	2.19E-03
258535_at	At3g06750	hydroxyproline-rich glycoprotein family protein	-3.09	-3.60	2.14E-03	6.50E-05
260875_at	At1g21410	F-box family protein	-2.01	-2.24	2.15E-03	1.44E-04
245138_at	At2g45190	axial regulator YABBY1 (YABBY1) / abnormal floral organs protein (AFO) / filamentous flower protein (FIL)	-2.47	-2.79	2.16E-03	4.15E-05
258532_at	At3g06700	60S ribosomal protein L29 (RPL29A)	1.50	2.37	2.16E-03	8.88E-03
263442_at	At2g28605	expressed protein	-2.82	-2.59	2.16E-03	5.89E-05
246302_at	At3g51860	cation exchanger, putative (CAX3)	1.99	5.11	2.17E-03	3.84E-05
265673_at	At2g32090	lactoylglutathione lyase family protein / glyoxalase I family protein	-1.68	-2.02	2.17E-03	3.94E-03
251419_at	At3g60470	expressed protein	1.93	3.92	2.18E-03	2.59E-05
254746_at	At4g12980	auxin-responsive protein, putative	-4.29	-4.00	2.18E-03	9.00E-05
258984_at	At3g08970	DNAJ heat shock N-terminal domain-containing protein	3.17	4.11	2.18E-03	4.23E-05
263076_at	At2g17520	protein kinase family protein / Ire1 homolog-2 (IRE1-2)	2.02	2.14	2.18E-03	1.12E-03
248656_at	At5g48460	fimbrin-like protein, putative	-2.43	-2.81	2.19E-03	9.13E-04
255332_at	At4g04340	early-responsive to dehydration protein-related / ERD protein-related	-1.68	-2.01	2.19E-03	7.70E-03
256482_at	At1g31420	leucine-rich repeat transmembrane protein kinase, putative	-2.07	-2.17	2.19E-03	2.77E-04
260676_at	At1g19450	integral membrane protein, putative / sugar transporter family protein	-3.03	-2.37	2.19E-03	3.00E-04
248686_at	At5g48540	33 kDa secretory protein-related	2.91	3.74	2.20E-03	9.09E-04
252181_at	At3g50685	expressed protein	-3.79	-4.31	2.20E-03	1.13E-04
255829_at	At2g40540	potassium transporter, putative (KT2)	-3.46	-2.99	2.20E-03	8.43E-05
261610_at	At1g49560	myb family transcription factor	-2.31	-2.36	2.20E-03	1.39E-03
266615_s_at	At2g35660 At2g29720	monooxygenase family protein	2.99	2.97	2.20E-03	7.07E-05
267019_at	At2g39130	amino acid transporter family protein	-2.53	-2.36	2.20E-03	9.89E-05
252527_at	At3g46440	NAD-dependent epimerase/dehydratase family protein	1.75	2.27	2.21E-03	1.52E-04
253490_at	At4g31790	diphthine synthase, putative  (DPH5)	2.38	2.61	2.21E-03	2.22E-04
263880_at	At2g21960	expressed protein	-1.89	-2.02	2.21E-03	9.80E-05
246744_at	At5g27760	hypoxia-responsive family protein	2.47	2.16	2.22E-03	1.56E-03
245861_at	At5g28300	trihelix DNA-binding protein, putative	-2.43	-3.00	2.23E-03	5.55E-01
251507_at	At3g59080	aspartyl protease family protein	2.48	2.79	2.23E-03	1.35E-03
252965_at	At4g38860	auxin-responsive protein, putative	-5.81	-7.52	2.23E-03	2.95E-03
256216_at	At1g56340	calreticulin 1 (CRT1)	3.29	3.99	2.23E-03	4.67E-05
256698_at	At3g20680	expressed protein	-2.16	-1.68	2.23E-03	1.22E-05
248287_at	At5g52970	thylakoid lumen 15.0 kDa protein	-3.36	-3.45	2.24E-03	1.21E-04
257377_at	At2g28890	protein phosphatase 2C family protein / PP2C family protein	2.18	2.67	2.24E-03	6.92E-03
266574_at	At2g23890	5' nucleotidase family protein	1.59	2.05	2.24E-03	1.01E-04
256965_at	At3g13450	2-oxoisovalerate dehydrogenase / 3-methyl-2-oxobutanoate dehydrogenase / branched-chain alpha-keto acid dehydrogenase E1 beta subunit (DIN4)	-2.16	-2.09	2.25E-03	3.20E-05
260943_at	At1g45145	thioredoxin H-type 5 (TRX-H-5) (TOUL)	5.63	6.12	2.25E-03	9.13E-04
261230_at	At1g20010	tubulin beta-5 chain (TUB5)	-4.00	-5.29	2.25E-03	6.20E-05
252474_at	At3g46620	zinc finger (C3HC4-type RING finger) family protein	2.23	2.97	2.26E-03	3.04E-03
253954_at	At4g26970	aconitate hydratase, cytoplasmic, putative / citrate hydro-lyase/aconitase, putative	2.01	2.01	2.26E-03	2.56E-04
259037_at	At3g09350	armadillo/beta-catenin repeat family protein	2.28	1.40	2.26E-03	3.22E-04
259773_at	At1g29500	auxin-responsive protein, putative\	-4.61	-5.78	2.27E-03	2.99E-05
247105_at	At5g66630	LIM domain-containing protein	1.71	2.20	2.28E-03	4.43E-04
250680_at	At5g06570	expressed protein	5.85	5.16	2.28E-03	1.24E-04
252421_at	At3g47540	chitinase, putative	2.09	2.93	2.28E-03	7.39E-04
252908_at	At4g39670	expressed protein	2.87	5.30	2.28E-03	4.55E-05
256596_at	At3g28540	AAA-type ATPase family protein	6.79	10.02	2.28E-03	1.36E-04
260221_at	At1g74670	gibberellin-responsive protein, putative	-15.15	-27.62	2.28E-03	1.67E-04
245686_at	At5g22060	DNAJ heat shock protein, putative	3.02	3.16	2.29E-03	6.54E-05
247278_at	At5g64380	fructose-1,6-bisphosphatase family protein	-2.75	-2.40	2.29E-03	7.22E-05
249581_at	At5g37600	glutamine synthetase, putative	2.72	4.09	2.29E-03	5.12E-06
250075_at	At5g17670	expressed protein	-2.26	-2.13	2.29E-03	2.60E-03
260547_at	At2g43550	defensin-like (DEFL) family protein.	-11.88	-17.30	2.29E-03	2.12E-05
263127_at	At1g78610	mechanosensitive ion channel domain-containing protein / MS ion channel domain-containing protein	-1.91	-2.23	2.29E-03	2.63E-02
254083_at	At4g24920	protein transport protein SEC61 gamma subunit, putative	2.23	2.63	2.32E-03	1.23E-03
245318_at	At4g16980	arabinogalactan-protein family	-3.06	-4.31	2.33E-03	1.15E-04
250286_at	At5g13320	auxin-responsive GH3 family protein	1.40	7.90	2.33E-03	2.60E-05
256308_s_at	At1g30420 At1g30410	ATP-binding cassette transport protein, putative	2.16	2.67	2.33E-03	8.62E-04
258151_at	At3g18080	glycosyl hydrolase family 1 protein	-2.31	-3.04	2.33E-03	1.23E-03
259043_at	At3g03440	armadillo/beta-catenin repeat family protein	2.11	2.20	2.33E-03	4.46E-06
265728_at	At2g31990	exostosin family protein	2.22	3.82	2.33E-03	2.67E-04
253597_at	At4g30690	translation initiation factor 3 (IF-3) family protein	-2.45	-3.15	2.38E-03	2.13E-04
256769_at	At3g13690	protein kinase family protein	-2.87	-3.34	2.38E-03	6.76E-03
257171_at	At3g23760	expressed protein	-2.07	-1.69	2.38E-03	2.81E-03
264394_at	At1g11860	aminomethyltransferase, putative	-2.85	-2.38	2.38E-03	7.64E-05
264766_at	At1g61420	S-locus lectin protein kinase family protein	3.25	5.80	2.38E-03	7.07E-05
265853_at	At2g42360	zinc finger (C3HC4-type RING finger) family protein	1.31	2.20	2.38E-03	1.22E-05
245039_at	At2g26600	glycosyl hydrolase family 17 protein	1.63	2.13	2.39E-03	5.01E-04
251884_at	At3g54150	embryo-abundant protein-related	5.53	7.30	2.39E-03	1.80E-04
252429_at	At3g47500	Dof-type zinc finger domain-containing protein	-1.71	-2.37	2.39E-03	2.59E-02
252976_s_at	At4g38550	expressed protein	2.23	2.23	2.39E-03	1.87E-03
259366_at	At1g13280	allene oxide cyclase family protein	-1.49	-2.26	2.39E-03	3.17E-04
259541_at	At1g20650	protein kinase family protein	-2.01	-2.65	2.39E-03	2.92E-04
259787_at	At1g29460	auxin-responsive protein, putative	-2.25	-2.00	2.39E-03	9.74E-04
267569_at	At2g30790	photosystem II oxygen-evolving complex 23, putative	-1.66	-2.44	2.39E-03	1.35E-03
245743_at	At1g51080	expressed protein	-2.23	-2.01	2.40E-03	2.83E-03
246842_at	At5g26731	expressed protein	1.39	2.42	2.40E-03	3.67E-02
247498_at	At5g61810	mitochondrial substrate carrier family protein	-2.27	-2.12	2.40E-03	7.59E-03
259507_at	At1g43910	AAA-type ATPase family protein	1.86	6.75	2.40E-03	8.61E-04
262230_at	At1g68560	alpha-xylosidase (XYL1)	-3.62	-6.25	2.40E-03	4.52E-04
264930_at	At1g60800	leucine-rich repeat family protein / protein kinase family protein	-2.60	-2.49	2.40E-03	1.04E-03
266805_at	At2g30010	expressed protein	-2.92	-3.98	2.40E-03	2.11E-05
267380_at	At2g26170	Enchromboxane-A synthase, putative member of cytochrome P450 family	3.87	3.19	2.40E-03	4.62E-04
246559_at	At5g15550	transducin family protein / WD-40 repeat family protein	1.96	2.29	2.41E-03	5.39E-05
248512_at	At5g50460	protein transport protein SEC61 gamma subunit, putative	2.70	2.93	2.41E-03	4.29E-04
253323_at	At4g33920	protein phosphatase 2C family protein / PP2C family protein	1.48	2.49	2.41E-03	4.31E-02
257533_at	At3g10840	hydrolase, alpha/beta fold family protein	-2.81	-2.60	2.41E-03	9.00E-05
260983_at	At1g53560	expressed protein	-2.44	-3.15	2.41E-03	1.29E-04
265006_at	At1g61570	mitochondrial import inner membrane translocase (TIM13)	2.47	2.69	2.41E-03	3.34E-02
266588_at	At2g14890	arabinogalactan-protein (AGP9)	-3.42	-3.83	2.41E-03	3.54E-04
267162_s_at	At2g37690 At2g05140	phosphoribosylaminoimidazole carboxylase, putative / AIR carboxylase, putative	2.48	2.96	2.42E-03	2.89E-03
248769_at	At5g47730	SEC14 cytosolic factor, putative / polyphosphoinositide-binding protein, putative	2.29	1.90	2.43E-03	4.74E-05
254221_at	At4g23820	glycoside hydrolase family 28 protein / polygalacturonase (pectinase) family protein	-5.88	-9.80	2.43E-03	9.13E-05
259512_at	At1g12360	cytokinesis-related Sec1 protein (KEULE)	1.89	2.05	2.43E-03	8.18E-05
261226_at	At1g20190	expansin, putative (EXP11)	-7.58	-10.74	2.43E-03	5.01E-04
265075_at	At1g55450	embryo-abundant protein-related	2.05	2.17	2.43E-03	2.83E-03
256914_at	At3g23880	F-box family protein	-2.24	-2.56	2.45E-03	8.97E-05
246990_at	At5g67360	cucumisin-like serine protease (ARA12), Asp48	-2.28	-2.01	2.46E-03	9.13E-04
262507_at	At1g11330	S-locus lectin protein kinase family protein	3.25	3.13	2.46E-03	1.50E-03
262648_at	At1g14030	ribulose-1,5 bisphosphate carboxylase oxygenase large subunit N-methyltransferase, putative	-2.29	-2.11	2.46E-03	9.80E-05
264247_at	At1g60160	potassium transporter family protein	-2.38	-2.18	2.47E-03	8.43E-05
267083_at	At2g41100	touch-responsive protein / calmodulin-related protein 3, touch-induced (TCH3)	6.36	8.89	2.47E-03	3.32E-03
253028_at	At4g38160	mitochondrial transcription termination factor-related / mTERF-related	-2.03	-2.16	2.48E-03	8.43E-05
258436_at	At3g16720	zinc finger (C3HC4-type RING finger) family protein	2.69	3.62	2.48E-03	3.30E-04
259792_at	At1g29690	protein containing a domain with significant homology to the MACPF (membrane attack complex and perforin) domain of complements and perforin proteins that are involved in innate immunity in animals	2.10	2.84	2.48E-03	6.75E-03
246831_at	At5g26340	hexose transporter, putative	2.79	2.95	2.49E-03	1.03E-03
249008_at	At5g44680	methyladenine glycosylase family protein	-4.15	-5.52	2.49E-03	2.68E-05
249987_at	At5g18490	expressed protein	2.99	3.39	2.49E-03	1.73E-04
250942_at	At5g03350	legume lectin family protein	8.75	6.82	2.49E-03	1.39E-04
266119_at	At2g02100	plant defensin-fusion protein, putative (PDF2.2)	-4.83	-5.85	2.49E-03	3.39E-05
246850_at	At5g26860	Lon protease, putative	2.36	2.33	2.50E-03	5.77E-04
253522_at	At4g31290	ChaC-like family protein	-6.17	-5.75	2.50E-03	1.22E-04
264851_at	At2g17290	calcium-dependent protein kinase isoform 6 (CPK6)	2.57	3.85	2.52E-03	9.21E-03
260896_at	At1g29310	protein transport protein sec61, putative	2.30	2.49	2.53E-03	1.07E-04
264100_at	At1g78970	lupeol synthase (LUP1) / 2,3-oxidosqualene-triterpenoid cyclase	-2.37	-2.57	2.54E-03	1.49E-04
267436_at	At2g19190	light-responsive receptor protein kinase / senescence-responsive receptor-like serine/threonine kinase, putative (SIRK)	2.60	5.09	2.54E-03	4.34E-05
261449_at	At1g21120	O-methyltransferase, putative	1.44	2.42	2.55E-03	4.67E-05
265319_at	At2g22670	auxin-responsive protein / indoleacetic acid-induced protein 8 (IAA8)	-2.62	-3.53	2.55E-03	1.47E-04
251975_at	At3g53230	cell division cycle protein 48, putative / CDC48, putative	3.35	2.47	2.56E-03	2.20E-03
264708_at	At1g09740	ethylene-responsive protein, putative	2.01	1.74	2.56E-03	2.13E-04
267376_at	At2g26330	leucine-rich repeat protein kinase, putative (ERECTA)	-2.55	-2.65	2.56E-03	2.51E-03
267264_at	At2g22970	serine carboxypeptidase S10 family protein	-3.82	-3.03	2.57E-03	3.06E-05
250189_at	At5g14410	expressed protein	-2.10	-3.02	2.59E-03	3.08E-04
253113_at	At4g35985	senescence/dehydration-associated protein-related	2.36	2.23	2.59E-03	2.29E-04
259983_at	At1g76490	3-hydroxy-3-methylglutaryl-CoA reductase 2 / HMG-CoA reductase 2 (HMGR2)	-2.49	-2.87	2.59E-03	7.74E-05
254571_at	At4g19370	expressed protein	4.70	6.42	2.60E-03	1.14E-04
245788_at	At1g32120	expressed protein	2.25	2.92	2.61E-03	4.23E-04
251169_at	At3g63210	expressed protein	-1.71	-2.84	2.61E-03	1.08E-02
252214_at	At3g50260	DREB subfamily A-5 of ERF/AP2 transcription factor family	5.53	7.39	2.61E-03	1.80E-02
252652_at	At3g44720	prephenate dehydratase family protein	2.34	3.74	2.61E-03	2.50E-04
253581_at	At4g30660	hydrophobic protein, putative / low temperature and salt responsive protein, putative	-2.01	-1.97	2.61E-03	6.20E-03
254011_at	At4g26370	antitermination NusB domain-containing protein	-2.02	-1.69	2.61E-03	1.27E-04
260110_at	At1g63350	disease resistance protein (CC-NBS-LRR class), putative	1.86	2.17	2.61E-03	1.24E-04
262164_at	At1g78070	WD-40 repeat family protein	-2.88	-3.92	2.61E-03	5.85E-05
262188_at	At1g77810	galactosyltransferase family protein	1.57	2.68	2.61E-03	1.22E-04
265967_at	At2g37450	nodulin MtN21 family protein	-3.51	-3.10	2.61E-03	1.38E-04
266311_at	At2g27130	protease inhibitor/seed storage/lipid transfer protein (LTP) family protein	-2.38	-2.75	2.61E-03	2.03E-03
263134_at	At1g78580 At1g78570	alpha-trehalose-phosphate synthase, UDP-forming, putative / trehalose-6-phosphate synthase, putative / UDP-glucose-glucosephosphate glucosyltransferase, putative	2.52	2.63	2.62E-03	5.90E-04
264767_at	At1g61380	S-locus protein kinase, putative	2.04	2.73	2.62E-03	3.67E-03
246197_at	At4g37010	caltractin, putative / centrin, putative	2.22	2.27	2.63E-03	8.31E-04
250423_s_at	At5g10600 At5g10610	cytochrome P450 family protein	1.83	2.13	2.63E-03	8.47E-03
254038_at	At4g25910	nitrogen fixation protein, putative	-2.23	-2.45	2.63E-03	1.74E-04
249078_at	At5g44070	phytochelatin synthase 1 (PCS1)	2.49	2.70	2.64E-03	2.82E-04
254293_at	At4g23060	similar to calmodulin-binding family protein	-1.72	-2.42	2.64E-03	7.51E-04
255889_at	At1g17840	ABC transporter family protein	-2.06	-2.83	2.64E-03	1.03E-02
262072_at	At1g59590	expressed protein	2.51	3.06	2.64E-03	1.20E-03
253412_at	At4g33000	calcineurin B-like protein 10 (CBL10)	-2.88	-3.03	2.66E-03	2.29E-04
265539_at	At2g15830	expressed protein	-2.11	-2.70	2.66E-03	2.61E-04
247071_at	At5g66640	LIM domain-containing protein-related	2.51	4.57	2.68E-03	3.65E-04
264471_at	At1g67120	midasin-related	2.09	2.15	2.68E-03	8.02E-04
245346_at	At4g17090	beta-amylase (CT-BMY) / 1,4-alpha-D-glucan maltohydrolase	-1.74	-2.34	2.69E-03	6.39E-05
246421_at	At5g16880	VHS domain-containing protein / GAT domain-containing protein	2.30	2.43	2.69E-03	2.38E-04
249282_at	At5g41760	nucleotide-sugar transporter family protein	-2.02	-1.56	2.69E-03	3.33E-05
252470_at	At3g46930	protein kinase family protein	1.50	2.31	2.69E-03	4.08E-03
257072_at	At3g14220	GDSL-motif lipase/hydrolase family protein	-1.92	-2.32	2.69E-03	3.08E-02
258203_at	At3g13950	expressed protein	7.49	12.09	2.69E-03	3.93E-05
262275_at	At1g68710	haloacid dehalogenase-like hydrolase family protein	3.77	4.12	2.69E-03	4.85E-05
245712_at	At5g04360	pullulanase, putative / starch debranching enzyme, putative	-1.78	-2.53	2.71E-03	2.49E-02
247470_at	At5g62220	exostosin family protein	-2.42	-2.24	2.71E-03	2.29E-04
248624_at	At5g48790	expressed protein	-3.06	-2.87	2.71E-03	1.28E-04
251745_at	At3g55980	zinc finger (CCCH-type) family protein	6.37	9.51	2.71E-03	1.98E-02
251930_at	At3g53780	rhomboid family protein	1.93	2.07	2.71E-03	1.71E-04
252943_at	At4g39330	mannitol dehydrogenase, putative	-7.58	-11.52	2.71E-03	1.32E-04
253278_at	At4g34220	leucine-rich repeat transmembrane protein kinase, putative	-3.60	-3.94	2.71E-03	4.10E-03
254432_at	At4g20830	FAD-binding domain-containing protein	3.09	3.87	2.71E-03	4.15E-03
256981_at	At3g13380	leucine-rich repeat family protein / protein kinase family protein	1.63	3.13	2.71E-03	1.73E-04
257954_at	At3g21760	UDP-glucoronosyl/UDP-glucosyl transferase family protein	-2.38	-2.82	2.71E-03	7.46E-04
258552_at	At3g07010	pectate lyase family protein	-6.54	-7.94	2.71E-03	8.88E-05
259561_at	At1g21250	wall-associated kinase 1 (WAK1)	3.64	4.12	2.71E-03	5.15E-03
264442_at	At1g27480	lecithin:cholesterol acyltransferase family protein / LACT family protein	-3.86	-2.28	2.71E-03	2.53E-05
267299_at	At2g30150	UDP-glucoronosyl/UDP-glucosyl transferase family protein	-2.78	-2.57	2.71E-03	3.03E-05
250128_at	At5g16540	zinc finger (CCCH-type) family protein	-2.42	-2.02	2.72E-03	2.18E-04
261407_at	At1g18810	phytochrome kinase substrate-related	-1.93	-2.51	2.73E-03	8.10E-03
266757_at	At2g46940	expressed protein	2.32	2.00	2.73E-03	7.94E-05
245417_at	At4g17360	formyltetrahydrofolate deformylase, putative	-2.27	-2.14	2.75E-03	1.09E-04
261149_s_at	At1g19570 At1g19550	dehydroascorbate reductase, putative	-2.20	-3.36	2.77E-03	2.70E-05
254835_s_at	At4g12320 At4g12310	cytochrome P450, putative	-4.22	-3.44	2.79E-03	4.07E-04
252092_at	At3g51420	strictosidine synthase family protein	-2.73	-2.44	2.80E-03	2.09E-04
254815_at	At4g12420	multi-copper oxidase, putative (SKU5)	-5.26	-5.38	2.80E-03	6.02E-05
259783_at	At1g29510	auxin-responsive protein, putative	-4.46	-5.85	2.80E-03	4.19E-05
246483_at	At5g16000	leucine-rich repeat family protein / protein kinase family protein	-2.88	-2.80	2.81E-03	6.15E-04
254375_at	At4g21800	ATP-binding family protein	2.21	3.02	2.81E-03	4.87E-03
254181_at	At4g23940	FtsH protease, putative	-1.96	-2.12	2.83E-03	9.70E-04
254694_at	At4g17900	zinc-binding family protein	2.11	2.45	2.83E-03	2.05E-03
257903_at	At3g28460	expressed protein	-1.89	-2.56	2.83E-03	1.09E-03
262612_at	At1g14150	oxygen evolving enhancer 3 (PsbQ) family protein, extrinsic pII protein	-6.33	-3.76	2.83E-03	5.29E-05
254662_at	At4g18270	glycosyl transferase family 4 protein	-2.87	-3.39	2.84E-03	4.32E-03
261450_s_at	At1g21110 At1g21120	O-methyltransferase, putative	2.59	5.21	2.84E-03	7.36E-05
266447_at	At2g43290	calmodulin-like protein (MSS3)	-1.03	2.14	2.84E-03	2.13E-01
245976_at	At5g13080	WRKY family transcription factor	4.65	18.57	2.85E-03	3.93E-05
246995_at	At5g67470	formin homology 2 domain-containing protein / FH2 domain-containing protein	1.43	2.38	2.85E-03	1.16E-03
247541_at	At5g61660	glycine-rich protein	-2.14	-2.15	2.85E-03	1.92E-03
250955_at	At5g03190	expressed protein	-2.31	-2.68	2.85E-03	4.29E-03
253042_at	At4g37550	formamidase, putative / formamide amidohydrolase, putative	-2.15	-2.70	2.85E-03	1.22E-04
256514_at	At1g66130	oxidoreductase N-terminal domain-containing protein	-2.71	-2.35	2.85E-03	1.70E-05
257444_at	At2g12550	ubiquitin-associated (UBA)/TS-N domain-containing protein	1.93	2.05	2.85E-03	3.62E-05
259560_at	At1g21270	wall-associated kinase 2 (WAK2)	1.85	2.42	2.85E-03	1.14E-02
263419_at	At2g17220	protein kinase, putative	2.21	2.19	2.85E-03	1.86E-04
266928_at	At2g45790	eukaryotic phosphomannomutase family protein	1.56	2.01	2.86E-03	8.62E-04
251762_at	At3g55800	chloroplast enzyme sedoheptulose-1,7-bisphosphatase (SBPase)	-2.23	-1.90	2.88E-03	2.46E-04
247835_at	At5g57910	expressed protein	3.44	3.25	2.89E-03	4.37E-03
250006_at	At5g18660	protein with 3,8-divinyl protochlorophyllide a 8-vinyl reductase activity	-5.95	-6.54	2.89E-03	7.02E-04
255579_at	At4g01460	basic helix-loop-helix (bHLH) family protein	-2.99	-4.39	2.89E-03	1.73E-04
259502_at	At1g15670	kelch repeat-containing F-box family protein	6.52	7.01	2.89E-03	3.62E-03
260542_at	At2g43560	immunophilin / FKBP-type peptidyl-prolyl cis-trans isomerase family protein	-1.86	-2.23	2.89E-03	2.57E-03
264900_at	At1g23080	auxin efflux carrier protein, putative	-2.67	-2.96	2.89E-03	2.02E-04
266285_at	At2g29180	expressed protein	-2.51	-2.24	2.89E-03	4.83E-04
267092_at	At2g38120	amino acid permease, putative (AUX1)	-2.60	-2.82	2.89E-03	1.76E-04
249810_at	At5g23920	expressed protein	-2.51	-1.79	2.90E-03	3.10E-05
258156_at	At3g18050	expressed protein	-2.72	-4.05	2.90E-03	1.77E-04
259655_at	At1g55210	disease resistance response  protein-related/ dirigent  protein-related	-1.20	2.95	2.90E-03	6.25E-04
266968_at	At2g39360	protein kinase family protein	1.08	2.12	2.90E-03	8.58E-01
258915_at	At3g10640	SNF7 family protein	1.91	2.97	2.91E-03	8.83E-03
264757_at	At1g61360	S-locus lectin protein kinase family protein	2.55	3.10	2.91E-03	1.64E-04
251121_at	At3g63420	heterotrimeric G protein gamma-subunit (AGG1)	2.13	2.09	2.92E-03	4.64E-04
264424_at	At1g61740	expressed protein	-1.55	-2.45	2.93E-03	2.77E-04
251500_at	At3g59110	protein kinase family protein	-1.60	-2.11	2.94E-03	2.50E-03
260968_at	At1g12250	thylakoid lumenal protein-related	-2.00	-2.07	2.95E-03	7.38E-05
263536_at	At2g25000	WRKY family transcription factor	3.67	5.75	2.95E-03	3.53E-05
247125_at	At5g66070	zinc finger (C3HC4-type RING finger) family protein	1.85	2.05	2.97E-03	1.13E-04
250437_at	At5g10430	arabinogalactan-protein (AGP4)	-1.73	-2.22	2.97E-03	1.64E-04
253860_at	At4g27700	rhodanese-like domain-containing protein	-2.10	-2.70	2.97E-03	7.43E-04
258613_at	At3g02870	inositol-1(or 4)-monophosphatase, putative / inositol monophosphatase, putative / IMPase, putative	-2.26	-1.76	2.97E-03	1.47E-03
267294_at	At2g23670	expressed protein	-2.28	-2.20	2.97E-03	4.24E-03
245399_at	At4g17340	major intrinsic family protein / MIP family protein	-2.73	-2.75	2.98E-03	1.46E-03
258606_at	At3g02840 At3g02850	immediate-early fungal elicitor family protein	1.56	3.14	2.98E-03	5.39E-05
259495_at	At1g15890	disease resistance protein (CC-NBS-LRR class), putative	1.61	2.04	2.98E-03	4.73E-02
259207_at	At3g09050	expressed protein	-2.50	-2.00	2.99E-03	9.13E-04
255674_at	At4g00430	plasma membrane intrinsic protein, putative	-2.74	-2.46	3.00E-03	1.60E-04
251443_at	At3g59940	kelch repeat-containing F-box family protein	-1.28	-2.68	3.02E-03	3.49E-05
252972_at	At4g38840	auxin-responsive protein, putative	-3.97	-4.12	3.02E-03	4.10E-03
256671_at	At3g52290	calmodulin-binding family protein	-1.87	-2.49	3.02E-03	2.29E-04
258262_at	At3g15770	expressed protein	1.45	2.49	3.02E-03	3.22E-01
262717_s_at	At1g16410 At1g16400	cytochrome P450, putative	-2.57	-2.78	3.02E-03	1.65E-02
264666_at	At1g09680	pentatricopeptide (PPR) repeat-containing protein	1.85	2.32	3.02E-03	1.13E-04
265884_at	At2g42320	nucleolar protein gar2-related	-1.88	-2.27	3.02E-03	6.02E-05
251230_at	At3g62750	glycosyl hydrolase family 1 protein	-3.77	-4.08	3.03E-03	3.30E-04
260714_at	At1g14980	10 kDa chaperonin (CPN10)	2.44	1.98	3.03E-03	6.59E-03
266461_at	At2g47730	glutathione S-transferase 6 (GST6)	3.07	2.13	3.04E-03	4.13E-04
245042_at	At2g26540	uroporphyrinogen-III synthase family protein	-1.74	-2.58	3.05E-03	2.22E-04
247819_at	At5g58350	protein kinase family protein	2.89	3.00	3.05E-03	1.33E-03
248224_at	At5g53490	thylakoid lumenal 17.4 kDa protein, chloroplast	-2.43	-2.28	3.05E-03	6.92E-05
265704_at	At2g03420	expressed protein	-3.28	-3.21	3.05E-03	8.65E-05
247684_at	At5g59670	leucine-rich repeat protein kinase, putative	2.54	3.63	3.06E-03	7.59E-07
255774_at	At1g18620	expressed protein	-5.71	-9.17	3.06E-03	9.17E-05
252117_at	At3g51430	strictosidine synthase, putative (YLS2)	3.31	3.11	3.07E-03	4.92E-04
252143_at	At3g51150	kinesin motor family protein	-2.28	-2.90	3.07E-03	7.30E-04
253049_at	At4g37300	expressed protein	-2.33	-2.99	3.07E-03	7.51E-05
254794_at	At4g12970	expressed protein	-4.46	-4.69	3.07E-03	1.34E-03
259081_at	At3g05030	sodium proton exchanger, putative (NHX2)	-2.43	-2.70	3.07E-03	5.55E-03
259534_at	At1g12290	disease resistance protein (CC-NBS-LRR class), putative	2.03	5.52	3.07E-03	6.88E-04
262607_at	At1g13990	expressed protein	2.13	1.95	3.07E-03	3.98E-03
267432_at	At2g35020	UTP--glucose-1-phosphate uridylyltransferase family protein	1.33	2.31	3.08E-03	3.93E-05
253747_at	At4g29050	lectin protein kinase family protein	2.01	2.25	3.09E-03	4.92E-04
247878_at	At5g57770 At5g57760	expressed protein	-1.81	-2.35	3.10E-03	7.08E-05
250167_at	At5g15310	myb family transcription factor	-2.23	-3.10	3.11E-03	1.25E-04
252483_at	At3g46600	scarecrow transcription factor family protein, scarecrow-like 11	3.22	3.15	3.11E-03	1.02E-02
255623_at	At4g01310	ribosomal protein L5 family protein	-2.82	-3.12	3.11E-03	6.11E-04
263799_at	At2g24550	expressed protein	3.03	2.62	3.11E-03	8.79E-02
259823_at	At1g66250	glycosyl hydrolase family 17 protein	-1.04	2.41	3.12E-03	1.07E-04
264435_at	At1g10360	glutathione S-transferase, putative	-4.81	-4.63	3.14E-03	1.49E-04
264669_at	At1g09630	Ras-related GTP-binding protein, putative	1.92	2.05	3.14E-03	2.46E-03
247338_at	At5g63680	pyruvate kinase, putative	1.68	2.07	3.15E-03	4.35E-04
248941_s_at	At5g45460 At5g45470	expressed protein	2.43	2.95	3.15E-03	3.68E-05
250670_at	At5g06860	polygalacturonase inhibiting protein 1 (PGIP1)	2.49	1.91	3.15E-03	1.32E-03
251839_at	At3g54950	patatin-related	2.16	2.58	3.15E-03	1.55E-02
260243_at	At1g63720	expressed protein	2.98	3.76	3.15E-03	5.30E-04
267004_at	At2g34260	transducin family protein / WD-40 repeat family protein	2.13	2.14	3.15E-03	1.44E-03
252400_at	At3g48020	expressed protein	2.89	2.57	3.16E-03	1.39E-03
259307_at	At3g05230	signal peptidase subunit family protein	1.86	2.68	3.16E-03	5.17E-03
261661_at	At1g18360	hydrolase, alpha/beta fold family protein	-2.58	-3.68	3.16E-03	2.12E-03
262748_at	At1g28610	GDSL-motif lipase, putative	-1.86	-2.11	3.16E-03	1.80E-04
257280_at	At3g14440	9-cis-epoxycarotenoid dioxygenase, putative / neoxanthin cleavage enzyme, putative / carotenoid cleavage dioxygenase, putative	-2.09	-2.96	3.17E-03	2.13E-03
245338_at	At4g16442	integral membrane family protein	-1.95	-2.38	3.18E-03	6.64E-04
246339_at	At3g44890	50S ribosomal protein L9, chloroplast (CL9)	-2.26	-2.43	3.18E-03	1.93E-03
248123_at	At5g54720	ankyrin repeat family protein	3.06	6.05	3.18E-03	4.36E-04
252324_at	At3g48570	protein transport protein SEC61 gamma subunit, putative	1.87	2.34	3.18E-03	4.47E-03
255753_at	At1g18570	myb family transcription factor (MYB51)	7.34	9.27	3.18E-03	1.32E-03
251243_at	At3g61870	expressed protein	-2.54	-1.87	3.19E-03	7.41E-05
254256_at	At4g23180	receptor-like protein kinase 4, putative (RLK4)	2.20	2.61	3.20E-03	2.66E-02
261921_at	At1g65900	expressed protein	-3.46	-4.31	3.20E-03	4.81E-03
267537_at	At2g41880	guanylate kinase 1 (GK-1)	1.91	2.19	3.20E-03	5.82E-04
246529_at	At5g15730	serine/threonine protein kinase, putative	2.12	2.62	3.21E-03	1.10E-03
249606_at	At5g37260	myb family transcription factor	-2.62	-3.82	3.21E-03	1.09E-04
251601_at	At3g57800	basic helix-loop-helix (bHLH) family protein	-2.03	-2.04	3.21E-03	7.64E-05
251673_at	At3g57240	glycosyl hydrolase family 17 protein	12.74	14.99	3.21E-03	1.23E-03
259928_at	At1g34380	5'-3' exonuclease family protein	1.43	2.03	3.21E-03	1.91E-03
254215_at	At4g23700	cation/hydrogen exchanger, putative (CHX17)	1.63	3.85	3.22E-03	1.01E-04
251199_at	At3g62980	transport inhibitor response 1 (TIR1) (FBL1), E3 ubiquitin ligase SCF complex F-box subunit	-1.70	-2.04	3.23E-03	2.78E-03
253915_at	At4g27280	calcium-binding EF hand family protein	10.24	16.24	3.23E-03	4.15E-03
258750_at	At3g05910	pectinacetylesterase, putative	-3.03	-3.34	3.24E-03	1.60E-04
263827_at	At2g40420	amino acid transporter family protein	-2.16	-2.04	3.27E-03	3.36E-04
247429_at	At5g62620	galactosyltransferase family protein	1.96	2.87	3.28E-03	1.54E-03
261507_at	At1g71720	S1 RNA-binding domain-containing protein	-2.36	-2.38	3.28E-03	1.43E-03
262397_at	At1g49380	cytochrome c biogenesis protein family	-3.16	-3.09	3.28E-03	4.11E-04
249118_at	At5g43870	expressed protein	-2.09	-2.21	3.29E-03	4.02E-04
245747_at	At1g51100	expressed protein	-1.92	-2.02	3.30E-03	4.67E-03
261063_at	At1g07520	scarecrow transcription factor family protein	2.04	2.49	3.30E-03	5.99E-04
245348_at	At4g17770	glycosyl transferase family 20 protein / trehalose-phosphatase family protein	-2.29	-2.21	3.31E-03	3.18E-03
247316_at	At5g64030	dehydration-responsive protein-related	-2.25	-1.74	3.31E-03	4.01E-04
255923_at	At1g22180	SEC14 cytosolic factor family protein / phosphoglyceride transfer family protein	1.73	2.27	3.31E-03	1.23E-02
257277_at	At3g14470	disease resistance protein (NBS-LRR class), putative	2.55	3.33	3.31E-03	5.95E-04
260734_at	At1g17600	disease resistance protein (TIR-NBS-LRR class), putative	2.01	3.44	3.31E-03	1.67E-03
256088_at	At1g20810	immunophilin / FKBP-type peptidyl-prolyl cis-trans isomerase family protein	-1.95	-2.01	3.33E-03	7.86E-04
265450_at	At2g46620	AAA-type ATPase family protein	2.35	2.77	3.34E-03	2.45E-04
250248_at	At5g13740	sugar transporter family protein	-1.67	-2.67	3.35E-03	1.13E-04
262830_at	At1g14700	purple acid phosphatase, putative	-3.34	-3.56	3.36E-03	2.70E-04
257624_at	At3g26220	cytochrome P450 family protein	2.88	3.91	3.38E-03	4.69E-03
267377_at	At2g26250	beta-ketoacyl-CoA synthase family (FIDDLEHEAD) (FDH)	-1.78	-2.62	3.38E-03	3.02E-04
251015_at	At5g02480	expressed protein	-2.23	-2.57	3.39E-03	5.06E-03
254553_at	At4g19530	disease resistance protein (TIR-NBS-LRR class), putative	-2.57	-2.58	3.39E-03	3.30E-04
263854_at	At2g04430	MutT/nudix family protein	1.82	2.98	3.39E-03	1.42E-04
246097_at	At5g20270	expressed protein	-3.07	-3.13	3.40E-03	1.08E-04
255428_at	At4g03390	leucine-rich repeat transmembrane protein kinase, putative	-2.16	-1.98	3.40E-03	1.88E-02
256265_at	At3g12220	serine carboxypeptidase S10 family protein	3.14	3.46	3.40E-03	7.22E-05
260260_at	At1g68540	oxidoreductase family protein	-3.17	-2.74	3.40E-03	7.50E-05
248794_at	At5g47220	subfamily B-3 of ERF/AP2 transcription factor family (ATERF-2)	3.84	4.82	3.41E-03	3.91E-03
255692_at	At4g00400	phospholipid/glycerol acyltransferase family protein	-3.57	-5.81	3.42E-03	5.87E-04
246018_at	At5g10695	expressed protein	3.34	4.54	3.43E-03	8.94E-03
246035_at	At5g08300	succinyl-CoA ligase (GDP-forming) alpha-chain, mitochondrial, putative / succinyl-CoA synthetase, alpha chain, putative / SCS-alpha, putative	1.70	2.17	3.43E-03	1.32E-02
247201_at	At5g65220	ribosomal protein L29 family protein	-2.01	-2.05	3.43E-03	7.32E-04
247549_at	At5g61420	myb family transcription factor (MYB28)	-2.64	-2.70	3.43E-03	1.10E-05
248766_at	At5g47580	expressed protein	1.95	2.47	3.43E-03	3.40E-03
253550_at	At4g30960	CBL-interacting protein kinase 6 (CIPK6)	-1.79	-3.11	3.43E-03	1.27E-03
AFFX-Athal-GAPDH_3_s_at	At3g04120	glyceraldehyde-3-phosphate dehydrogenase, cytosolic (GAPC) / NAD-dependent glyceraldehyde-3-phosphate dehydrogenase	1.37	2.00	3.43E-03	1.96E-03
249481_at	At5g38900	DSBA oxidoreductase family protein	2.19	6.87	3.46E-03	5.53E-05
264929_at	At1g60730	aldo/keto reductase family protein	2.75	2.48	3.46E-03	1.41E-04
265053_at	At1g52000	jacalin lectin family protein	-4.46	-4.42	3.46E-03	3.35E-04
266181_at	At2g02390	glutathione S-transferase zeta 1 (GSTZ1) (GST18)	2.36	2.16	3.46E-03	4.48E-03
249002_at	At5g44520	ribose 5-phosphate isomerase-related	-2.08	-2.05	3.47E-03	4.50E-04
260548_at	At2g43360	biotin synthase (BioB) (BIO2)	-2.43	-2.64	3.47E-03	1.04E-03
265454_at	At2g46530	transcriptional factor B3 family protein / auxin-responsive factor AUX/IAA-related	-2.75	-2.92	3.47E-03	1.22E-03
258977_s_at	At3g02020 At5g14060	aspartate kinase, lysine-sensitive, putative	-1.95	-2.57	3.48E-03	7.72E-03
245980_at	At5g13140	expressed protein	-7.75	-8.77	3.49E-03	3.29E-04
247814_at	At5g58310	hydrolase, alpha/beta fold family protein	-3.56	-4.05	3.49E-03	9.66E-05
247037_at	At5g67070	rapid alkalinization factor (RALF) family protein	-4.03	-5.59	3.50E-03	7.38E-05
249140_at	At5g43190	F-box family protein (FBX6)	1.98	2.39	3.50E-03	1.34E-02
257295_at	At3g17420	protein kinase family protein	1.36	2.80	3.50E-03	5.80E-05
257964_at	At3g19850	phototropic-responsive NPH3 family protein	-3.62	-5.08	3.50E-03	1.84E-04
258851_at	At3g03190	glutathione S-transferase, putative	-3.38	-3.69	3.50E-03	1.02E-02
261402_at	At1g79670	wall-associated kinase, putative	1.60	2.29	3.50E-03	1.56E-03
264746_at	At1g62300	WRKY family transcription factor	2.19	2.04	3.50E-03	4.11E-03
251676_at	At3g57320	expressed protein	-2.30	-2.79	3.51E-03	9.09E-05
260635_at	At1g62420	expressed protein	2.08	3.04	3.51E-03	1.07E-03
261622_at	At1g01970	pentatricopeptide (PPR) repeat-containing protein	-2.08	-1.93	3.51E-03	2.27E-03
251714_at	At3g56370	leucine-rich repeat transmembrane protein kinase, putative	-4.02	-3.62	3.52E-03	3.08E-04
266279_at	At2g29290	tropinone reductase, putative / tropine dehydrogenase, putative	-3.15	-5.24	3.53E-03	1.71E-05
262809_at	At1g11720	starch synthase, putative	-2.58	-2.11	3.54E-03	8.59E-03
265042_at	At1g04040	acid phosphatase class B family protein	-5.71	-6.80	3.54E-03	1.38E-04
249994_at	At5g18590	kelch repeat-containing protein	-1.83	-2.08	3.56E-03	3.59E-03
266951_at	At2g18940	pentatricopeptide (PPR) repeat-containing protein	-2.06	-1.61	3.58E-03	8.71E-05
249372_at	At5g40760	cytosolic glucose-6-phosphate dehydrogenase that is insensitive to reduction by DTT	2.92	2.44	3.61E-03	9.70E-04
252281_at	At3g49320	expressed protein	2.09	2.58	3.61E-03	6.46E-05
257868_at	At3g25070	RPM1-interacting protein 4 (RIN4)	2.16	1.85	3.61E-03	3.87E-03
249580_at	At5g37740	C2 domain-containing protein	1.85	2.27	3.62E-03	1.70E-02
252353_at	At3g48200	expressed protein	-3.52	-2.20	3.62E-03	1.64E-04
258063_at	At3g14620	cytochrome P450, putative	2.52	1.94	3.62E-03	1.09E-02
262727_at	At1g75800	pathogenesis-related thaumatin family protein	-1.82	-2.00	3.62E-03	4.06E-05
266983_at	At2g39400	hydrolase, alpha/beta fold family protein	1.76	2.32	3.62E-03	8.45E-08
246011_at	At5g08330	TCP family transcription factor, putative	-2.37	-2.99	3.64E-03	3.35E-05
249583_at	At5g37770	touch-responsive protein / calmodulin-related protein 2, touch-induced (TCH2)	1.34	3.05	3.64E-03	1.36E-03
258818_at	At3g04580	ethylene receptor, putative (EIN4)	1.57	2.29	3.64E-03	2.02E-04
262656_at	At1g14200	zinc finger (C3HC4-type RING finger) family protein	2.22	1.83	3.64E-03	1.62E-02
247216_at	At5g64860	4-alpha-glucanotransferase, putative / disproportionating enzyme, putative	-2.20	-2.40	3.65E-03	6.55E-04
258025_at	At3g19480 At3g19490	D-3-phosphoglycerate dehydrogenase, putative / 3-PGDH, putative	-1.94	-2.06	3.65E-03	4.01E-04
247320_at	At5g64040	photosystem I reaction center subunit PSI-N, chloroplast, putative / PSI-N, putative (PSAN)	-2.12	-3.47	3.66E-03	7.15E-05
264313_at	At1g70410	carbonic anhydrase, putative / carbonate dehydratase, putative	-1.95	-2.34	3.66E-03	3.08E-04
254253_at	At4g23320	protein kinase family protein	2.17	3.56	3.67E-03	2.31E-03
262567_at	At1g34300	lectin protein kinase family protein	2.29	1.91	3.67E-03	2.05E-04
266385_at	At2g14610	pathogenesis-related protein 1 (PR-1)	29.50	82.18	3.67E-03	2.88E-05
254605_at	At4g18950	ankyrin protein kinase, putative	1.99	2.20	3.68E-03	2.91E-01
251575_at	At3g58120	bZIP transcription factor family protein	-5.21	-5.81	3.69E-03	6.20E-05
254636_at	At4g18700	CBL-interacting protein kinase 12 (CIPK12)	-1.64	-2.18	3.69E-03	1.12E-04
262288_at	At1g70760	inorganic carbon transport protein-related	-3.37	-2.87	3.69E-03	5.13E-05
266509_at	At2g47940	DegP2 protease (DEGP2)	-2.24	-2.83	3.69E-03	2.11E-03
246159_at	At5g20935	expressed protein	-2.82	-2.40	3.70E-03	2.16E-04
249658_s_at	At5g36790 At5g36700	phosphoglycolate phosphatase, putative	-2.30	-1.86	3.70E-03	1.13E-04
250062_at	At5g17760	AAA-type ATPase family protein	2.02	3.97	3.70E-03	1.65E-03
256129_at	At1g18210	calcium-binding protein, putative	2.46	2.50	3.70E-03	3.56E-04
257763_s_at	At3g23120 At3g23110	leucine-rich repeat family protein	3.21	4.71	3.70E-03	1.67E-02
262165_at	At1g75020	phospholipid/glycerol acyltransferase family protein	1.72	2.60	3.70E-03	4.66E-02
263749_at	At2g21520	SEC14 cytosolic factor, putative / phosphoglyceride transfer protein,	1.80	2.06	3.70E-03	1.41E-04
265076_at	At1g55490	RuBisCO subunit binding-protein beta subunit, chloroplast / 60 kDa chaperonin beta subunit / CPN-60 beta	-3.18	-2.96	3.70E-03	5.75E-04
266570_at	At2g24090	ribosomal protein L35 family protein	-2.19	-1.97	3.70E-03	3.43E-04
254563_at	At4g19120	early-responsive to dehydration stress protein (ERD3)	-2.83	-3.07	3.71E-03	7.66E-04
246919_at	At5g25460	expressed protein	-4.48	-6.99	3.73E-03	8.69E-05
248970_at	At5g45380	sodium:solute symporter family protein	3.92	3.86	3.73E-03	1.39E-03
249397_at	At5g40230	nodulin-related	2.06	2.82	3.73E-03	4.58E-05
263773_at	At2g21370	xylulose kinase, putative	-2.08	-2.46	3.73E-03	7.82E-03
251008_at	At5g02710	expressed protein	-2.10	-1.55	3.74E-03	9.21E-05
252482_at	At3g46670	UDP-glucoronosyl/UDP-glucosyl transferase family protein	-1.85	-2.38	3.74E-03	1.36E-04
252950_at	At4g38690	1-phosphatidylinositol phosphodiesterase-related	-2.58	-3.37	3.74E-03	2.59E-05
256933_at	At3g22600	protease inhibitor/seed storage/lipid transfer protein (LTP) family protein	3.35	9.16	3.75E-03	1.52E-03
257773_at	At3g29185	similar to WRKY11 [Oryza sativa (japonica cultivar-group)]	-2.27	-2.33	3.75E-03	4.51E-04
258577_at	At3g04220	disease resistance protein (TIR-NBS-LRR class), putative	1.18	2.08	3.75E-03	3.89E-02
258002_at	At3g28930	avrRpt2-induced AIG2 protein (AIG2)	2.95	2.94	3.76E-03	7.65E-03
260996_at	At1g12210	disease resistance protein (CC-NBS-LRR class), putative	1.84	2.51	3.77E-03	1.62E-03
254242_at	At4g23200	protein kinase family protein	1.76	4.37	3.78E-03	5.95E-05
266216_at	At2g28810	Dof-type zinc finger domain-containing protein	-1.78	-2.02	3.79E-03	4.25E-01
245816_at	At1g26210	expressed protein	-2.04	-2.34	3.82E-03	6.44E-07
249974_at	At5g18780	F-box family protein	2.60	2.44	3.82E-03	1.07E-03
259598_at	At1g27980	pyridoxal-dependent decarboxylase family protein	2.32	2.68	3.82E-03	1.40E-03
248235_at	At5g53860	expressed protein	-2.05	-1.80	3.83E-03	4.69E-04
257592_at	At3g24982	disease resistance family protein	2.03	4.62	3.83E-03	7.03E-04
259658_at	At1g55370	expressed protein	-3.03	-2.87	3.83E-03	2.67E-04
259790_s_at	At1g29430 At5g27780	auxin-responsive family protein	-2.27	-1.66	3.83E-03	1.33E-02
262126_at	At1g59620	disease resistance protein (CC-NBS class), putative	1.81	2.07	3.83E-03	8.06E-04
252280_at	At3g49260	calmodulin-binding family protein	-3.69	-5.26	3.84E-03	2.04E-03
259550_at	At1g35230	arabinogalactan-protein (AGP5)	4.19	9.70	3.84E-03	2.18E-04
259839_at	At1g52190	proton-dependent oligopeptide transport (POT) family protein	-4.76	-6.41	3.86E-03	5.15E-04
260685_at	At1g17650	6-phosphogluconate dehydrogenase NAD-binding domain-containing protein	-2.55	-3.76	3.86E-03	3.08E-04
260696_at	At1g32520	expressed protein	-2.56	-2.14	3.86E-03	3.79E-02
253482_at	At4g31985	60S ribosomal protein L39 (RPL39C)	1.83	2.22	3.87E-03	2.02E-01
248092_at	At5g55170	small ubiquitin-like modifier 3 (SUMO)	4.20	3.48	3.88E-03	2.45E-04
246371_at	At1g51940	protein kinase family protein / peptidoglycan-binding LysM domain-containing protein	-2.31	-2.02	3.89E-03	4.34E-05
255795_at	At2g33380	calcium-binding RD20 protein (RD20)	-3.36	-4.61	3.89E-03	2.70E-04
261456_at	At1g21050	expressed protein	3.99	2.80	3.89E-03	7.21E-05
261938_at	At1g22510	zinc finger (C3HC4-type RING finger) family protein	1.76	2.25	3.89E-03	4.01E-05
266319_s_at	At3g10280 At2g46720	fatty acid elongase 3-ketoacyl-CoA synthase, putative	-1.57	-2.04	3.89E-03	3.98E-02
267116_at	At2g32560	F-box family protein	-1.95	-2.46	3.89E-03	1.36E-04
247435_at	At5g62480	glutathione S-transferase, putative	2.25	3.81	3.90E-03	1.47E-04
266087_at	At2g37790	aldo/keto reductase family protein	-1.89	-2.56	3.90E-03	5.19E-05
250948_at	At5g03490	UDP-glucoronosyl/UDP-glucosyl transferase family protein	2.03	1.70	3.94E-03	2.08E-02
264901_at	At1g23090	sulfate transporter, putative	2.45	2.33	3.95E-03	2.04E-03
267606_at	At2g26640	beta-ketoacyl-CoA synthase, putative	-2.49	-3.15	3.95E-03	4.73E-03
253654_at	At4g30060	expressed protein	1.42	2.05	4.01E-03	1.36E-04
258845_at	At3g03150	expressed protein	-1.81	-2.23	4.02E-03	4.34E-05
250244_at	At5g13680	IKI3 family protein	2.48	3.26	4.03E-03	6.22E-04
262085_at	At1g56060	expressed protein	1.62	2.48	4.03E-03	9.82E-04
262910_at	At1g59710	expressed protein	2.20	2.19	4.03E-03	3.26E-03
264314_at	At1g70420	expressed protein	-1.72	-2.79	4.03E-03	1.94E-03
245755_at	At1g35210	expressed protein	3.56	6.80	4.04E-03	1.33E-03
251524_at	At3g58990	aconitase C-terminal domain-containing protein	-3.39	-3.61	4.04E-03	5.95E-04
255104_at	At4g08690 At4g08685	SEC14 cytosolic factor family protein / phosphoglyceride transfer family protein	-3.23	-3.69	4.04E-03	2.13E-04
257272_at	At3g28130	nodulin MtN21 family protein	-4.22	-4.48	4.04E-03	6.75E-04
263583_at	At2g17130	isocitrate dehydrogenase subunit 2 / NAD+ isocitrate dehydrogenase subunit 2	1.81	2.14	4.04E-03	9.73E-04
256015_at	At1g19150	chlorophyll A-B binding protein, putative / LHCI type II, putative	-10.83	-8.62	4.05E-03	7.79E-05
252366_at	At3g48420	haloacid dehalogenase-like hydrolase family protein	-3.33	-4.10	4.06E-03	1.24E-04
251427_at	At3g60130	glycosyl hydrolase family 1 protein / beta-glucosidase, putative (YLS1)	-1.81	-2.71	4.07E-03	1.60E-04
260236_at	At1g74470	geranylgeranyl reductase	-1.81	-2.53	4.07E-03	1.73E-04
254673_at	At4g18430	Ras-related GTP-binding protein, putative	3.08	4.92	4.09E-03	3.93E-05
262312_at	At1g70830	Bet v I allergen family protein	-1.80	-2.42	4.09E-03	1.18E-04
252911_at	At4g39510	cytochrome P450 family protein	-2.47	-2.65	4.11E-03	2.49E-03
257190_at	At3g13120	30S ribosomal protein S10, chloroplast, putative	-2.22	-2.42	4.11E-03	2.18E-04
254831_at	At4g12600	ribosomal protein L7Ae/L30e/S12e/Gadd45 family protein	2.02	2.06	4.12E-03	1.22E-03
264866_at	At1g24140	matrixin family protein	7.59	11.49	4.14E-03	2.72E-03
247594_at	At5g60800	heavy-metal-associated domain-containing protein	3.23	4.98	4.15E-03	6.26E-03
248164_at	At5g54490	calcium-binding EF-hand protein, putative	4.66	8.94	4.15E-03	5.42E-03
253411_at	At4g32980	homeobox protein (ATH1)	-2.48	-2.24	4.15E-03	6.73E-04
260565_at	At2g43800	formin homology 2 domain-containing protein / FH2 domain-containing protein	-2.14	-2.40	4.15E-03	5.82E-04
263401_at	At2g04070	MATE efflux family protein	2.42	4.04	4.15E-03	3.65E-04
251395_at	At2g45470	fasciclin-like arabinogalactan-protein (FLA8)	-4.95	-6.90	4.19E-03	2.75E-04
259878_at	At1g76790	O-methyltransferase family 2 protein	-3.73	-7.14	4.19E-03	8.88E-05
247795_at	At5g58620	zinc finger (CCCH-type) family protein	1.48	2.10	4.20E-03	6.93E-04
262170_at	At1g74940	senescence-associated protein-related	-1.50	-2.10	4.20E-03	9.92E-03
266813_at	At2g44920	thylakoid lumenal 15 kDa protein, chloroplast	-2.36	-2.70	4.20E-03	1.36E-03
246019_at	At5g10690	pentatricopeptide (PPR) repeat-containing protein / CBS domain-containing protein, contains CBS and PPR domain repeats	-2.67	-2.55	4.21E-03	1.48E-03
252463_at	At3g47070	expressed protein	-2.23	-1.53	4.21E-03	5.60E-04
248004_at	At5g56230	prenylated rab acceptor (PRA1) family protein	2.56	2.40	4.23E-03	2.51E-03
249144_at	At5g43270	squamosa promoter-binding protein-like 2 (SPL2)	-3.30	-3.07	4.23E-03	1.08E-04
251176_at	At3g63380	calcium-transporting ATPase, plasma membrane-type, putative / Ca(2+)-ATPase, putative (ACA12)	3.94	8.38	4.23E-03	5.82E-05
265868_at	At2g01650	zinc finger (C2H2 type) family protein	2.35	2.85	4.23E-03	8.96E-04
249524_at	At5g38520	hydrolase, alpha/beta fold family protein	-4.55	-2.76	4.24E-03	1.37E-04
258119_at	At3g14720	mitogen-activated protein kinase, putative / MAPK, putative (MPK19)	-1.77	-2.14	4.24E-03	3.53E-03
252215_at	At3g50240	kinesin motor protein-related	-2.01	-2.43	4.25E-03	2.52E-03
253197_at	At4g35250	vestitone reductase-related	-2.25	-2.27	4.26E-03	1.35E-03
257021_at	At3g19710	branched-chain amino acid aminotransferase, putative / branched-chain amino acid transaminase, putative (BCAT4)	-2.22	-2.51	4.26E-03	2.99E-04
265087_at	At1g03760	prefoldin subunit family protein	2.04	1.89	4.26E-03	1.70E-04
255874_at	At2g40550	expressed protein	1.97	2.05	4.28E-03	3.77E-03
257022_at	At3g19580	zinc finger (C2H2 type) protein 2 (AZF2)	2.69	2.13	4.28E-03	4.39E-05
255662_at	At4g00400	phospholipid/glycerol acyltransferase family protein	-3.52	-4.41	4.29E-03	1.55E-04
258107_at	At3g23560	MATE efflux family protein	2.62	2.23	4.29E-03	1.12E-02
267624_at	At2g39660	protein kinase, putative	1.47	2.24	4.31E-03	1.32E-03
261763_at	At1g15520	ABC transporter family involved in resistant to lead. Localizes to plasma membrane	2.18	3.04	4.32E-03	1.27E-04
265073_at	At1g55480	expressed protein	-2.12	-1.42	4.32E-03	3.32E-04
264321_at	At1g04200	expressed protein	1.18	2.07	4.35E-03	9.55E-03
267483_at	At2g02810	UDP-galactose/UDP-glucose transporter	7.55	10.41	4.35E-03	7.43E-04
254250_at	At4g23290	protein kinase family protein	-3.57	-5.24	4.37E-03	5.45E-03
257294_at	At3g15570	phototropic-responsive NPH3 family protein	-3.86	-4.17	4.37E-03	1.64E-04
259033_at	At3g09410	pectinacetylesterase family protein	2.05	1.96	4.37E-03	2.09E-04
259312_at	At3g05200	zinc finger (C3HC4-type RING finger) family protein (ATL6)	2.68	2.98	4.37E-03	1.01E-02
260704_at	At1g32470	glycine cleavage system H protein, mitochondrial, putative	-4.03	-3.62	4.37E-03	8.92E-05
260769_at	At1g49010	myb family transcription factor	-2.05	-2.41	4.37E-03	4.20E-03
248242_at	At5g53580	aldo/keto reductase family protein	-2.26	-1.80	4.38E-03	3.58E-04
266596_at	At2g46150	expressed protein	1.64	2.28	4.43E-03	3.11E-05
249072_at	At5g44060	expressed protein	1.66	2.08	4.44E-03	1.91E-03
250058_at	At5g17870	plastid-specific ribosomal protein-related	-2.44	-1.99	4.44E-03	1.02E-04
260301_at	At1g80290	glycosyltransferase family protein 47	1.99	2.57	4.44E-03	3.81E-04
263864_at	At2g04530	RNase Z	2.15	1.90	4.45E-03	5.67E-08
245301_at	At4g17190	farnesyl pyrophosphate synthetase 2 (FPS2) / FPP synthetase 2 / farnesyl diphosphate synthase 2	-2.28	-2.34	4.47E-03	3.07E-04
246125_at	At5g19875	expressed protein	2.01	2.93	4.48E-03	3.24E-04
253317_at	At4g33960	expressed protein	-2.24	-2.04	4.48E-03	3.12E-03
257260_at	At3g22104	phototropic-responsive NPH3 protein-related	-1.67	-2.07	4.48E-03	3.63E-02
258003_at	At3g29030	expansin, putative (EXP5)	-4.02	-5.92	4.50E-03	2.03E-03
259625_at	At1g42970	glyceraldehyde-3-phosphate dehydrogenase B, chloroplast (GAPB) / NADP-dependent glyceraldehydephosphate dehydrogenase subunit B	-2.21	-1.60	4.50E-03	9.07E-05
254609_at	At4g18970	GDSL-motif lipase/hydrolase family protein	-4.57	-5.43	4.51E-03	1.65E-03
245934_at	At5g09330	no apical meristem (NAM) family protein	2.03	2.12	4.52E-03	3.01E-02
246532_at	At5g15870	glycosyl hydrolase family 81 protein	2.11	3.25	4.52E-03	4.57E-03
248759_at	At5g47610	zinc finger (C3HC4-type RING finger) family protein	-1.98	-3.60	4.52E-03	2.30E-02
257535_at	At3g09490	chloroplast lumen common family protein, 2 TPR domains	2.84	3.57	4.52E-03	2.77E-04
261206_at	At1g12800	S1 RNA-binding domain-containing protein	-2.19	-2.07	4.52E-03	1.70E-03
250968_at	At5g02890	transferase family protein	-5.26	-7.25	4.53E-03	3.76E-04
261167_at	At1g04980	disulfide isomerase-like (PDIL) protein, a member of a multigene family within the thioredoxin (TRX) superfamily.	5.68	7.97	4.55E-03	6.09E-03
248962_at	At5g45680	FK506-binding protein 1 (FKBP13)	-3.40	-3.52	4.56E-03	6.06E-04
261118_at	At1g75460	ATP-dependent protease La (LON) domain-containing protein	-1.83	-2.44	4.56E-03	7.32E-04
251650_at	At3g57360	expressed protein	1.84	2.82	4.57E-03	2.93E-03
258511_at	At3g06590	expressed protein	-1.43	-2.24	4.57E-03	2.43E-02
259251_at	At3g07600	heavy-metal-associated domain-containing protein	2.56	4.79	4.57E-03	2.30E-04
259403_at	At1g17745	D-3-phosphoglycerate dehydrogenase / 3-PGDH	3.42	3.32	4.58E-03	6.99E-05
250821_at	At5g05190	expressed protein	1.68	2.34	4.59E-03	7.63E-03
251689_at	At3g56500	serine-rich protein-related	1.99	2.06	4.61E-03	8.33E-04
252403_at	At3g48080	lipase class 3 family protein / disease resistance protein-related	5.65	5.56	4.62E-03	4.19E-03
254789_at	At4g12880	plastocyanin-like domain-containing protein	-3.72	-2.89	4.63E-03	7.82E-05
249073_at	At5g44020	acid phosphatase class B family protein	-5.52	-8.00	4.65E-03	4.51E-05
248681_at	At5g48900	pectate lyase family protein	-4.69	-4.44	4.67E-03	4.26E-05
249237_at	At5g42050	expressed protein	2.55	3.15	4.68E-03	9.13E-04
257536_at	At3g02800	tyrosine specific protein phosphatase family protein	4.24	4.91	4.69E-03	3.60E-03
261718_at	At1g18390	protein kinase family protein	2.58	2.70	4.69E-03	4.79E-04
245362_at	At4g17460	homeobox-leucine zipper protein 1 (HAT1) / HD-ZIP protein 1	-2.54	-3.79	4.71E-03	2.09E-05
245176_at	At2g47440	DNAJ heat shock N-terminal domain-containing protein	-2.67	-2.35	4.72E-03	1.27E-05
261553_at	At1g63420	expressed protein	-2.02	-1.84	4.72E-03	3.61E-03
262705_at	At1g16260	protein kinase family protein	2.51	1.94	4.74E-03	4.25E-04
259520_at	At1g12320	expressed protein	2.81	3.12	4.75E-03	2.59E-04
260876_at	At1g21460	nodulin MtN3 family protein	-1.66	-2.18	4.75E-03	1.50E-03
254119_at	At4g24780	pectate lyase family protein	-3.86	-5.13	4.76E-03	1.51E-03
267500_s_at	At2g45510 At2g44890	cytochrome P450, putative	2.16	2.02	4.77E-03	2.80E-04
253425_at	At4g32190	centromeric protein-related	-2.04	-2.20	4.78E-03	3.02E-03
263345_s_at	At2g05060 At2g05070 At2g05100	similar to protein kinase family protein	-1.63	-2.98	4.78E-03	2.33E-03
267469_at	At2g30590	WRKY family transcription factor	2.25	1.91	4.78E-03	2.19E-04
247931_at	At5g57040	lactoylglutathione lyase family protein / glyoxalase I family protein	-2.09	-2.18	4.80E-03	2.38E-04
254218_at	At4g23740	leucine-rich repeat transmembrane protein kinase, putative	-2.40	-2.90	4.81E-03	2.29E-04
256233_at	At3g12360	ankyrin repeat family protein	1.82	2.10	4.83E-03	5.42E-03
261413_at	At1g07630	protein phosphatase 2C family protein / PP2C family protein	1.93	2.09	4.86E-03	1.24E-03
266123_at	At2g45180	protease inhibitor/seed storage/lipid transfer protein (LTP) family protein	-1.77	-2.13	4.86E-03	3.62E-05
255032_at	At4g09500	glycosyltransferase family protein	-1.70	-2.09	4.88E-03	8.35E-06
257793_at	At3g26960	expressed protein	-2.62	-2.50	4.89E-03	3.10E-03
260371_at	At1g69690	TCP family transcription factor, putative	-1.95	-2.01	4.91E-03	1.64E-06
254783_at	At4g12830	hydrolase, alpha/beta fold family protein	-3.02	-2.04	4.95E-03	2.22E-04
258554_at	At3g06980	DEAD/DEAH box helicase, putative	-1.94	-2.49	4.95E-03	6.46E-03
259734_at	At1g77500	expressed protein	1.33	2.15	4.95E-03	1.01E-03
263565_at	At2g15390	xyloglucan fucosyltransferase, putative (FUT4)	3.51	3.95	4.96E-03	6.20E-03
246998_at	At5g67370	expressed protein	-2.54	-1.50	5.00E-03	4.26E-05
258901_at	At3g05640	protein phosphatase 2C, putative / PP2C, putative	-3.36	-3.70	5.00E-03	1.44E-02
261585_at	At1g01010	no apical meristem (NAM) family protein	2.21	2.37	5.01E-03	2.59E-03
260005_at	At1g67930 At1g67920	Golgi transport complex protein-related	3.34	4.45	5.04E-03	9.40E-04
246370_at	At1g51920	expressed protein	1.25	2.07	5.06E-03	1.69E-04
259979_at	At1g76600	expressed protein	4.09	2.58	5.06E-03	2.95E-02
245401_at	At4g17670	senescence-associated protein-related	1.50	5.42	5.07E-03	1.72E-03
252317_at	At3g48720	transferase family protein	-2.56	-3.13	5.07E-03	9.89E-05
258787_at	At3g11840	U-box domain-containing protein	3.50	3.56	5.07E-03	4.59E-03
255142_at	At4g08390	L-ascorbate peroxidase, stromal (sAPX)	1.62	2.07	5.08E-03	8.12E-04
248037_at	At5g55930	oligopeptide transporter OPT family protein	2.62	4.48	5.15E-03	3.60E-03
254318_at	At4g22530	embryo-abundant protein-related	3.97	3.92	5.16E-03	1.64E-02
258055_at	At3g16250	ferredoxin-related	-9.90	-7.35	5.16E-03	1.01E-04
264841_at	At1g03740	protein kinase family protein	2.28	2.27	5.16E-03	1.11E-02
249817_at	At5g23820	MD-2-related lipid recognition domain-containing protein / ML domain-containing protein	-4.93	-12.15	5.18E-03	1.21E-04
258202_at	At3g13940	expressed protein	1.81	2.01	5.18E-03	7.58E-04
261346_at	At1g79720	aspartyl protease family protein	-2.06	-3.05	5.18E-03	8.96E-04
245272_at	At4g17250	expressed protein	2.16	2.39	5.19E-03	2.29E-02
251336_at	At3g61190	BON1-associated protein 1 (BAP1)	2.86	8.40	5.19E-03	5.63E-03
245357_at	At4g17560	ribosomal protein L19 family protein	-3.62	-2.62	5.21E-03	4.86E-04
260843_at	At1g29060	expressed protein	1.26	2.08	5.21E-03	4.63E-03
248377_at	At5g51720	expressed protein	-2.93	-2.52	5.22E-03	1.01E-04
252234_at	At3g49780	phytosulfokines 3 (PSK3)	3.34	4.38	5.23E-03	2.06E-02
260225_at	At1g74590	glutathione S-transferase, putative	2.68	9.19	5.23E-03	4.22E-05
247949_at	At5g57220	cytochrome P450, putative	6.68	8.01	5.24E-03	6.34E-03
249059_at	At5g44530	subtilase family protein	-3.17	-3.13	5.24E-03	1.63E-02
260959_at	At1g06050	expressed protein	2.01	2.08	5.24E-03	4.14E-04
251760_at	At3g55605	mitochondrial glycoprotein family protein / MAM33 family protein	1.92	2.40	5.25E-03	1.42E-02
265699_at	At2g03550	expressed protein	-1.93	-2.49	5.27E-03	1.42E-04
256746_at	At3g29320	glucan phosphorylase, putative	-2.02	-1.74	5.32E-03	2.15E-03
249047_at	At5g44410	FAD-binding domain-containing protein	-2.07	-1.83	5.33E-03	2.58E-03
246952_at	At5g04820	ovate family protein	-1.77	-2.05	5.34E-03	3.64E-03
249818_at	At5g23860	tubulin beta-8 chain (TUB8) (TUBB8)	-2.04	-2.65	5.36E-03	5.36E-04
263676_at	At1g09340	expressed protein	-2.82	-2.20	5.37E-03	1.13E-04
251746_at	At3g56060	glucose-methanol-choline (GMC) oxidoreductase family protein	-2.33	-3.72	5.38E-03	4.41E-03
254922_at	At4g11370	zinc finger (C3HC4-type RING finger) family protein	4.25	3.88	5.38E-03	7.60E-03
255742_at	At1g25560	AP2 domain-containing transcription factor, putative	2.93	1.90	5.38E-03	1.40E-02
251282_at	At3g61630	AP2 domain-containing transcription factor, putative	3.00	3.40	5.40E-03	1.98E-03
262682_at	At1g75900	family II extracellular lipase 3 (EXL3)	-2.53	-3.39	5.43E-03	3.93E-04
252711_at	At3g43720	protease inhibitor/seed storage/lipid transfer protein (LTP) family protein	-3.55	-4.65	5.46E-03	1.22E-04
262382_at	At1g72920	disease resistance protein (TIR-NBS class), putative	4.72	7.92	5.48E-03	3.53E-02
248646_at	At5g49100	expressed protein	-2.24	-2.55	5.49E-03	1.33E-02
248961_at	At5g45650	subtilase family protein	-2.37	-2.40	5.49E-03	2.71E-02
254505_at	At4g19985	GCN5-related N-acetyltransferase (GNAT) family protein	-2.52	-2.06	5.51E-03	1.14E-03
254110_at	At4g25260	invertase/pectin methylesterase inhibitor family protein	-2.56	-2.74	5.59E-03	4.10E-03
261676_at	At1g18480	calcineurin-like phosphoesterase family protein	1.42	2.07	5.59E-03	4.21E-03
263133_at	At1g78450	SOUL heme-binding family protein	-2.81	-3.36	5.59E-03	7.38E-05
245501_at	At4g15620	integral membrane family protein	-3.41	-3.82	5.63E-03	2.61E-04
248174_at	At5g54600	50S ribosomal protein L24, chloroplast  (CL24)	-2.12	-2.52	5.65E-03	1.61E-03
265740_at	At2g01150	zinc finger (C3HC4-type RING finger) family protein	-2.44	-2.46	5.65E-03	2.13E-04
259926_at	At1g75090	methyladenine glycosylase family protein	-1.69	-2.20	5.67E-03	1.15E-04
251759_at	At3g55630	dihydrofolate synthetase/folylpolyglutamate synthetase (DHFS/FPGS4)	-3.66	-2.70	5.68E-03	2.34E-04
261570_at	At1g01120	fatty acid elongase 3-ketoacyl-CoA synthase 1 (KCS1)	-5.99	-6.13	5.69E-03	4.39E-04
248853_at	At5g46570	protein kinase family protein	-1.87	-2.07	5.71E-03	9.13E-04
250265_at	At5g12900	expressed protein	-2.19	-2.22	5.71E-03	6.60E-04
266658_at	At2g25735	expressed protein	4.04	4.83	5.71E-03	1.45E-05
254034_at	At4g25960	multidrug resistance P-glycoprotein, putative	-2.18	-2.22	5.72E-03	3.14E-04
266700_at	At2g19740	60S ribosomal protein L31 (RPL31A)	1.57	2.13	5.72E-03	1.85E-04
248829_at	At5g47130	Bax inhibitor-1 family / BI-1 family	1.41	2.32	5.75E-03	3.03E-04
250180_at	At5g14450	GDSL-motif lipase/hydrolase family protein	-1.85	-2.22	5.75E-03	2.31E-04
258989_at	At3g08920	rhodanese-like domain-containing protein	-3.14	-4.00	5.75E-03	1.98E-03
261804_at	At1g30530	UDP-glucoronosyl/UDP-glucosyl transferase family protein	-2.11	-2.08	5.75E-03	2.82E-03
266360_at	At2g32250	far-red impaired responsive protein, putative	1.69	2.10	5.75E-03	7.65E-04
254266_at	At4g23130	receptor-like protein kinase 6 (RLK6)	1.90	2.06	5.76E-03	6.85E-04
256426_at	At1g33420	PHD finger family protein	2.26	2.53	5.76E-03	4.16E-02
266551_at	At2g35260	expressed protein	-1.33	-2.11	5.76E-03	2.06E-04
259072_at	At3g11700	beta-Ig-H3 domain-containing protein / fasciclin domain-containing protein	-3.39	-2.79	5.77E-03	1.72E-04
250856_at	At5g04810	pentatricopeptide (PPR) repeat-containing protein	-2.04	-2.13	5.79E-03	5.16E-04
256583_at	At3g28850	glutaredoxin family protein	1.42	2.09	5.80E-03	3.37E-03
261801_at	At1g30520	acyl-activating enzyme 14 (AAE14)	-2.72	-2.70	5.80E-03	9.52E-04
252625_at	At3g44750	histone deacetylase, putative (HD2A)	2.35	2.32	5.81E-03	7.63E-03
249988_at	At5g18310	expressed protein	1.92	2.94	5.83E-03	2.91E-03
251287_at	At3g61820	aspartyl protease family protein	-2.06	-2.79	5.83E-03	1.27E-04
262970_at	At1g75690	chaperone protein dnaJ-related	-2.95	-3.50	5.84E-03	5.48E-04
245952_at	At5g28500	expressed protein	-2.07	-1.48	5.85E-03	1.61E-03
264954_at	At1g77060	mutase family protein	-2.74	-3.36	5.85E-03	1.00E-03
255817_at	At2g33330	33 kDa secretory protein-related	-3.16	-3.38	5.87E-03	1.81E-03
251855_at	At3g54690	sugar isomerase (SIS) domain-containing protein / CBS domain-containing protein	-2.23	-2.31	5.89E-03	3.19E-04
264920_at	At1g60550	naphthoate synthase, putative / dihydroxynaphthoic acid synthetase, putative / DHNA synthetase, putative	-2.31	-2.28	5.89E-03	3.48E-04
246870_at	At5g26030	ferrochelatase I	2.48	2.72	5.90E-03	1.59E-03
255787_at	At2g33590	cinnamoyl-CoA reductase family	2.15	2.26	5.94E-03	1.90E-03
246847_at	At5g26820	ferroportin-related	-2.31	-1.97	5.97E-03	1.33E-03
247980_at	At5g56860	zinc finger (GATA type) family protein	-2.11	-1.87	5.97E-03	1.58E-03
252684_at	At3g44400	disease resistance protein (TIR-NBS-LRR class), putative	1.77	4.35	5.97E-03	1.16E-03
258207_at	At3g14050	RelA/SpoT protein, putative (RSH2)	2.70	3.01	5.97E-03	1.47E-03
263678_at	At1g04420	aldo/keto reductase family protein	-2.87	-2.97	5.97E-03	1.90E-03
264741_at	At1g62290	aspartyl protease family protein	-1.95	-2.66	5.97E-03	3.16E-02
258046_at	At3g21220	mitogen-activated protein kinase kinase (MAPKK), putative (MKK5)	2.01	2.67	5.98E-03	1.92E-03
262693_at	At1g62780	expressed protein	-3.39	-1.68	5.98E-03	9.17E-05
257950_at	At3g21780	UDP-glucoronosyl/UDP-glucosyl transferase family protein	2.24	3.93	5.99E-03	1.35E-03
266946_at	At2g18890	protein kinase family protein	-2.15	-2.01	5.99E-03	4.28E-03
264315_at	At1g70370	BURP domain-containing protein / polygalacturonase, putative	-3.76	-3.72	6.00E-03	2.06E-03
266575_at	At2g24060	translation initiation factor 3 (IF-3) family protein,	-2.55	-2.10	6.00E-03	9.31E-04
251773_at	At3g55960	NLI interacting factor (NIF) family protein	1.79	2.01	6.02E-03	9.67E-04
247954_at	At5g56870	beta-galactosidase, putative / lactase, putativ	4.11	4.89	6.03E-03	1.61E-02
258250_at	At3g15850	fatty acid desaturase family protein	-2.81	-2.37	6.03E-03	9.25E-04
251713_at	At3g56080	dehydration-responsive protein-related	-2.29	-1.64	6.05E-03	8.10E-03
258368_at	At3g14240	subtilase family protein	-2.71	-3.15	6.05E-03	3.60E-03
257774_at	At3g29250	short-chain dehydrogenase/reductase (SDR) family protein	1.35	2.41	6.07E-03	3.24E-04
249807_at	At5g23870	pectinacetylesterase family protein	-2.35	-2.75	6.09E-03	5.99E-04
251058_at	At5g01790	expressed protein	-3.42	-3.68	6.09E-03	2.24E-03
263120_at	At1g78490	cytochrome P450 family protein	-2.43	-1.98	6.13E-03	1.72E-03
264232_at	At1g67470	protein kinase family protein	1.54	2.16	6.14E-03	1.76E-03
261609_at	At1g49740	expressed protein, similar to MAP3K-like protein kinase GB	-2.22	-1.98	6.15E-03	4.08E-04
259230_at	At3g07780	expressed protein	1.70	2.12	6.16E-03	1.43E-02
266476_at	At2g31090	expressed protein	1.83	2.11	6.17E-03	2.84E-03
267175_s_at	At2g37620 At3g53750	actin 1 (ACT1)	-2.10	-1.67	6.19E-03	9.38E-05
267310_at	At2g34680	similar to leucine-rich repeat family protein	-2.16	-2.39	6.19E-03	1.18E-02
246214_at	At4g36990	heat shock factor protein 4 (HSF4) / heat shock transcription factor 4 (HSTF4)	3.48	5.69	6.20E-03	2.16E-04
246986_at	At5g67280	leucine-rich repeat transmembrane protein kinase, putative	-2.25	-2.47	6.20E-03	3.69E-02
261488_at	At1g14345	expressed protein, contains one transmembrane domain	-3.62	-3.33	6.20E-03	5.15E-04
266984_at	At2g39570	ACT domain-containing protein	-1.94	-2.08	6.20E-03	1.60E-04
252032_at	At3g52150	RNA recognition motif (RRM)-containing protein	-2.82	-2.55	6.23E-03	1.20E-03
253835_at	At4g27820	glycosyl hydrolase family 1 protein	-2.02	-1.83	6.23E-03	3.36E-04
264575_at	At1g05190	ribosomal protein L6 family protein	-2.26	-2.45	6.23E-03	1.20E-03
249069_at	At5g44010	expressed protein	-1.83	-2.04	6.27E-03	7.75E-05
256793_at	At3g22160	VQ motif-containing protein	3.09	3.18	6.27E-03	1.23E-02
262645_at	At1g62750	elongation factor Tu family protein	-2.22	-1.51	6.27E-03	4.81E-04
250255_at	At5g13730	RNA polymerase sigma subunit SigD (sigD) / sigma-like factor (SIG4)	-5.08	-5.00	6.29E-03	8.35E-05
251919_at	At3g53800	armadillo/beta-catenin repeat family protein	-2.37	-3.25	6.29E-03	8.96E-04
245532_at	At4g15110	cytochrome P450 97B3, putative (CYP97B3)	-1.89	-2.03	6.31E-03	5.57E-03
255331_at	At4g04330	expressed protein	-1.70	-2.03	6.31E-03	4.07E-04
249130_at	At5g43100	aspartyl protease family protein	1.81	2.01	6.32E-03	1.14E-03
247826_at	At5g58480	glycosyl hydrolase family 17 protein	-2.10	-1.89	6.34E-03	8.96E-04
248075_at	At5g55740	pentatricopeptide (PPR) repeat-containing protein	-2.69	-2.42	6.34E-03	2.47E-04
250398_at	At5g11000	expressed protein	1.15	3.07	6.34E-03	1.20E-02
257172_at	At3g23700	S1 RNA-binding domain-containing protein	-2.36	-2.69	6.34E-03	7.32E-04
259592_at	At1g27950	lipid transfer protein-related	-4.42	-9.90	6.34E-03	8.86E-04
262930_at	At1g65690	harpin-induced protein-related / HIN1-related / harpin-responsive protein-related	4.05	13.25	6.36E-03	3.14E-04
245304_at	At4g15630	integral membrane family protein	-2.22	-2.86	6.37E-03	4.59E-04
266464_at	At2g47800	glutathione-conjugate transporter (MRP4)	4.86	6.09	6.37E-03	2.84E-02
258982_at	At3g08870	lectin protein kinase, putative	1.67	2.02	6.38E-03	1.69E-03
249115_at	At5g43810	pinhead protein (PINHEAD) / zwille protein (ZWILLE)	-2.35	-1.89	6.45E-03	6.23E-04
256215_at	At1g50900	expressed protein	-2.01	-2.07	6.47E-03	1.67E-03
266735_at	At2g46930	pectinacetylesterase, putative	-1.87	-2.23	6.47E-03	1.43E-03
249940_at	At5g22380	no apical meristem (NAM) family protein	2.58	8.10	6.48E-03	2.21E-04
247347_at	At5g63780	zinc finger (C3HC4-type RING finger) family protein	-4.05	-3.08	6.49E-03	1.78E-04
246288_at	At1g31850	dehydration-responsive protein, putative	-2.00	-1.72	6.51E-03	2.79E-04
248848_at	At5g46520	disease resistance protein (TIR-NBS-LRR class), putative	1.64	3.31	6.52E-03	3.08E-04
245198_at	At1g67700	expressed protein	-1.75	-2.25	6.54E-03	3.15E-04
245612_at	At4g14440	enoyl-CoA hydratase/isomerase family protein	-2.62	-3.85	6.54E-03	1.83E-03
252255_at	At3g49220	pectinesterase family protein	-2.30	-2.02	6.54E-03	3.87E-04
254103_at	At4g25030	expressed protein	1.75	2.04	6.54E-03	2.20E-03
256442_at	At3g10930	expressed protein	3.74	15.21	6.54E-03	2.52E-03
262753_at	At1g16340	2-dehydro-3-deoxyphosphooctonate aldolase, putative / phospho-2-dehydro-3-deoxyoctonate aldolase, putative / 3-deoxy-D-manno-octulosonic acid 8-phosphate synthetase, putative	-2.13	-1.92	6.55E-03	1.59E-04
253493_at	At4g31820	phototropic-responsive NPH3 family protein	-2.85	-2.75	6.56E-03	3.26E-03
258218_at	At3g18000	phosphoethanolamine N-methyltransferase 1 / PEAMT 1 (NMT1)	-1.97	-2.14	6.57E-03	5.06E-03
253096_at	At4g37330	cytochrome P450 family protein	-2.49	-2.13	6.58E-03	1.36E-04
257003_at	At3g14110	tetratricopeptide repeat (TPR)-containing protein	-1.81	-2.13	6.58E-03	9.91E-04
253876_at	At4g27430	COP1-interacting protein 7 (CIP7)	-2.07	-2.01	6.61E-03	2.11E-03
258213_at	At3g17950	expressed protein	-2.02	-2.20	6.67E-03	1.42E-04
267308_at	At2g30200	expressed protein	-1.92	-2.14	6.67E-03	1.63E-03
249727_at	At5g35490	expressed protein (MRU1)	-2.93	-3.09	6.68E-03	2.21E-04
247604_at	At5g60950	phytochelatin synthetase-related	4.18	4.45	6.70E-03	3.53E-03
253165_at	At4g35320	expressed protein	-2.09	-2.08	6.72E-03	1.01E-04
250884_at	At5g03940	signal recognition particle 54 kDa protein, chloroplast / 54 chloroplast protein / SRP54 (FFC)	-2.52	-2.31	6.75E-03	5.14E-03
251330_at	At3g61550	zinc finger (C3HC4-type RING finger) family protein	-1.78	-2.55	6.75E-03	2.57E-03
262969_at	At1g75710	zinc finger (C2H2 type) family protein	-1.95	-2.21	6.75E-03	2.15E-04
266555_at	At2g46270	G-box binding factor 3 (GBF3)	1.81	2.12	6.75E-03	2.53E-02
258857_at	At3g02110	serine carboxypeptidase S10 family protein	-2.80	-2.96	6.77E-03	2.05E-04
252165_at	At3g50550	expressed protein,  isoform contains a non-consensus AT donor site at intron 1	2.39	2.35	6.79E-03	8.86E-03
263497_at	At2g42540	cold-responsive protein / cold-regulated protein (cor15a)	-5.49	-10.33	6.79E-03	1.87E-04
264179_at	At1g02180	ferredoxin-related	-2.03	-1.77	6.85E-03	3.08E-03
246784_at	At5g27430	signal peptidase subunit family protein	1.49	2.00	6.86E-03	1.04E-03
257621_at	At3g20410	calmodulin-domain protein kinase isoform 9 (CPK9)	2.16	2.60	6.87E-03	2.81E-02
263668_at	At1g04350	2-oxoglutarate-dependent dioxygenase, putative	-2.34	-2.06	6.87E-03	3.41E-03
245730_at	At1g73470	expressed protein	-1.90	-2.48	6.90E-03	1.62E-02
259788_at	At1g29670	GDSL-motif lipase/hydrolase family protein	-4.29	-5.62	6.90E-03	2.23E-04
253075_at	At4g36150	disease resistance protein (TIR-NBS-LRR class), putative	2.04	2.45	6.92E-03	2.34E-03
253780_at	At4g28400	protein phosphatase 2C, putative / PP2C	1.97	2.51	6.93E-03	1.51E-02
248798_at	At5g47190	ribosomal protein L19 family protein	-2.49	-2.38	6.95E-03	9.09E-04
254921_at	At4g11300	expressed protein	2.15	2.18	6.97E-03	1.06E-02
248062_at	At5g55450	protease inhibitor/seed storage/lipid transfer protein (LTP) family protein	7.48	10.01	6.98E-03	2.42E-06
254122_at	At4g24510	eceriferum protein (CER2)	-2.50	-3.51	6.98E-03	2.61E-04
255698_at	At4g00150	scarecrow-like transcription factor 6 (SCL6)	-1.56	-2.16	6.98E-03	1.33E-02
251786_at	At3g55270	MAP kinase phosphatase (MKP1)	1.36	2.13	7.04E-03	1.87E-03
259981_at	At1g76450	oxygen-evolving complex-related, contains a PsbP domain	-2.36	-2.08	7.05E-03	7.48E-04
257213_at	At3g15020	malate dehydrogenase (NAD), mitochondrial, putative	-2.20	-1.89	7.06E-03	4.69E-03
257516_at	At1g69040	ACT domain containing protein (ACR4)	-1.98	-2.40	7.06E-03	2.76E-03
258468_at	At3g06070	expressed protein	3.36	2.48	7.06E-03	1.44E-03
261470_at	At1g28370	subfamily B-1 of ERF/AP2 transcription factor family	4.44	5.62	7.06E-03	6.80E-03
267592_at	At2g39710	aspartyl protease family protein	1.33	2.16	7.06E-03	2.15E-04
247261_at	At5g64460	expressed protein	-2.63	-2.45	7.07E-03	9.79E-04
254487_at	At4g20780	calcium-binding protein, putative	2.11	2.64	7.08E-03	1.86E-02
256627_at	At3g19970	expressed protein	1.42	2.92	7.08E-03	3.60E-04
263184_at	At1g05560	UDP-glucose transferase (UGT75B2)	1.04	-2.58	7.08E-03	1.55E-04
265354_at	At2g16700	actin-depolymerizing factor 5 (ADF5)	2.08	2.61	7.08E-03	3.89E-02
256177_at	At1g51620	protein kinase family protein	1.28	2.03	7.11E-03	9.14E-04
260898_at	At1g29070	ribosomal protein L34 family protein	-2.28	-2.67	7.11E-03	1.96E-03
267256_s_at	At2g23000 At2g23010	serine carboxypeptidase S10 family protein	-3.48	-3.46	7.11E-03	3.89E-04
245247_at	At4g17230	scarecrow-like transcription factor 13 (SCL13)	2.68	2.82	7.13E-03	1.51E-02
246427_at	At5g17400	ADP, ATP carrier protein, mitochondrial, putative / ADP/ATP translocase, putative / adenine nucleotide translocator, putative	-2.12	-2.30	7.13E-03	2.26E-03
260347_at	At1g69420	zinc finger (DHHC type) family protein	-2.69	-3.25	7.13E-03	3.27E-03
262548_at	At1g31280	PAZ domain-containing protein / piwi domain-containing protein	2.24	1.69	7.13E-03	1.83E-02
255617_at	At4g01330	protein kinase family protein	-2.82	-2.65	7.14E-03	3.08E-04
248402_at	At5g52100	dihydrodipicolinate reductase family protein	-3.11	-3.52	7.16E-03	2.14E-04
251373_at	At3g60530	zinc finger (GATA type) family protein	-1.31	-2.05	7.17E-03	8.72E-05
250752_at	At5g05690	cytochrome P450 90A1 (CYP90A1) (CYP90) (CPD)	-1.38	-2.18	7.18E-03	5.87E-04
255506_at	At4g02130	glycosyl transferase family 8 protein	-2.42	-2.38	7.20E-03	7.66E-04
260567_at	At2g43820	UDP-glucoronosyl/UDP-glucosyl transferase family protein	2.31	1.04	7.20E-03	2.68E-05
255842_at	At2g33530	serine carboxypeptidase S10 family protein	2.72	2.66	7.21E-03	8.03E-04
249096_at	At5g43910	pfkB-type carbohydrate kinase family protein	2.50	3.90	7.22E-03	2.20E-03
256169_at	At1g51800	leucine-rich repeat protein kinase, putative	2.13	2.23	7.25E-03	1.81E-03
263490_at	At2g42620	F-box family protein (ORE9), E3 ubiquitin ligase SCF complex F-box subunit	-1.25	-2.04	7.27E-03	1.50E-02
245821_at	At1g26270	phosphatidylinositol 3- and 4-kinase family protein	2.11	1.89	7.28E-03	8.00E-03
259707_at	At1g77490	L-ascorbate peroxidase, thylakoid-bound (tAPX)	-2.40	-4.08	7.28E-03	2.06E-03
250563_at	At5g08050	expressed protein	-3.76	-4.26	7.29E-03	6.05E-04
254105_at	At4g25080	magnesium-protoporphyrin O-methyltransferase, putative / magnesium-protoporphyrin IX methyltransferase, putative	-2.41	-2.96	7.32E-03	1.12E-03
262571_at	At1g15430	expressed protein	1.75	2.02	7.32E-03	8.71E-04
263674_at	At2g04790	expressed protein	-2.90	-1.77	7.33E-03	1.89E-04
267262_at	At2g22990	sinapoylglucose:malate sinapoyltransferase (SNG1)	-3.51	-3.80	7.34E-03	5.96E-04
253209_at	At4g34830	pentatricopeptide (PPR) repeat-containing protein	-2.04	-1.89	7.41E-03	6.34E-03
254759_at	At4g13180	short-chain dehydrogenase/reductase (SDR) family protein	2.92	2.12	7.41E-03	1.20E-01
255433_at	At4g03210	xyloglucan:xyloglucosyl transferase, putative / xyloglucan endotransglycosylase, putative / endo-xyloglucan transferase, putative	-4.00	-4.44	7.44E-03	2.49E-05
252315_at	At3g48690	expressed protein	-2.50	-1.46	7.45E-03	7.81E-05
258941_at	At3g09940	monodehydroascorbate reductase, putative	3.11	4.69	7.45E-03	3.65E-04
256855_at	At3g15190	chloroplast 30S ribosomal protein S20, putative	-2.42	-2.67	7.47E-03	1.82E-03
256100_at	At1g13750	calcineurin-like phosphoesterase family protein	2.43	2.15	7.54E-03	7.53E-04
257831_at	At3g26710	expressed protein	-2.03	-1.74	7.54E-03	8.31E-04
258979_at	At3g09440	heat shock cognate 70 kDa protein 3 (HSC70-3)	3.32	1.65	7.54E-03	1.44E-04
264561_at	At1g55810	uracil phosphoribosyltransferase, putative / UMP pyrophosphorylase, putative / UPRTase, putative	-2.08	-2.48	7.54E-03	1.56E-03
256469_at	At1g32540	zinc finger protein, putative	-2.94	-2.87	7.56E-03	2.10E-03
266752_at	At2g47000	multidrug resistant (MDR) ABC transporter, putative	2.17	3.49	7.60E-03	1.05E-02
259671_at	At1g52290	protein kinase family protein	2.24	2.26	7.62E-03	1.07E-03
262038_at	At1g35580	beta-fructofuranosidase, putative / invertase, putative / saccharase, putative / beta-fructosidase, putative	2.17	2.24	7.63E-03	3.21E-04
261422_at	At1g18730	expressed protein	-3.05	-2.72	7.67E-03	2.88E-04
246238_at	At4g36670	mannitol transporter, putative	3.65	2.69	7.68E-03	1.90E-03
246631_at	At1g50740	expressed protein	2.23	2.00	7.68E-03	2.71E-03
266799_at	At2g22860	phytosulfokines 2 (PSK2)	1.96	3.40	7.68E-03	5.44E-04
247943_at	At5g57170	macrophage migration inhibitory factor family protein / MIF family protein	-2.35	-1.89	7.71E-03	3.10E-04
254370_at	At4g21750	L1 specific homeobox gene (ML1) / ovule-specific homeobox protein A20	-1.54	-2.02	7.71E-03	2.28E-05
245852_at	At5g13510	ribosomal protein L10 family protein	-1.90	-2.04	7.72E-03	5.03E-03
267289_at	At2g23770	protein kinase family protein / peptidoglycan-binding LysM domain-containing protein	2.42	2.89	7.72E-03	7.80E-03
260453_s_at	At1g72510 At2g09970	expressed protein	-2.49	-1.74	7.75E-03	3.08E-04
251784_at	At3g55330	photosystem II reaction center PsbP family protein	-2.82	-2.46	7.78E-03	5.98E-04
262291_at	At1g70790	C2 domain-containing protein	-1.92	-2.06	7.78E-03	7.57E-03
265895_at	At2g15000	expressed protein	2.00	2.14	7.78E-03	1.24E-03
266636_at	At2g35370	glycine cleavage system H protein 1, mitochondrial (GDCSH) (GCDH)	-2.19	-1.83	7.78E-03	2.02E-04
247708_at	At5g59550	zinc finger (C3HC4-type RING finger) family protein	2.34	2.83	7.79E-03	3.84E-02
260279_at	At1g80420	DNA repair protein, putative (XRCC1)	2.07	1.84	7.81E-03	2.14E-02
253626_at	At4g30640	F-box family protein (FBL19)	1.96	2.62	7.88E-03	9.09E-04
259080_at	At3g04910	protein kinase family protein	-1.83	-2.37	7.89E-03	5.80E-04
249894_at	At5g22580	expressed protein	-2.10	-2.94	7.93E-03	2.08E-03
261032_at	At1g17430	hydrolase, alpha/beta fold family protein	1.82	2.07	7.95E-03	4.45E-03
245771_at	At1g30250	expressed protein	-1.30	-2.05	7.98E-03	3.43E-02
258919_at	At3g10525	expressed protein	-3.38	-2.39	7.99E-03	4.50E-04
266873_at	At2g44740	cyclin family protein	-3.94	-4.20	8.02E-03	1.27E-03
259902_at	At1g74170	leucine-rich repeat family protein	1.98	2.83	8.03E-03	2.24E-03
247186_at	At5g65470	expressed protein	-1.98	-2.17	8.04E-03	2.82E-04
257805_at	At3g18830	plasma membrane-localized polyol/cyclitol/monosaccharide-H+-symporter	1.89	2.22	8.04E-03	6.43E-07
258593_at	At3g04480	endoribonuclease L-PSP family protein	2.03	1.89	8.04E-03	3.80E-04
263477_at	At2g31790	UDP-glucoronosyl/UDP-glucosyl transferase family protein	-2.09	-2.13	8.04E-03	1.82E-03
265768_at	At2g48020	sugar transporter, putative	-1.29	-2.04	8.04E-03	9.89E-05
265837_at	At2g14560	expressed protein	3.14	3.10	8.04E-03	1.44E-02
262175_at	At1g74880	subunit NDH-O of NAD(P)H:plastoquinone dehydrogenase complex (Ndh complex) present in the thylakoid membrane of chloroplasts	-3.02	-2.31	8.06E-03	2.46E-04
248969_at	At5g45310	expressed protein	-2.21	-2.99	8.08E-03	1.38E-04
250109_at	At5g15230	gibberellin-regulated protein 4 (GASA4) / gibberellin-responsive protein 4	-4.35	-6.67	8.08E-03	9.58E-04
250655_at	At5g06960	bZIP family transcription factor (OBF5)	1.63	2.21	8.08E-03	9.58E-04
260837_at	At1g43670	fructose-1,6-bisphosphatase, putative / D-fructose-1,6-bisphosphate 1-phosphohydrolase, putative / FBPase, putative	-2.09	-1.66	8.08E-03	3.84E-04
AFFX-r2-At-U12639_at	GUS	8.08	44.78	8.08E-03	9.17E-05
257139_at	At3g28890	leucine-rich repeat family protein	1.85	2.31	8.10E-03	1.46E-04
266899_at	At2g34620	mitochondrial transcription termination factor-related / mTERF-related	-3.83	-4.46	8.10E-03	2.34E-03
266996_at	At2g34490	cytochrome P450 family protein	-3.13	-2.74	8.17E-03	2.34E-03
267635_at	At2g42220	rhodanese-like domain-containing protein	-3.03	-5.08	8.17E-03	9.69E-04
248332_at	At5g52640	heat shock protein 81-1 (HSP81-1) / heat shock protein 83 (HSP83)	5.13	2.85	8.18E-03	4.47E-04
259860_at	At1g80640	protein kinase family protein	-1.92	-2.63	8.18E-03	2.33E-03
250408_at	At5g10930	CBL-interacting protein kinase 5 (CIPK5)	-2.91	-4.03	8.24E-03	4.45E-03
258038_at	At3g21260	glycolipid transfer protein-related	-2.09	-2.87	8.26E-03	1.20E-03
266215_at	At2g06850	xyloglucan:xyloglucosyl transferase / xyloglucan endotransglycosylase / endo-xyloglucan transferase (EXT) (EXGT-A1)	-10.66	-13.59	8.26E-03	1.86E-04
257264_at	At3g22060	contains Pfam profile: PF01657 Domain of unknown function that is usually associated with protein kinase domain	2.08	2.25	8.28E-03	2.71E-02
258894_at	At3g05650	disease resistance family protein	1.73	2.34	8.31E-03	5.22E-03
261954_at	At1g64510	ribosomal protein S6 family protein	-2.86	-2.94	8.33E-03	1.39E-03
256792_at	At3g22150	pentatricopeptide (PPR) repeat-containing protein	-3.11	-2.72	8.34E-03	3.24E-04
245524_at	At4g15920	nodulin MtN3 family protein	-2.74	-3.25	8.37E-03	2.53E-03
266135_at	At2g45100	transcription factor IIB (TFIIB) family protein	-1.49	-2.02	8.37E-03	2.13E-04
245334_at	At4g15800	rapid alkalinization factor (RALF) family protein	-2.70	-1.42	8.38E-03	2.86E-05
251625_at	At3g57260	glycosyl hydrolase family 17 protein	6.52	19.16	8.38E-03	1.72E-06
253188_at	At4g35300	transporter-related	-2.19	-1.85	8.39E-03	9.13E-04
260991_at	At1g12160	flavin-containing monooxygenase family protein / FMO family protein	1.90	2.18	8.39E-03	2.46E-04
261190_at	At1g32990	ribosomal protein L11 family protein	-2.39	-2.63	8.39E-03	1.19E-03
265287_at	At2g20260	photosystem I reaction center subunit IV, chloroplast, putative / PSI-E, putative (PSAE2	-1.30	-2.15	8.40E-03	3.63E-04
248509_at	At5g50335	expressed protein	-2.16	-2.42	8.41E-03	3.58E-03
249750_at	At5g24570	expressed protein	-1.71	-2.85	8.44E-03	4.11E-04
250045_at	At5g17700	MATE efflux family protein	-2.46	-2.90	8.44E-03	1.04E-03
252023_at	At3g52920	expressed protein	-2.13	-2.18	8.45E-03	7.50E-04
261492_at	At1g14290	acid phosphatase, putative	-2.85	-3.15	8.48E-03	4.11E-04
261198_at	At1g12940	high-affinity nitrate transporter, putative	5.60	5.59	8.50E-03	1.39E-04
247443_at	At5g62720	integral membrane HPP family protein	-2.55	-3.73	8.52E-03	2.76E-03
265444_s_at	At2g37180 At2g37170	plasma membrane intrinsic protein 2C (PIP2C) / aquaporin PIP2.3 (PIP2.3) / water-stress induced tonoplast intrinsic protein (RD28)	-3.55	-2.54	8.52E-03	1.12E-02
266395_at	At2g43100	aconitase C-terminal domain-containing protein	-2.77	-2.72	8.52E-03	4.51E-04
266911_at	At2g45910	protein kinase family protein / U-box domain-containing protein	1.61	2.03	8.52E-03	3.20E-03
254291_at	At4g23010	UDP-galactose transporter-related	1.78	2.06	8.54E-03	7.98E-04
267549_at	At2g32640	expressed protein	-2.28	-2.21	8.54E-03	5.62E-04
256598_at	At3g30180	cytochrome p450 enzyme that catalyzes the last reaction in the production of brassinolide	-3.07	-5.32	8.58E-03	2.49E-03
245845_at	At1g26150	kinase family protein	-2.34	-2.24	8.62E-03	3.95E-03
248427_at	At5g51750	subtilase family protein	-3.01	-3.55	8.62E-03	6.50E-04
245076_at	At2g23170	IAA-amido synthase that conjugates Asp and other amino acids to auxin in vitro.	1.46	2.11	8.65E-03	4.71E-04
253283_at	At4g34090	expressed protein	-2.98	-1.98	8.68E-03	3.28E-04
258386_at	At3g15520	peptidyl-prolyl cis-trans isomerase TLP38, chloroplast / thylakoid lumen PPIase of 38 kDa / cyclophilin / rotamase, cyclophylin-type	-2.70	-5.05	8.69E-03	7.26E-03
246548_at	At5g14910	heavy-metal-associated domain-containing protein	-2.24	-2.06	8.70E-03	6.98E-04
250892_at	At5g03760	glycosyl transferase family 2 protein	-3.89	-3.29	8.71E-03	1.48E-04
253040_at	At4g37800	xyloglucan:xyloglucosyl transferase, putative / xyloglucan endotransglycosylase, putative / endo-xyloglucan transferase, putative	-8.55	-11.71	8.71E-03	3.06E-04
263114_at	At1g03130	photosystem I reaction center subunit II, chloroplast, putative / photosystem I 20 kDa subunit, putative / PSI-D, putative (PSAD2)	-1.30	-2.23	8.71E-03	6.20E-03
264397_at	At1g11820	glycosyl hydrolase family 17 protein	-1.86	-2.18	8.73E-03	8.85E-03
252548_at	At3g45850	kinesin motor protein-related, kinesin-related protein TKRP125	-2.44	-3.06	8.76E-03	7.23E-03
261519_at	At1g71810	ABC1 family protein	-2.07	-1.92	8.79E-03	4.24E-03
263083_at	At2g27190	iron(III)-zinc(II) purple acid phosphatase (PAP12)	-2.20	-1.75	8.79E-03	1.30E-02
250400_at	At5g10740	protein phosphatase 2C-related / PP2C-related, protein phosphatase 2C	2.21	2.15	8.87E-03	4.75E-03
263942_at	At2g35860	beta-Ig-H3 domain-containing protein / fasciclin domain-containing protein	-2.70	-2.26	8.87E-03	8.16E-04
252133_at	At3g50900	expressed protein	2.38	3.14	8.92E-03	7.12E-03
260082_at	At1g78180	mitochondrial substrate carrier family protein	-1.90	-2.03	8.94E-03	2.10E-03
253453_at	At4g31860	protein phosphatase 2C, putative / PP2C, putative	2.09	1.86	8.99E-03	4.71E-03
266072_at	At2g18700	glycosyl transferase family 20 protein / trehalose-phosphatase family protein	2.12	2.74	8.99E-03	1.89E-02
257061_at	At3g18250	expressed protein	3.03	7.13	9.01E-03	3.28E-04
250819_at	At5g05100	expressed protein	2.06	1.82	9.02E-03	3.19E-02
249917_at	At5g22460	esterase/lipase/thioesterase family protein+C1023:C1070	-1.87	-2.09	9.03E-03	3.43E-03
257168_at	At3g24430	expressed protein	-2.16	-2.04	9.06E-03	6.47E-03
261388_at	At1g05385	photosystem II 11 kDa protein-related	-2.12	-2.16	9.10E-03	2.69E-03
253971_at	At4g26530	fructose-bisphosphate aldolase, putative	-5.92	-6.10	9.12E-03	3.84E-04
246841_at	At5g26700	germin-like protein, putative	2.96	2.04	9.13E-03	5.01E-04
262728_at	At1g75820	CLAVATA1 receptor kinase (CLV1)	-1.89	-2.24	9.13E-03	3.92E-02
263183_at	At1g05570	similar to glycosyl transferase family 48 protein	2.45	2.73	9.13E-03	4.88E-04
250503_at	At5g09820	plastid-lipid associated protein PAP / fibrillin family protein	-2.08	-2.58	9.22E-03	3.35E-04
254926_at	At4g11280	1-aminocyclopropane-1-carboxylate synthase 6 /  ACC synthase 6  (ACS6)	4.64	4.59	9.22E-03	1.44E-02
264458_at	At1g10410	expressed protein	1.54	2.36	9.22E-03	3.97E-04
266035_at	At2g05990	enoyl-(acyl-carrier protein) reductase (NADH), chloroplast, putative / NADH-dependent enoyl-ACP reductase, putative	-2.56	-2.90	9.26E-03	3.41E-03
247065_s_at	At5g66910 At5g66900	disease resistance protein (CC-NBS-LRR class), putative	2.01	2.69	9.27E-03	4.23E-03
251155_at	At3g63160	expressed protein	-3.23	-4.00	9.28E-03	1.59E-03
254427_at	At4g21190	pentatricopeptide (PPR) repeat-containing protein	-2.41	-2.26	9.30E-03	3.95E-04
264990_at	At1g27210	expressed protein	-2.37	-2.09	9.31E-03	6.69E-04
264963_at	At1g60600	1,4-dihydroxy-2-naphthoic acid phytyltransferase involved in phylloquinone and plastoquinone biosynthesis	-3.39	-2.81	9.34E-03	1.09E-03
266295_at	At2g29550	tubulin beta-7 chain (TUB7)	-2.21	-2.56	9.39E-03	4.10E-03
266790_at	At2g28950	expansin, putative (EXP6)	-3.61	-3.73	9.39E-03	1.82E-03
257024_at	At3g19100	calcium-dependent protein kinase, putative / CDPK, putative	-1.95	-2.22	9.44E-03	1.28E-03
261836_at	At1g16090	wall-associated kinase-related	1.87	3.20	9.44E-03	4.59E-04
258682_at	At3g08720	serine/threonine protein kinase (PK19)	2.31	3.32	9.48E-03	8.60E-03
250936_at	At5g03120	expressed protein	-3.32	-4.33	9.62E-03	1.39E-04
262947_at	At1g75750	gibberellin-regulated protein 1 (GASA1) / gibberellin-responsive protein 1	-2.35	-2.62	9.66E-03	2.63E-02
250190_at	At5g14320	30S ribosomal protein S13, chloroplast (CS13), ribosomal protein S13 precursor	-2.02	-2.25	9.69E-03	5.49E-04
248337_at	At5g52310	low-temperature-responsive protein 78 (LTI78) / desiccation-responsive protein 29A (RD29A)	-2.03	-2.08	9.71E-03	1.23E-03
261913_at	At1g65860	flavin-containing monooxygenase family protein / FMO family protein	-3.39	-3.57	9.71E-03	1.85E-02
254638_at	At4g18740	expressed protein	-2.15	-2.42	9.75E-03	3.08E-04
256576_at	At3g28210	zinc finger (AN1-like) family protein	1.64	2.91	9.75E-03	5.64E-04
253617_at	At4g30410	expressed protein	-1.94	-2.44	9.77E-03	2.38E-03
263150_at	At1g54050	17.4 kDa class III heat shock protein (HSP17.4-CIII)	-2.02	-3.01	9.78E-03	1.50E-03
264201_at	At1g22630	expressed protein	-2.17	-1.38	9.80E-03	3.81E-03
253943_at	At4g27030 At4g27040	expressed protein	-2.85	-2.38	9.92E-03	6.97E-04
253421_at	At4g32340	expressed protein	-1.63	-2.60	9.93E-03	7.04E-04
245117_at	At2g41560	calcium-transporting ATPase 4, plasma membrane-type / Ca2+-ATPase, isoform 4 (ACA4)	-1.97	-2.08	9.97E-03	5.23E-03
252001_at	At3g52750	chloroplast division protein, putative	-1.97	-2.26	9.97E-03	3.34E-03
254409_at	At4g21400	protein kinase family protein	1.52	2.75	9.97E-03	1.10E-03
247848_at	At5g58120	disease resistance protein (TIR-NBS-LRR class), putative	1.84	4.03	9.98E-03	1.67E-03
245854_at	At5g13490	ADP, ATP carrier protein 2, mitochondrial / ADP/ATP translocase 2 / adenine nucleotide translocator 2 (ANT2)	1.79	2.11	1.00E-02	1.86E-05
250317_at	At5g12250	tubulin beta-6 chain (TUB6)	-1.87	-2.04	1.00E-02	4.75E-04
253090_at	At4g36360	beta-galactosidase, putative / lactase, putative	-2.77	-2.66	1.00E-02	2.00E-04
260002_at	At1g67940	ABC transporter family protein	1.61	2.03	1.00E-02	1.25E-02
260441_at	At1g68260	thioesterase family protein	-1.49	-2.08	1.00E-02	4.17E-03
253947_at	At4g26760	microtubule associated protein (MAP65/ASE1) family protein	-2.01	-2.04	1.01E-02	4.17E-03
257999_at	At3g27540	glycosyl transferase family 17 protein	-2.69	-2.49	1.01E-02	6.49E-03
264511_at	At1g09350	galactinol synthase, putative	-2.04	-2.34	1.01E-02	2.79E-06
265118_at	At1g62660	beta-fructosidase (BFRUCT3) / beta-fructofuranosidase / invertase, vacuolar	-2.50	-2.63	1.01E-02	4.80E-04
267158_at	At2g37640	expansin, putative (EXP3)	-3.68	-3.98	1.01E-02	1.14E-02
249770_at	At5g24110	WRKY family transcription factor	1.20	2.85	1.02E-02	3.76E-04
253629_at	At4g30450	glycine-rich protein	-1.47	-2.02	1.02E-02	1.07E-06
256245_at	At3g12580	heat shock protein 70, putative / HSP70, putative	3.08	1.39	1.02E-02	1.11E-03
261191_at	At1g32900	starch synthase, putative	-1.33	2.31	1.02E-02	1.14E-02
265356_at	At2g16595	putative SSR alpha subunit  contains InterPro domain Translocon-associated protein (TRAP), alpha subunit	2.62	2.50	1.02E-02	1.74E-03
252975_s_at	At4g38430	member of KPP-like gene family, homolog of KPP (kinase partner protein) gene in tomato	-2.25	-2.58	1.03E-02	8.34E-04
254244_at	At4g23230	protein kinase	2.03	2.49	1.03E-02	2.12E-03
256170_at	At1g51790	leucine-rich repeat protein kinase, putative	2.04	2.44	1.03E-02	2.67E-03
247266_at	At5g64570	glycosyl hydrolase family 3 protein	-2.81	-2.33	1.04E-02	2.10E-04
248975_at	At5g45040	cytochrome c6 (ATC6)	-1.99	-2.04	1.04E-02	7.10E-04
254623_at	At4g18480	magnesium-chelatase subunit chlI, chloroplast / Mg-protoporphyrin IX chelatase (CHLI) (CS) (CH42)	-2.26	-2.08	1.04E-02	4.51E-03
260667_at	At1g19440	very-long-chain fatty acid condensing enzyme, putative	-2.29	-2.17	1.04E-02	5.80E-03
248562_at	At5g49680	cell expansion protein, putative	2.18	1.69	1.05E-02	7.10E-04
252014_at	At3g52870	calmodulin-binding family protein	-2.33	-2.65	1.05E-02	1.38E-02
259320_at	At3g01080	WRKY family transcription factor	2.74	2.73	1.05E-02	3.97E-02
260745_at	At1g78370	glutathione S-transferase, putative	-2.99	-2.83	1.05E-02	6.50E-04
250004_at	At5g18750	DNAJ heat shock N-terminal domain-containing protein	1.89	2.20	1.06E-02	1.71E-02
256383_at	At1g66820	glycine-rich protein	-2.49	-1.52	1.06E-02	2.90E-03
265247_at	At2g43030	ribosomal protein L3 family protein	-2.28	-2.70	1.06E-02	1.52E-03
266247_at	At2g27660	DC1 domain-containing protein	1.50	2.98	1.06E-02	3.06E-04
267036_at	At2g38465	expressed protein	-2.11	-2.28	1.06E-02	1.12E-03
247487_at	At5g62150	peptidoglycan-binding LysM domain-containing protein	1.73	2.49	1.07E-02	2.70E-04
248908_at	At5g45800	leucine-rich repeat transmembrane protein kinase, putative	1.16	2.45	1.07E-02	2.82E-04
254241_at	At4g23190	protein kinase family protein	1.70	2.45	1.07E-02	5.42E-03
262932_at	At1g65820	microsomal glutathione s-transferase, putative	1.77	2.15	1.07E-02	6.45E-03
245112_at	At2g41540	NAD-dependent glycerol-3-phosphate dehydrogenase family protein	-2.63	-3.58	1.08E-02	1.98E-03
249423_at	At5g39785	expressed protein	1.68	2.85	1.08E-02	1.04E-03
251640_at	At3g57450	expressed protein	3.55	3.16	1.08E-02	5.72E-03
258244_at	At3g27770	expressed protein	-1.92	-2.18	1.08E-02	7.28E-04
258322_at	At3g22740	homocysteine S-methyltransferase 3 (HMT-3)	-1.98	-2.23	1.08E-02	9.43E-03
259163_at	At3g01490	protein kinase, putative	-2.42	-3.13	1.08E-02	6.01E-03
259424_at	At1g13830	beta-1,3-glucanase-related	1.64	2.48	1.08E-02	3.29E-04
260549_at	At2g43535	defensin-like (DEFL) family protein.	-2.62	-3.95	1.08E-02	2.44E-04
260902_at	At1g21440	mutase family protein	-2.60	-2.31	1.08E-02	9.79E-04
264078_at	At2g28470	beta-galactosidase, putative / lactase, putative	-4.41	-4.07	1.08E-02	7.56E-04
256796_at	At3g22210	expressed protein	-2.81	-2.31	1.09E-02	2.45E-04
261016_at	At1g26560	glycosyl hydrolase family 1 protein	-3.11	-3.65	1.09E-02	1.46E-03
263174_at	At1g54040	kelch repeat-containing protein	-2.04	-2.77	1.09E-02	2.31E-03
251479_at	At3g59700	lectin protein kinase, putative	1.48	2.41	1.10E-02	2.83E-03
254063_at	At4g25390	protein kinase family protein	1.73	2.46	1.10E-02	2.95E-03
257932_at	At3g17040	tetratricopeptide repeat (TPR)-containing protein	-1.79	-2.05	1.10E-02	1.96E-02
265709_at	At2g03540	expressed protein,   expression supported by MPSS	1.98	2.90	1.10E-02	7.94E-03
245291_at	At4g16155	dihydrolipoamide dehydrogenase 2, plastidic / lipoamide dehydrogenase 2 (PTLPD2)	-1.89	-2.70	1.11E-02	1.17E-05
247419_at	At5g63080	transcription factor jumonji (jmjC) domain-containing protein	2.10	1.96	1.11E-02	2.39E-03
248270_at	At5g53450	protein kinase family protein	-1.89	-2.90	1.11E-02	4.35E-05
252387_at	At3g47800 At3g47810	aldose 1-epimerase family protein	2.16	2.47	1.11E-02	9.87E-01
263287_at	At2g36145	expressed protein	-3.53	-2.79	1.11E-02	1.39E-04
245193_at	At1g67810	Fe-S metabolism associated domain-containing protein	5.16	4.19	1.12E-02	6.18E-05
254085_at	At4g24960	ABA-responsive protein (HVA22d)	-2.51	-2.04	1.12E-02	2.51E-03
255622_at	At4g01070	the glycosyltransferase (UGT72B1) is involved in metabolizing xenobiotica (chloroaniline and chlorophenole)	-1.42	-2.17	1.12E-02	8.67E-03
262569_at	At1g15180	MATE efflux family protein	-2.50	-3.23	1.12E-02	6.43E-03
247811_at	At5g58430	exocyst subunit EXO70 family protein, leucine zipper-containing protei	1.84	2.14	1.13E-02	7.45E-03
253218_at	At4g34980	subtilase family protein	-2.01	-1.65	1.13E-02	3.77E-02
261248_at	At1g20030	pathogenesis-related thaumatin family protein	-2.75	-3.34	1.13E-02	2.27E-03
248775_at	At5g47850	protein kinase, putative	1.41	3.57	1.14E-02	1.27E-04
255417_at	At4g03190 At4g03180	F-box family protein (FBL18)	-2.02	-2.03	1.14E-02	1.13E-02
245084_at	At2g23290	myb family transcription factor	1.79	2.11	1.15E-02	3.79E-03
258239_at	At3g27690	chlorophyll A-B binding protein (LHCB2:4)	-5.95	-14.29	1.15E-02	3.28E-03
252915_at	At4g38810	calcium-binding EF hand family protein	-2.04	-1.75	1.16E-02	3.76E-04
256468_at	At1g32550	ferredoxin family protein	-2.08	-1.82	1.16E-02	5.49E-04
264400_at	At1g61800	glucose-6-phosphate/phosphate translocator, putative	2.12	3.35	1.16E-02	8.12E-04
265715_s_at	At1g13860 At2g03480	dehydration-responsive protein-related	-1.86	-2.19	1.16E-02	1.11E-02
266335_at	At2g32440	ent-kaurenoic acid hydroxylase, putative / cytochrome P450, putative	-1.66	-2.07	1.16E-02	8.86E-03
248934_at	At5g46080	protein kinase family protein	1.65	2.91	1.17E-02	2.56E-03
251885_at	At3g54050	fructose-1,6-bisphosphatase, putative / D-fructose-1,6-bisphosphate 1-phosphohydrolase, putative / FBPase, putative	-1.96	-2.11	1.17E-02	3.23E-03
253643_at	At4g29780	expressed protein	1.64	2.92	1.17E-02	2.72E-02
253855_at	At4g28050	senescence-associated protein, putative	-1.87	-2.34	1.17E-02	2.10E-03
261648_at	At1g27730	zinc finger (C2H2 type) family protein (ZAT10) / salt-tolerance zinc finger protein (STZ)	9.63	11.92	1.17E-02	1.49E-02
263421_at	At2g17230	phosphate-responsive 1 family protein	-2.30	-2.04	1.17E-02	2.76E-05
267435_at	At2g33800	ribosomal protein S5 family protein	-2.07	-2.18	1.17E-02	7.52E-04
259491_at	At1g15820 At1g15810	chlorophyll A-B binding protein, chloroplast (LHCB6)	-1.43	-2.60	1.18E-02	1.97E-02
248507_at	At5g50420	expressed protein	-1.93	-2.23	1.19E-02	2.40E-04
263064_at	At2g18160	bZIP transcription factor family protein	-2.23	-2.36	1.19E-02	5.34E-04
263841_at	At2g36870	xyloglucan:xyloglucosyl transferase, putative / xyloglucan endotransglycosylase, putative / endo-xyloglucan transferase, putative	-2.75	-2.16	1.20E-02	4.35E-04
265917_at	At2g15080	disease resistance family protein	2.63	2.35	1.20E-02	3.34E-05
249694_at	At5g35790	plastidic glucose-6-phosphate dehydrogenase	-2.13	-1.89	1.21E-02	5.95E-04
258641_at	At3g08030	expressed protein	-4.44	-7.14	1.21E-02	3.41E-03
260107_at	At1g66430	pfkB-type carbohydrate kinase family protein	-3.56	-3.82	1.21E-02	3.31E-03
266231_at	At2g02220	leucine-rich repeat transmembrane protein kinase, putative	1.86	2.88	1.21E-02	3.83E-03
255733_at	At1g25400	expressed protein	3.64	4.87	1.22E-02	5.54E-03
257828_at	At3g26670	expressed protein	1.95	2.37	1.22E-02	6.84E-04
260494_at	At2g41820	leucine-rich repeat transmembrane protein kinase, putative	-1.72	-2.12	1.22E-02	6.96E-03
261788_at	At1g15980	expressed protein	-2.73	-2.31	1.22E-02	1.51E-03
262324_at	At1g64170	cation/hydrogen exchanger, putative (CHX16), monovalent cation:proton antiporter family 2 (CPA2) member	2.03	1.80	1.22E-02	2.61E-04
265987_at	At2g24240	potassium channel tetramerisation domain-containing protein	2.59	2.82	1.22E-02	3.51E-04
251193_at	At3g62910	peptide chain release factor, putative	-2.56	-1.96	1.23E-02	1.64E-03
252411_at	At3g47430	peroxisomal biogenesis factor 11 family protein / PEX11 family protein	-2.74	-1.98	1.23E-02	5.93E-04
254041_at	At4g25830	integral membrane family protein	-2.67	-2.72	1.23E-02	1.73E-04
260148_at	At1g52800	oxidoreductase, 2OG-Fe(II) oxygenase family protein	2.16	2.48	1.23E-02	2.09E-03
263131_at	At1g78630	ribosomal protein L13 family protein	-2.16	-2.84	1.23E-02	3.83E-03
266365_at	At2g41220	glutamate synthase, chloroplast (GLU2) / ferredoxin-dependent glutamate synthase (Fd-GOGAT 2)	1.86	2.06	1.23E-02	2.72E-03
251063_at	At5g01850	protein kinase, putative	2.86	2.77	1.24E-02	4.96E-04
250233_at	At5g13460	calmodulin-binding family protein	-2.62	-2.57	1.25E-02	1.29E-04
250723_at	At5g06300	expressed protein	1.49	2.05	1.25E-02	1.72E-02
251157_at	At3g63140	mRNA-binding protein, putative	-2.05	-2.87	1.25E-02	1.05E-02
251883_at	At3g54210	ribosomal protein L17 family protein	-2.06	-2.08	1.25E-02	1.36E-03
249120_at	At5g43750	expressed protein	-3.88	-4.08	1.26E-02	7.01E-04
253406_at	At4g32890	zinc finger (GATA type) family protein, GATA transcription factor 3	-2.60	-2.77	1.26E-02	3.00E-02
257053_at	At3g15210	subfamily B-1 of ERF/AP2 transcription factor family (ATERF-4)	1.59	2.10	1.26E-02	8.23E-03
267138_s_at	At2g38240 At2g38230 At2g38210	oxidoreductase, 2OG-Fe(II) oxygenase family protein	-2.02	-1.47	1.26E-02	9.21E-05
248006_at	At5g56250	expressed protein	2.02	1.83	1.27E-02	6.78E-04
255627_at	At4g00955	expressed protein	1.70	2.15	1.27E-02	2.40E-03
262168_at	At1g74730	expressed protein	-2.01	-2.19	1.27E-02	4.15E-03
252648_at	At3g44630	disease resistance protein RPP1-WsB-like (TIR-NBS-LRR class), putative	2.06	3.85	1.28E-02	1.22E-02
262277_at	At1g68650	expressed protein	1.90	2.47	1.28E-02	1.12E-02
245543_at	At4g15260	UDP-glucoronosyl/UDP-glucosyl transferase family protein	2.30	2.30	1.29E-02	2.08E-02
248151_at	At5g54280 At5g54270	myosin heavy chain, putative	-1.40	-2.36	1.29E-02	7.91E-04
251036_at	At5g02160	expressed protein	-2.98	-4.67	1.29E-02	1.91E-03
252534_at	At3g46130	myb family transcription factor (MYB48)	-1.88	-2.56	1.29E-02	1.50E-02
257717_at	At3g18390	expressed protein	-2.35	-1.83	1.29E-02	5.86E-03
262283_at	At1g68590	plastid-specific 30S ribosomal protein 3, putative / PSRP-3, putative	-1.96	-2.17	1.29E-02	3.83E-03
245354_at	At4g17600	lil3 protein	-3.14	-2.42	1.30E-02	1.52E-03
247348_at	At5g63810	beta-galactosidase, putative / lactase, putative	-2.27	-2.71	1.30E-02	9.54E-04
248050_at	At5g56100	glycine-rich protein / oleosin	-2.14	-2.27	1.30E-02	5.35E-04
263182_at	At1g05575	expressed protein	4.41	6.77	1.30E-02	2.41E-03
258621_at	At3g02830	zinc finger (CCCH-type) family protein	-1.84	-2.03	1.31E-02	1.27E-02
259753_at	At1g71050	heavy-metal-associated domain-containing protein / copper chaperone (CCH)-related	-1.80	-2.60	1.31E-02	3.54E-02
245353_at	At4g16000	expressed protein	2.10	3.70	1.32E-02	4.65E-04
246098_at	At5g20400	oxidoreductase, 2OG-Fe(II) oxygenase family protein	1.96	2.56	1.32E-02	3.54E-03
247040_at	At5g67150	transferase family protein	-1.95	-2.11	1.32E-02	2.67E-03
248801_at	At5g47370	homeobox-leucine zipper protein 2 (HAT2) / HD-ZIP protein 2	-1.50	-2.07	1.32E-02	2.80E-02
254416_at	At4g21380	S-locus protein kinase, putative (ARK3)	2.58	2.98	1.32E-02	9.76E-03
258993_at	At3g08940	chlorophyll A-B binding protein (LHCB4.2)	-1.27	-2.74	1.32E-02	9.22E-03
259736_at	At1g64390	endo-1,4-beta-glucanase, putative / cellulase, putative	-3.83	-4.22	1.32E-02	9.55E-04
261981_at	At1g33811	GDSL-motif lipase/hydrolase family protein	-3.48	-5.46	1.32E-02	2.52E-03
249928_at	At5g22250	CCR4-NOT transcription complex protein, putative	2.85	3.99	1.33E-02	1.67E-02
252888_at	At4g39210	glucose-1-phosphate adenylyltransferase large subunit 3 (APL3) / ADP-glucose pyrophosphorylase	1.21	2.47	1.33E-02	7.65E-03
260116_at	At1g33960	avirulence-responsive protein / avirulence induced gene (AIG1)	1.06	5.53	1.33E-02	3.43E-04
261078_at	At1g07320	50S ribosomal protein L4, chloroplast (CL4)	-2.55	-2.71	1.33E-02	7.30E-03
259730_at	At1g77660	MORN (Membrane Occupation and Recognition Nexus) repeat-containing protein /phosphatidylinositol-4-phosphate 5-kinase-related	2.00	3.99	1.34E-02	8.27E-03
255285_at	At4g04630	expressed protein	-2.05	-2.60	1.35E-02	2.67E-04
261607_at	At1g49660	expressed protein	-3.00	-3.11	1.35E-02	1.08E-03
251150_at	At3g63120	cyclin family protein	-1.96	-2.40	1.36E-02	1.72E-04
253305_at	At4g33666 At4g33670	L-galactose dehydrogenase (L-GalDH)	-3.48	-3.83	1.36E-02	5.17E-04
262913_at	At1g59960	aldo/keto reductase, putative	2.04	2.00	1.36E-02	2.10E-02
250565_at	At5g08000	glycosyl hydrolase family protein 17	-2.13	-2.96	1.37E-02	3.28E-02
253495_at	At4g31850	pentatricopeptide (PPR) repeat-containing protein	-2.26	-1.87	1.37E-02	6.63E-03
253841_at	At4g27830	glycosyl hydrolase family 1 protein\	2.26	2.78	1.37E-02	5.94E-03
255825_at	At2g40475	expressed protein	-1.59	-2.09	1.37E-02	4.25E-03
257300_at	At3g28080	nodulin MtN21 family protein	-2.02	-1.85	1.37E-02	4.72E-03
263805_at	At2g40400	expressed protein	-2.21	-2.56	1.37E-02	1.56E-05
266776_at	At2g29070	ubiquitin fusion degradation UFD1 family protein	1.68	2.06	1.37E-02	3.05E-05
258076_at	At3g25920	50S ribosomal protein L15, chloroplast (CL15)	-2.75	-3.11	1.38E-02	2.59E-03
262309_at	At1g70820	phosphoglucomutase, putative / glucose phosphomutase, putative	-1.94	-2.12	1.38E-02	5.61E-03
249806_at	At5g23850	expressed protein	2.36	2.37	1.39E-02	2.32E-02
254235_at	At4g23750	subfamily B-5 of ERF/AP2 transcription factor family	-1.69	-2.19	1.39E-02	3.12E-02
266820_at	At2g44940	DREB subfamily A-4 of ERF/AP2 transcription factor family	-2.00	-1.70	1.39E-02	3.38E-04
260568_at	At2g43570	chitinase, putative	4.51	8.75	1.40E-02	4.17E-03
262496_at	At1g21790	expressed protein	-2.23	-2.24	1.40E-02	2.93E-03
262811_at	At1g11700	expressed protein	-3.45	-3.32	1.40E-02	9.77E-01
266767_at	At2g46910	plastid-lipid associated protein PAP / fibrillin family protein	-2.65	-3.16	1.40E-02	6.26E-03
250257_at	At5g13770 At5g13780	pentatricopeptide (PPR) repeat-containing protein	-2.09	-1.82	1.41E-02	1.44E-03
257672_at	At3g20300	expressed protein	-1.45	-2.04	1.41E-02	5.05E-05
246562_at	At5g15580	expressed protein	-1.90	-2.62	1.42E-02	3.71E-03
250335_at	At5g11650	hydrolase, alpha/beta fold family protein	1.93	2.38	1.42E-02	2.97E-02
256569_at	At3g19550	expressed protein	1.85	3.23	1.42E-02	1.20E-04
250960_at	At5g02940	expressed protein	-3.62	-3.52	1.43E-02	5.21E-03
262619_at	At1g06550	enoyl-CoA hydratase/isomerase family protein	-2.04	-1.91	1.43E-02	6.22E-04
263867_at	At2g36830	major intrinsic family protein / MIP family protein	-3.13	-2.94	1.43E-02	7.53E-03
247351_at	At5g63780 At5g63790	zinc finger (C3HC4-type RING finger) family protein	2.14	1.34	1.44E-02	6.39E-01
266921_at	At2g45970	member of the CYP86A subfamily of cytochrome p450 genes.	-1.67	-2.24	1.44E-02	2.17E-02
252343_at	At3g48610	phosphoesterase family protein	-1.56	-2.02	1.45E-02	7.26E-06
260388_at	At1g74070	peptidyl-prolyl cis-trans isomerase cyclophilin-type family protein	-2.79	-3.33	1.45E-02	8.12E-03
264799_at	At1g08550	violaxanthin de-epoxidase precursor, putative (AVDE1)	-1.98	-2.03	1.45E-02	9.24E-03
261481_at	At1g14260	zinc finger (C3HC4-type RING finger) family protein	1.49	2.16	1.46E-02	5.83E-03
265149_at	At1g51400 At1g51390	photosystem II 5 kD protein	-1.59	-3.18	1.46E-02	2.28E-03
247474_at	At5g62280	expressed protein	-1.38	-2.38	1.47E-02	1.58E-02
254448_at	At4g20870	fatty acid hydroxylase, putative	-2.27	-2.17	1.47E-02	2.27E-03
262847_at	At1g14840	Encodes a microtubule associated protein (MAP70-4)	-1.86	-2.35	1.47E-02	5.37E-03
250243_at	At5g13630	magnesium-chelatase subunit chlH, chloroplast, putative / Mg-protoporphyrin IX chelatase, putative (CHLH)	-2.06	-2.82	1.48E-02	1.96E-02
253946_at	At4g26790	GDSL-motif lipase/hydrolase family protein	-2.57	-2.44	1.48E-02	4.34E-03
264911_at	At1g60690	aldo/keto reductase family protein	-1.61	-2.08	1.49E-02	3.52E-02
253547_at	At4g30950	omega-6 fatty acid desaturase, chloroplast (FAD6) (FADC)	-2.00	-2.14	1.50E-02	2.61E-03
263431_at	At2g22170	lipid-associated family protein	-4.72	-3.65	1.50E-02	1.44E-04
264146_at	At1g02205	CER1 protein	-5.99	-8.33	1.50E-02	3.32E-03
247376_at	At5g63310	nucleotide diphosphate kinase II, chloroplast (NDPK2)	-2.27	-2.44	1.51E-02	1.70E-02
253104_at	At4g36010	pathogenesis-related thaumatin family protein	-3.08	-4.33	1.51E-02	2.26E-05
261005_at	At1g26420	FAD-binding domain-containing protein	1.99	3.10	1.51E-02	1.30E-03
257547_at	At3g13000	expressed protein	-2.47	-2.33	1.52E-02	2.19E-03
267412_at	At2g34940	vacuolar sorting receptor, putative	3.19	2.71	1.52E-02	1.31E-03
246613_at	At5g35360	acetyl-CoA carboxylase, biotin carboxylase subunit (CAC2)	-1.88	-2.36	1.53E-02	5.62E-03
251261_at	At3g62110	glycoside hydrolase family 28 protein / polygalacturonase (pectinase) family protein	-2.07	-1.88	1.53E-02	1.57E-02
248132_at	At5g54840	GTP-binding family protein	2.58	3.60	1.54E-02	4.87E-03
251788_at	At3g55420	expressed protein	-1.89	-2.04	1.54E-02	9.74E-04
254761_at	At4g13195	expressed protein	-2.07	-1.91	1.54E-02	2.72E-02
260431_at	At1g68190	zinc finger (B-box type) family protein	-1.68	-2.31	1.54E-02	5.15E-04
262768_at	At1g12990	glycosyl transferase family 17 protein	2.24	2.18	1.54E-02	1.27E-02
265682_at	At2g24390	similar to avirulence-responsive protein-related / avirulence induced gene (AIG) protein-related	1.54	2.09	1.54E-02	3.36E-02
251183_at	At3g62630	expressed protein	-1.50	-2.00	1.55E-02	1.04E-03
260919_at	At1g21520	expressed protein	1.85	2.31	1.55E-02	3.26E-05
262238_at	At1g48310 At1g48300	SNF2 domain-containing protein / helicase domain-containing protein	-1.32	-2.21	1.55E-02	1.61E-03
253387_at	At4g33010	glycine dehydrogenase (decarboxylating), putative / glycine decarboxylase, putative / glycine cleavage system P-protein, putative	-2.10	-1.11	1.56E-02	1.81E-03
255677_at	At4g00500	lipase class 3 family protein / calmodulin-binding heat-shock protein-related	2.06	1.88	1.56E-02	2.38E-03
253736_at	At4g28780	GDSL-motif lipase/hydrolase family protein	-4.67	-6.17	1.57E-02	1.07E-02
255046_at	At4g09650	ATP synthase delta chain, chloroplast, putative / H(+)-transporting two-sector ATPase, delta (OSCP) subunit, putative	-2.51	-2.98	1.57E-02	5.22E-03
255654_at	At4g00970	protein kinase family protein	1.32	2.02	1.57E-02	4.28E-03
258483_at	At3g02570	phosphomannose isomerase type I family protein	-2.20	-2.56	1.57E-02	1.11E-03
260955_at	At1g06000	UDP-glucoronosyl/UDP-glucosyl transferase family protein	1.73	2.59	1.57E-02	8.62E-03
261197_at	At1g12900	glyceraldehyde 3-phosphate dehydrogenase, chloroplast, putative / NADP-dependent glyceraldehydephosphate dehydrogenase, putative	-2.23	-2.82	1.57E-02	2.56E-03
263034_at	At1g24020	Bet v I allergen family protein	-4.27	-4.41	1.57E-02	5.22E-04
261131_at	At1g19835	expressed protein	-2.05	-2.19	1.58E-02	7.71E-04
259681_at	At1g77760	nitrate reductase 1 (NR1)	2.49	2.26	1.59E-02	1.24E-04
257615_at	At3g26510	octicosapeptide/Phox/Bem1p (PB1) domain-containing protein	2.11	1.62	1.60E-02	3.86E-02
260541_at	At2g43530	defensin-like (DEFL) family protein.	-3.95	-2.86	1.60E-02	5.16E-04
247210_at	At5g65020	annexin 2 (ANN2)	-2.65	-1.99	1.61E-02	1.04E-03
250983_at	At5g02780	In2-1 protein, putative	1.66	2.69	1.61E-02	7.36E-04
254132_at	At4g24660	zinc finger homeobox family protein / ZF-HD homeobox family protein	-2.33	-2.62	1.61E-02	1.16E-03
256433_at	At3g10985	wound-responsive protein-related	2.56	2.05	1.61E-02	4.07E-03
261942_at	At1g22590	MADS-box family protein	-2.99	-2.65	1.61E-02	1.49E-03
245264_at	At4g17245	zinc finger (C3HC4-type RING finger) family protein	2.25	1.51	1.62E-02	9.94E-02
253533_at	At4g31590	glycosyl transferase family 2 protein,	-2.08	-2.56	1.62E-02	7.82E-04
258920_at	At3g10520	non-symbiotic hemoglobin 2 (HB2) (GLB2)	-1.49	-2.19	1.62E-02	1.90E-03
254126_at	At4g24770	31 kDa ribonucleoprotein, chloroplast, putative / RNA-binding protein RNP-T, putative / RNA-binding protein 1/2/3, putative / RNA-binding protein cp31, putative	-2.29	-2.23	1.63E-02	3.07E-03
255078_at	At4g09010	L-ascorbate peroxidase, chloroplast, putative	-3.11	-3.68	1.63E-02	7.72E-03
260037_at	At1g68840	DNA-binding protein RAV2 (RAV2) / AP2 domain-containing protein RAP2.8	3.45	2.14	1.63E-02	1.29E-05
247903_at	At5g57340	expressed protein	-2.50	-3.27	1.64E-02	4.81E-04
248526_at	At5g50730	expressed protein	-2.16	-2.78	1.64E-02	3.55E-03
251621_at	At3g57700	protein kinase, putative	2.03	2.67	1.64E-02	4.36E-02
256655_at	At3g18890	expressed protein, similar to UV-B and ozone similarly regulated protein 1 UOS1 (Pisum sativum)	-2.26	-3.01	1.64E-02	3.11E-02
256825_at	At3g22120	protease inhibitor/seed storage/lipid transfer protein (LTP) family protein	-3.80	-4.35	1.64E-02	6.59E-03
265723_at	At2g32140	disease resistance protein (TIR class), putative	2.24	6.67	1.64E-02	2.14E-02
245196_at	At1g67750	pectate lyase family protein	-2.40	-2.27	1.67E-02	5.78E-03
256178_s_at	At1g51760 At1g51780	IAA-amino acid hydrolase 3 / IAA-Ala hydrolase 3	2.84	3.04	1.67E-02	7.73E-02
256873_at	At3g26310	cytochrome P450 family protein	-1.60	-2.08	1.67E-02	2.31E-02
259231_at	At3g11410	protein phosphatase 2C, putative / PP2C, putative	-1.67	-2.11	1.67E-02	3.98E-04
266118_at	At2g02130	plant defensin-fusion protein, putative (PDF2.3)	-2.02	-1.80	1.67E-02	2.88E-03
261663_at	At1g18330	myb family transcription factor	-1.85	-3.28	1.68E-02	2.08E-02
262029_at	At1g35680	50S ribosomal protein L21, chloroplast / CL21 (RPL21)	-2.12	-2.34	1.68E-02	6.87E-03
264837_at	At1g03600	photosystem II family protein	-2.02	-2.29	1.68E-02	6.89E-03
266357_at	At2g32290	beta-amylase, putative / 1,4-alpha-D-glucan maltohydrolase, putative	-2.75	-1.78	1.69E-02	9.42E-03
251736_at	At3g56130	biotin/lipoyl attachment domain-containing protein	-1.91	-2.14	1.70E-02	1.59E-02
259680_at	At1g77690	amino acid permease, putative	-2.09	-1.97	1.70E-02	2.81E-02
260969_at	At1g12240	beta-fructosidase (BFRUCT4) / beta-fructofuranosidase / invertase, vacuolar	-2.42	-2.88	1.70E-02	1.68E-04
254120_at	At4g24570	mitochondrial substrate carrier family protein	3.51	6.22	1.71E-02	1.15E-02
259193_at	At3g01480	peptidyl-prolyl cis-trans isomerase, putative / cyclophilin, putative / rotamase, putative	-1.80	-2.40	1.71E-02	3.37E-03
265116_at	At1g62480	vacuolar calcium-binding protein-related	-1.91	-2.20	1.71E-02	4.62E-03
260399_at	At1g72520	lipoxygenase, putative	1.90	3.37	1.72E-02	4.22E-01
261769_at	At1g76100	plastocyanin	-1.58	-2.11	1.72E-02	7.76E-03
257895_at	At3g16950	dihydrolipoamide dehydrogenase 1, plastidic / lipoamide dehydrogenase 1 (PTLPD1)	-1.82	-2.11	1.73E-02	3.78E-02
255440_at	At4g02530	chloroplast thylakoid lumen protein	-2.20	-1.96	1.74E-02	2.11E-03
262235_at	At1g48350	ribosomal protein L18 family protein	-2.09	-2.40	1.74E-02	7.57E-03
267057_at	At2g32500	expressed protein	-2.60	-2.43	1.74E-02	3.27E-03
250604_at	At5g07830	glycosyl hydrolase family 79 N-terminal domain-containing protein	1.54	2.28	1.75E-02	8.15E-06
254485_at	At4g20760	short-chain dehydrogenase/reductase (SDR) family protein	-1.93	-2.08	1.75E-02	2.19E-03
246932_at	At5g25190	subfamily B-6 of ERF/AP2 transcription factor family	-2.11	-2.36	1.76E-02	8.10E-04
253103_at	At4g36110	auxin-responsive protein, putative	2.23	2.48	1.76E-02	5.01E-03
255735_at	At1g25520	expressed protein	1.76	2.45	1.76E-02	2.18E-02
262151_at	At1g52510	hydrolase, alpha/beta fold family protein	-1.66	-2.53	1.76E-02	2.52E-02
262383_at	At1g72940	disease resistance protein (TIR-NBS class), putative	3.29	4.76	1.76E-02	4.93E-03
250493_at	At5g09800	U-box domain-containing protein	1.78	2.10	1.77E-02	7.43E-04
251084_at	At5g01520	zinc finger (C3HC4-type RING finger) family protein	-2.13	-2.33	1.77E-02	3.22E-03
252441_at	At3g46780	expressed protein	-2.16	-4.78	1.78E-02	1.14E-02
263142_at	At1g65230	expressed protein	-2.02	-2.10	1.78E-02	1.69E-03
249377_at	At5g40690	expressed protein	1.78	2.72	1.79E-02	8.53E-06
251864_at	At3g54920	pectate lyase, putative / powdery mildew susceptibility protein (PMR6)	-2.02	-2.23	1.79E-02	1.04E-03
262172_at	At1g74970	ribosomal protein S9 (RPS9)	-2.10	-2.65	1.79E-02	1.56E-02
263265_at	At2g38820	expressed protein	-1.06	-2.10	1.79E-02	6.12E-03
266904_at	At2g34590	transketolase family protein	-1.86	-2.16	1.80E-02	1.55E-02
250480_at	At5g10290	leucine-rich repeat family protein / protein kinase family protein	1.72	2.79	1.81E-02	9.50E-03
255728_at	At1g25500	choline transporter-related	1.88	2.23	1.81E-02	2.01E-03
261934_at	At1g22400	UDP-glucoronosyl/UDP-glucosyl transferase family protein	1.00	2.56	1.81E-02	2.49E-03
252619_at	At3g45210	expressed protein	-1.93	-2.28	1.82E-02	3.22E-01
253372_at	At4g33220	pectinesterase family protein	-2.20	-2.39	1.82E-02	2.40E-02
256438_s_at	At2g40205 At3g08520 At3g11120 At3g56020	60S ribosomal protein L41	1.42	2.09	1.83E-02	2.95E-01
245448_at	At4g16860	disease resistance protein (TIR-NBS-LRR class), putative	1.64	2.79	1.84E-02	1.28E-02
249327_at	At5g40890	chloride channel protein (CLC-a)	-4.39	-4.76	1.85E-02	3.87E-03
253109_at	At4g35920	expressed protein	-1.82	-2.21	1.85E-02	1.06E-02
257083_s_at	At3g20600 At3g20590	non-race specific disease resistance protein (NDR1)	1.76	2.50	1.86E-02	2.46E-03
252193_at	At3g50060	myb family transcription factor	1.76	3.29	1.87E-02	2.44E-03
262884_at	At1g64720	expressed protein	-1.59	-2.40	1.87E-02	1.38E-02
245789_at	At1g32090	early-responsive to dehydration protein-related / ERD protein-related	-2.15	-2.45	1.88E-02	1.76E-02
256145_at	At1g48750 At1g48760	protease inhibitor/seed storage/lipid transfer protein (LTP) family protein	-2.16	-2.56	1.88E-02	4.54E-04
261308_at	At1g48480	leucine-rich repeat transmembrane protein kinase, putative	-2.16	-2.32	1.88E-02	6.30E-03
250777_at	At5g05440	expressed protein	1.82	2.07	1.89E-02	3.07E-03
251775_s_at	At2g39800 At3g55610	delta 1-pyrroline-5-carboxylate synthetase A / P5CS A (P5CS1)	-2.04	-2.05	1.89E-02	9.90E-07
255822_at	At2g40610	expansin, putative (EXP8)	-3.72	-6.33	1.89E-02	1.43E-02
247655_at	At5g59820	zinc finger (C2H2 type) family protein (ZAT12)	2.07	3.31	1.90E-02	2.75E-03
252391_at	At3g47860	apolipoprotein D-related	-1.80	-3.37	1.90E-02	6.79E-03
253285_at	At4g34250	fatty acid elongase, putative	-2.10	-2.25	1.90E-02	4.75E-04
263866_at	At2g36950	heavy-metal-associated domain-containing protein	-1.54	-2.15	1.90E-02	3.58E-04
267078_at	At2g40960	expressed protein	-2.12	-2.14	1.90E-02	4.62E-02
249055_at	At5g44460	calcium-binding protein, putative	1.73	2.07	1.91E-02	6.80E-04
249527_at	At5g38710	proline oxidase, putative / osmotic stress-responsive proline dehydrogenase, putative	6.14	10.58	1.91E-02	6.89E-05
260754_at	At1g49000	expressed protein	1.68	2.75	1.91E-02	3.00E-03
245209_at	At5g12340	expressed protein	2.62	3.19	1.92E-02	3.17E-02
245734_at	At1g73480	hydrolase, alpha/beta fold family protein	-1.36	-2.92	1.92E-02	2.31E-02
250595_at	At5g07770	formin homology 2 domain-containing protein / FH2 domain-containing protein	2.43	1.93	1.93E-02	3.89E-04
265111_at	At1g62510	protease inhibitor/seed storage/lipid transfer protein (LTP) family protein	-2.39	-3.24	1.93E-02	2.75E-04
258676_at	At3g08600	expressed protein	-2.08	-1.77	1.94E-02	4.96E-02
259308_at	At3g05180	GDSL-motif lipase/hydrolase family protein	-2.34	-2.05	1.94E-02	5.06E-03
247543_at	At5g61600	subfamily B-3 of ERF/AP2 transcription factor family	4.26	5.19	1.96E-02	4.51E-02
249314_at	At5g41180	leucine-rich repeat protein kinase, putative	1.65	2.31	1.96E-02	1.56E-03
255732_at	At1g25450	very-long-chain fatty acid condensing enzyme, putative	-1.60	-2.20	1.96E-02	1.18E-03
247324_at	At5g64200 At5g64190	arginine/serine-rich splicing factor SC35	2.77	1.61	1.97E-02	3.55E-03
258445_at	At3g22400	lipoxygenase, putative	1.16	2.65	1.97E-02	1.51E-03
253875_at	At4g27520	plastocyanin-like domain-containing protein	-2.92	-3.58	1.98E-02	1.07E-02
252427_at	At3g47640	basic helix-loop-helix (bHLH) family protein	-1.92	-2.02	2.00E-02	9.08E-03
262414_at	At1g49430	long-chain-fatty-acid--CoA ligase / long-chain acyl-CoA synthetase	-2.16	-2.37	2.00E-02	1.03E-03
255596_at	At4g01720	WRKY family transcription factor	2.09	3.44	2.01E-02	1.79E-02
264057_at	At2g28550	AP2 domain-containing transcription factor RAP2.7 (RAP2.7)	-1.29	-2.04	2.01E-02	1.52E-01
256962_at	At3g13560	glycosyl hydrolase family 17 protein	1.08	2.37	2.02E-02	1.59E-03
251519_at	At3g59400	expressed protein	-1.81	-2.70	2.03E-02	5.10E-04
252130_at	At3g50820	extrinsic subunit of photosystem II	-1.81	-2.28	2.03E-02	2.33E-03
251858_at	At3g54820	aquaporin, putative	-2.02	-1.75	2.04E-02	1.40E-03
258087_at	At3g26060	peroxiredoxin Q, putative	-3.18	-3.56	2.04E-02	3.91E-03
248763_at	At5g47550	cysteine protease inhibitor, putative / cystatin, putative	-1.79	-2.23	2.05E-02	8.73E-03
258684_at	At3g08680	leucine-rich repeat transmembrane protein kinase, putative	-2.34	-2.42	2.05E-02	2.06E-02
261309_at	At1g48600	phosphoethanolamine N-methyltransferase 2, putative (NMT2)	-2.43	-2.62	2.05E-02	4.47E-03
250470_at	At5g10160	beta-hydroxyacyl-ACP dehydratase, putative	-2.07	-2.41	2.06E-02	6.08E-03
250764_at	At5g05960	protease inhibitor/seed storage/lipid transfer protein (LTP) family protein	-2.05	-1.11	2.07E-02	2.20E-02
248167_at	At5g54530	expressed protein	-1.73	-2.02	2.08E-02	4.45E-03
255298_at	At4g04840	methionine sulfoxide reductase domain-containing protein / SeIR domain-containing protein	-4.18	-7.14	2.08E-02	1.23E-03
251584_at	At3g58620	tetratricopeptide repeat (TPR)-containing protein	-2.14	-2.32	2.09E-02	4.43E-04
252993_at	At4g38540	monooxygenase, putative (MO2), identical to GI:3426064	3.60	3.13	2.09E-02	1.21E-02
264147_at	At1g02205	CER1 protein	-5.49	-5.95	2.11E-02	4.59E-03
253099_s_at	At4g37530 At4g37520	peroxidase, putative	1.56	3.02	2.12E-02	1.67E-03
261700_at	At1g32690	expressed protein	1.75	2.22	2.13E-02	2.49E-03
252970_at	At4g38850	auxin-responsive protein / small auxin up RNA (SAUR-AC1)	-1.82	-2.16	2.14E-02	1.60E-02
246313_at	At1g31920	pentatricopeptide (PPR) repeat-containing protein	-2.62	-2.11	2.15E-02	3.66E-03
254910_at	At4g11175	translation initiation factor IF-1, chloroplast, putative	-2.04	-1.59	2.15E-02	2.16E-03
250012_x_at	At5g18060	auxin-responsive protein, putative	-1.87	-3.32	2.16E-02	9.19E-06
250110_at	At5g15350	plastocyanin-like domain-containing protein	-2.86	-2.44	2.16E-02	2.33E-03
260109_at	At1g63260	senescence-associated family protein	-1.89	-2.16	2.16E-02	7.52E-04
261119_at	At1g75350	ribosomal protein L31 family protein	-2.08	-2.04	2.16E-02	4.58E-03
263433_at	At2g22240	inositol-3-phosphate synthase isozyme 2 / myo-inositol-1-phosphate synthase 2 / MI-1-P synthase 2 / IPS 2	-2.11	-1.84	2.17E-02	1.19E-02
264000_at	At2g22500	mitochondrial substrate carrier family protein	2.06	3.24	2.17E-02	6.92E-03
249944_at	At5g22290	no apical meristem (NAM) family protein	1.82	2.22	2.18E-02	3.31E-04
249410_at	At5g40380	protein kinase family protein	-2.03	-2.34	2.20E-02	2.42E-04
252863_at	At4g39800	inositol-3-phosphate synthase isozyme 1 / myo-inositol-1-phosphate synthase 1 / MI-1-P synthase 1 / IPS 1	-2.19	-2.09	2.20E-02	5.49E-03
255502_at	At4g02410	lectin protein kinase family protein	1.65	2.11	2.20E-02	1.25E-03
259443_at	At1g02360	chitinase, putativ	3.24	2.58	2.20E-02	5.92E-04
259553_x_at	At1g21310	proline-rich extensin-like family protein	1.65	2.41	2.20E-02	6.21E-03
263777_at	At2g46450	cyclic nucleotide-regulated ion channel, putative	2.02	2.02	2.20E-02	9.65E-03
260881_at	At1g21550	calcium-binding protein, putative	2.47	3.65	2.21E-02	2.10E-03
247706_at	At5g59480	haloacid dehalogenase-like hydrolase family protein	-2.56	-2.63	2.22E-02	7.74E-03
253871_at	At4g27440	protochlorophyllide reductase B, chloroplast / PCR B / NADPH-protochlorophyllide oxidoreductase B (PORB)	-1.61	-2.42	2.23E-02	2.62E-05
254707_at	At4g18010	inositol polyphosphate 5-phosphatase II (IP5PII)	2.33	3.97	2.24E-02	2.50E-02
245783_s_at	At1g35180 At1g35170	expressed protein	-2.28	-3.04	2.25E-02	6.43E-03
252450_s_at	At3g47090 At3g47580	leucine-rich repeat transmembrane protein kinase, putative, receptor kinase-like protein (Xa21)	2.49	4.53	2.25E-02	6.85E-03
265475_at	At2g15620	ferredoxin--nitrite reductase, putative	-1.50	-2.22	2.25E-02	3.61E-02
246792_at	At5g27290	expressed protein	-3.08	-3.83	2.26E-02	5.55E-03
253124_at	At4g36030	armadillo/beta-catenin repeat family protein	1.77	2.71	2.27E-02	1.67E-03
249986_at	At5g18460	expressed protein	-1.60	-2.14	2.28E-02	3.60E-03
253891_at	At4g27720	expressed protein	-2.02	-1.51	2.29E-02	6.53E-04
249797_at	At5g23750	remorin family protein	-2.17	-2.58	2.30E-02	3.04E-02
254210_at	At4g23450	zinc finger (C3HC4-type RING finger) family protein	2.31	2.76	2.30E-02	1.13E-02
255564_s_at	At4g01770 At4g01750	expressed protein	1.53	2.86	2.31E-02	3.25E-03
256753_at	At3g27160	ribosomal protein S21 family protein	-2.70	-3.01	2.31E-02	5.84E-03
260387_at	At1g74100	sulfotransferase family protein	1.58	2.19	2.32E-02	3.62E-02
247709_at	At5g59250	sugar transporter family protein	-1.60	-2.17	2.33E-02	6.30E-06
256979_at	At3g21055	photosystem II 5 kD protein, putative	-1.67	-2.43	2.34E-02	8.45E-03
260877_at	At1g21500	expressed protein	-2.14	-4.20	2.34E-02	7.94E-03
260900_s_at	At1g21400 At5g34780	2-oxoisovalerate dehydrogenase, putative / 3-methyl-2-oxobutanoate dehydrogenase, putative / branched-chain alpha-keto acid dehydrogenase E1 alpha subunit, putative	1.83	2.35	2.35E-02	4.67E-02
264042_at	At2g03760	steroid sulfotransferase, putative	3.81	2.99	2.35E-02	1.75E-01
245592_at	At4g14540	CCAAT-box binding transcription factor subunit B (NF-YB) (HAP3 ) (AHAP3) family	-2.21	-2.11	2.36E-02	4.24E-04
254150_at	At4g24350	phosphorylase family protein	-3.55	-6.13	2.38E-02	2.34E-03
254300_at	At4g22780	ACT domain-containing protein (ACR7)	1.56	3.19	2.38E-02	5.08E-03
254137_at	At4g24930	thylakoid lumenal 17.9 kDa protein, chloroplast	-2.10	-1.93	2.39E-02	1.10E-02
265893_at	At2g15040	disease resistance protein-related	3.13	3.10	2.39E-02	6.87E-03
256772_at	At3g13750	beta-galactosidase, putative / lactase, putative	-3.55	-3.31	2.40E-02	4.45E-04
245745_at	At1g51110	plastid-lipid associated protein PAP / fibrillin family protein	-1.99	-2.27	2.42E-02	1.17E-02
251920_at	At3g53900	uracil phosphoribosyltransferase, putative / UMP pyrophosphorylase, putative / UPRTase, putative	-1.74	-2.13	2.42E-02	2.35E-02
251899_at	At3g54400	aspartyl protease family protein	-3.70	-3.98	2.43E-02	7.84E-03
252940_at	At4g39270	leucine-rich repeat transmembrane protein kinase, putative, receptor protein kinase erecta	2.38	2.82	2.43E-02	1.59E-03
252954_at	At4g38660	thaumatin, putative	-2.05	-2.29	2.43E-02	1.62E-03
251402_at	At3g60290	oxidoreductase, 2OG-Fe(II) oxygenase family protein	-3.37	-4.08	2.44E-02	5.22E-03
262666_at	At1g14080	xyloglucan fucosyltransferase, putative (FUT6)	1.69	2.54	2.44E-02	5.29E-04
248910_at	At5g45820	CBL-interacting protein kinase 20 (CIPK20)	-2.26	-2.80	2.45E-02	9.98E-04
260327_at	At1g63840	zinc finger (C3HC4-type RING finger) family protein	1.88	2.82	2.45E-02	8.03E-03
262729_at	At1g75840	Rac-like GTP-binding protein (ARAC5) / Rho-like GTP-binding protein (ROP4)	-2.03	-1.67	2.45E-02	1.06E-03
260784_at	At1g06180	myb family transcription factor	2.79	2.78	2.46E-02	2.83E-03
267614_at	At2g26710	cytochrome p450 family. Involved in brassinolide metabolism	-1.65	-2.22	2.46E-02	8.42E-05
266865_at	At2g29980	omega-3 fatty acid desaturase, endoplasmic reticulum (FAD3)	-1.84	-2.51	2.48E-02	2.58E-02
258804_at	At3g04760	pentatricopeptide (PPR) repeat-containing protein	-2.02	-1.40	2.49E-02	4.28E-03
267337_at	At2g39980	transferase family protein	2.12	1.35	2.49E-02	2.40E-01
254102_at	At4g25050	acyl carrier family protein / ACP family protein	-2.06	-2.34	2.51E-02	6.02E-03
258708_at	At3g09580	amine oxidase family protein	-2.22	-1.92	2.52E-02	1.90E-03
263221_at	At1g30620	UDP-D-xylose 4-epimerase, putative (MUR4)	1.36	2.07	2.52E-02	3.10E-03
266979_at	At2g39470	photosystem II reaction center PsbP family protein	-2.63	-2.54	2.54E-02	2.85E-03
267088_at	At2g38140	chloroplast 30S ribosomal protein S31 (PSRP4)	-2.22	-2.20	2.56E-02	1.15E-02
251846_at	At3g54560	histone H2A.F/Z	1.39	2.82	2.57E-02	2.86E-02
248200_at	At5g54160	quercetin 3-O-methyltransferase 1 / flavonol 3-O-methyltransferase 1 / caffeic acid/5-hydroxyferulic acid O-methyltransferase (OMT1)	-1.87	-2.08	2.58E-02	2.96E-02
251461_at	At3g59780	expressed protein	-1.79	-2.10	2.60E-02	2.14E-05
262376_at	At1g72970	glucose-methanol-choline (GMC) oxidoreductase family protein	-2.59	-2.82	2.61E-02	1.31E-02
248179_at	At5g54380	protein kinase family protein	-2.48	-2.34	2.64E-02	3.62E-05
251796_at	At3g55360	Enoyl-CoA reductase (ECA), involved in all very long chain fatty acids elongation reactions required for cuticular wax, storage lipid and sphingolipid metabolism.	-1.68	-2.05	2.64E-02	1.37E-02
253268_s_at	At4g34120 At4g34131 At4g34135	CBS domain-containing protein	2.34	3.29	2.64E-02	1.72E-02
246781_at	At5g27350	sugar-porter family protein 1 (SFP1)	-2.09	-1.77	2.65E-02	8.60E-03
249929_at	At5g22340	expressed protein	-1.92	-2.04	2.65E-02	3.22E-02
259237_at	At3g11630	2-cys peroxiredoxin, chloroplast (BAS1)	-1.77	-2.23	2.66E-02	1.50E-02
252134_at	At3g50910	expressed protein	2.23	2.46	2.67E-02	7.70E-05
256376_s_at	At1g66690 At1g66700	S-adenosyl-L-methionine:carboxyl methyltransferase family protein	1.39	3.00	2.67E-02	4.39E-04
255302_at	At4g04830	methionine sulfoxide reductase domain-containing protein / SeIR domain-containing protein	-2.51	-2.42	2.71E-02	2.13E-04
250441_at	At5g10540	peptidase M3 family protein / thimet oligopeptidase family protein	-1.88	-2.02	2.73E-02	3.47E-02
259161_at	At3g01500	carbonic anhydrase 1, chloroplast / carbonate dehydratase 1 (CA1)	-4.17	-7.35	2.73E-02	2.56E-03
264365_s_at	At1g03220 At1g03230	extracellular dermal glycoprotein, putative / EDGP, putative	-1.64	-2.26	2.75E-02	5.95E-04
266292_at	At2g29350	tropinone reductase, putative / tropine dehydrogenase, putative	2.14	7.13	2.76E-02	3.89E-03
261054_at	At1g01320	tetratricopeptide repeat (TPR)-containing protein	-2.02	-1.30	2.79E-02	7.29E-03
264339_at	At1g70290	trehalose-6-phosphate synthase, putative	2.17	1.67	2.80E-02	1.59E-03
249383_at	At5g39860	bHLH protein, putative DNA-binding protein	-1.96	-2.55	2.81E-02	4.90E-03
253286_at	At4g34260	expressed protein	-2.85	-3.15	2.81E-02	2.52E-02
245744_at	At1g51110	plastid-lipid associated protein PAP / fibrillin family protein	-1.73	-2.15	2.85E-02	1.80E-02
253859_at	At4g27657	expressed protein	1.43	2.93	2.86E-02	7.52E-01
259640_at	At1g52400	glycosyl hydrolase family 1 protein / beta-glucosidase, putative (BG1)	-2.82	-3.24	2.86E-02	2.58E-02
262920_at	At1g79500	2-dehydro-3-deoxyphosphooctonate aldolase / phospho-2-dehydro-3-deoxyoctonate aldolase / 3-deoxy-D-manno-octulosonic acid 8-phosphate synthetase (KDSA)	-1.69	-2.31	2.86E-02	8.66E-05
265620_at	At2g27310	F-box family protein	2.63	2.65	2.86E-02	3.75E-03
266299_at	At2g29450	glutathione S-transferase (103-1A)	-1.69	-2.79	2.87E-02	1.59E-03
251665_at	At3g57040	two-component responsive regulator / response reactor 4 (RR4),	-2.00	-2.00	2.89E-02	2.81E-03
253679_at	At4g29610	cytidine deaminase, putative / cytidine aminohydrolase, putative	-1.79	-2.21	2.89E-02	8.77E-06
255850_at	At2g33450	50S ribosomal protein L28, chloroplast (CL28)	-2.07	-2.38	2.89E-02	1.59E-02
267170_at	At2g37585	glycosyltransferase family 14 protein / core-2/I-branching enzyme family protein	-1.79	-2.03	2.90E-02	1.64E-02
252383_at	At3g47780	ABC transporter family protein, transport protein ABC-C	1.17	2.61	2.91E-02	8.54E-04
252679_at	At3g44260	CCR4-NOT transcription complex protein, putative	2.93	4.91	2.96E-02	9.55E-03
247707_at	At5g59450	scarecrow-like transcription factor 11 (SCL11)	1.67	2.35	2.97E-02	4.72E-02
246478_at	At5g15980	pentatricopeptide (PPR) repeat-containing protein	1.66	2.06	2.99E-02	2.36E-03
261216_at	At1g33030	O-methyltransferase family 2 protein	2.51	2.71	3.00E-02	3.11E-03
251039_at	At5g02020	expressed protein	2.84	3.16	3.01E-02	6.38E-02
264879_at	At1g61260	expressed protein	1.43	2.40	3.03E-02	9.50E-01
266239_at	At2g29530	mitochondrial import inner membrane translocase (TIM10)	1.40	2.01	3.03E-02	2.74E-01
264383_at	At2g25080	phospholipid hydroperoxide glutathione peroxidase, chloroplast / PHGPx (GPX1)	-1.68	-2.42	3.07E-02	2.10E-02
261394_at	At1g79680	wall-associated kinase, putative	2.02	2.74	3.11E-02	5.95E-03
254163_s_at	At4g24370 At4g24340 At4g24350	phosphorylase family protein	-2.54	-4.72	3.13E-02	1.67E-03
266097_at	At2g37970	SOUL heme-binding family protein	1.56	2.49	3.13E-02	2.03E-03
248657_at	At5g48570	peptidyl-prolyl cis-trans isomerase, putative / FK506-binding protein, putative	2.12	1.85	3.15E-02	5.32E-03
261684_at	At1g47400	expressed protein	-2.64	-3.56	3.18E-02	8.30E-03
258100_at	At3g23550	MATE efflux family protein	4.72	2.74	3.19E-02	2.41E-02
245711_at	At5g04340	zinc finger (C2H2 type) family protein	4.46	3.24	3.20E-02	3.60E-02
263202_at	At1g05630	endonuclease/exonuclease/phosphatase family protein	2.05	1.97	3.20E-02	1.41E-02
264524_at	At1g10070	branched-chain amino acid aminotransferase 2 / branched-chain amino acid transaminase 2 (BCAT2)	5.14	6.89	3.20E-02	5.96E-05
265276_at	At2g28400	expressed protein	2.26	1.64	3.20E-02	3.48E-01
265819_at	At2g17972	expressed protein	-2.06	-1.85	3.22E-02	1.02E-02
251142_at	At5g01015	expressed protein	-3.26	-3.46	3.24E-02	1.80E-02
262464_at	At1g50280	phototropic-responsive NPH3 family protein	-2.33	-2.16	3.24E-02	1.08E-03
249742_at	At5g24490	30S ribosomal protein, putative	-2.09	-3.00	3.29E-02	1.52E-02
255549_at	At4g01950	member of a family of proteins with glycerol-3-phosphate acyltransferase activity.	-2.10	-2.01	3.29E-02	5.50E-04
246275_at	At4g36540	basic helix-loop-helix (bHLH) family protein	-2.29	-3.47	3.30E-02	3.89E-03
261242_at	At1g32960	subtilase family protein	2.05	1.68	3.30E-02	4.38E-03
266165_at	At2g28190	superoxide dismutase (Cu-Zn), chloroplast (SODCP) / copper/zinc superoxide dismutase (CSD2)	-2.16	-1.77	3.32E-02	1.06E-04
253842_at	At4g27860	integral membrane family protein	1.79	2.09	3.35E-02	3.32E-03
256300_at	At1g69490	no apical meristem (NAM) family protein	3.56	2.22	3.36E-02	3.04E-05
260208_s_at	At1g70670 At1g70680	caleosin-related family protein	-1.64	-2.02	3.37E-02	6.43E-03
254178_at	At4g23880	expressed protein	1.07	2.31	3.40E-02	1.02E-02
262616_at	At1g06620	2-oxoglutarate-dependent dioxygenase	2.02	2.38	3.40E-02	1.50E-03
267425_at	At2g34810	FAD-binding domain-containing protein	-2.10	-2.04	3.40E-02	2.72E-05
259010_at	At3g07340	basic helix-loop-helix (bHLH) family protein	-2.24	-2.51	3.41E-02	2.34E-04
247189_at	At5g65390	arabinogalactan-protein (AGP7)	-2.05	-1.99	3.42E-02	3.33E-03
258589_at	At3g04290	GDSL-motif lipase/hydrolase family protein	-3.15	-3.69	3.42E-02	4.30E-02
249188_at	At5g42830	transferase family protein	1.99	3.11	3.43E-02	8.59E-03
256969_at	At3g21080	ABC transporter-related	1.21	2.29	3.43E-02	1.33E-03
264386_at	At1g12000	pyrophosphate--fructose-6-phosphate 1-phosphotransferase beta subunit, putative / pyrophosphate-dependent 6-phosphofructose-1-kinase, putative	2.10	2.28	3.43E-02	3.48E-03
261979_at	At1g37130	nitrate reductase 2 (NR2)	2.05	1.75	3.44E-02	1.43E-03
254564_at	At4g19170	9-cis-epoxycarotenoid dioxygenase, putative / neoxanthin cleavage enzyme, putative / carotenoid cleavage dioxygenase, putative	-2.23	-2.22	3.46E-02	1.36E-01
248625_at	At5g48880	acetyl-CoA C-acyltransferase 1 / 3-ketoacyl-CoA thiolase 1 (PKT1)	-1.76	-2.12	3.50E-02	2.47E-06
249065_at	At5g44260	zinc finger (CCCH-type) family protein	-1.67	-2.67	3.52E-02	8.14E-03
250734_at	At5g06270	expressed protein	-2.01	-2.70	3.52E-02	1.61E-02
253806_at	At4g28270	zinc finger (C3HC4-type RING finger) family protein	2.04	1.63	3.54E-02	5.09E-04
252011_at	At3g52720	carbonic anhydrase family protein	-1.92	-2.14	3.55E-02	7.51E-03
258938_at	At3g10080	germin-like protein, putative	-2.16	-2.18	3.55E-02	2.24E-02
256666_at	At3g20670	histone H2A, putative3/H4	2.01	2.39	3.56E-02	5.11E-01
259104_at	At3g02170	expressed protein	-2.16	-1.88	3.56E-02	3.46E-04
245427_at	At4g17550	transporter-related	-1.92	-2.05	3.57E-02	3.93E-04
246596_at	At5g14740	carbonic anhydrase 2 / carbonate dehydratase 2 (CA2) (CA18)	-3.61	-2.82	3.61E-02	9.61E-04
256064_at	At1g07010 At1g07020	calcineurin-like phosphoesterase family protein	1.92	2.09	3.63E-02	3.24E-02
252624_at	At3g44735	phytosulfokines-related	-2.21	-1.59	3.64E-02	2.47E-04
259383_at	At3g16470	jacalin lectin family protein	-1.55	-2.68	3.64E-02	2.57E-02
248420_at	At5g51560	leucine-rich repeat transmembrane protein kinase, putative	-3.14	-3.24	3.65E-02	4.31E-03
258939_at	At3g10020	expressed protein	2.02	1.51	3.68E-02	2.87E-01
253830_at	At4g27652	expressed protein	1.46	2.97	3.69E-02	7.38E-01
263706_s_at	At1g31180 At5g14200	3-isopropylmalate dehydrogenase, chloroplast, putative	-2.08	-1.66	3.73E-02	4.90E-03
260015_at	At1g67980	caffeoyl-CoA 3-O-methyltransferase, putative	1.78	2.91	3.74E-02	4.28E-03
246401_at	At1g57560	myb family transcription factor (MYB50)	1.51	2.14	3.83E-02	1.28E-02
249645_at	At5g36910	thionin (THI2.2)	-1.33	-2.40	3.84E-02	5.47E-06
254398_at	At4g21280	oxygen-evolving enhancer protein 3, chloroplast, putative (PSBQ1) (PSBQ)	-1.54	-2.11	3.84E-02	2.36E-02
254785_at	At4g12730	fasciclin-like arabinogalactan-protein (FLA2)	-3.22	-4.00	3.88E-02	3.24E-04
258222_at	At3g15680	zinc finger (Ran-binding) family protein	-1.93	-2.31	3.88E-02	3.05E-05
248448_at	At5g51190	subfamily B-3 of ERF/AP2 transcription factor family	2.57	2.66	3.93E-02	2.64E-02
253908_at	At4g27260	IAA-amido synthase that conjugates Asp and other amino acids to auxin in vitro	2.41	1.87	4.00E-02	1.82E-04
264635_at	At1g65500	expressed protein	2.29	2.79	4.02E-02	1.56E-02
253874_at	At4g27450	expressed protein	2.77	2.30	4.05E-02	3.89E-02
262039_at	At1g80050	adenine phosphoribosyltransferase 2 (APT2)	-2.05	-1.81	4.06E-02	2.42E-03
257206_at	At3g16530	legume lectin family protein	2.41	1.13	4.12E-02	1.89E-02
257697_at	At3g12700	aspartyl protease family protein	-2.75	-3.77	4.13E-02	1.15E-02
255011_at	At4g10040	cytochrome c, putative	1.53	2.10	4.14E-02	7.61E-03
245928_s_at	At5g24770 At5g24780	vegetative storage protein 2 (VSP2)	-2.18	-13.28	4.15E-02	4.86E-03
258259_s_at	At3g26820 At3g26840	esterase/lipase/thioesterase family protein	2.69	4.41	4.17E-02	7.75E-03
261933_at	At1g22410	2-dehydro-3-deoxyphosphoheptonate aldolase, putative / 3-deoxy-D-arabino-heptulosonate 7-phosphate synthase, putative / DAHP synthetase, putative	1.27	2.17	4.17E-02	1.32E-03
255127_at	At4g08300	nodulin MtN21 family protein	1.67	2.57	4.19E-02	1.73E-05
257122_at	At3g20250	pumilio/Puf RNA-binding domain-containing protein	2.24	2.13	4.19E-02	6.47E-03
262118_at	At1g02850	glycosyl hydrolase family 1 protein	2.51	1.25	4.21E-02	3.35E-02
263222_at	At1g30640	protein kinase, putative	1.84	2.20	4.22E-02	8.60E-04
257927_at	At3g23240	subfamily B-3 of ERF/AP2 transcription factor family (ERF1)	2.00	1.86	4.28E-02	5.34E-03
261639_at	At1g50020 At1g50010	tubulin alpha-2/alpha-4 chain	-2.36	-2.60	4.35E-02	1.84E-02
263391_at	At2g11810	1,2-diacylglycerol 3-beta-galactosyltransferase, putative / monogalactosyldiacylglycerol synthase, putative / MGDG synthase, putative	-2.05	-2.07	4.36E-02	9.59E-03
250603_at	At5g07820	expressed protein	1.49	2.04	4.53E-02	1.71E-03
250828_at	At5g05250	expressed protein	-2.94	-4.50	4.57E-02	3.22E-02
253586_s_at	At4g30740 At4g30710	expressed protein	-1.85	-2.05	4.65E-02	2.35E-02
257219_at	At3g14930	uroporphyrinogen decarboxylase, putative / UPD, putative	-1.83	-2.20	4.65E-02	2.87E-03
257759_at	At3g23070	expressed protein	-2.24	-1.95	4.65E-02	4.66E-02
265183_at	At1g23750	DNA-binding protein-related	-2.17	-1.76	4.65E-02	1.59E-02
267623_at	At2g39650	expressed protein	1.50	2.55	4.65E-02	2.14E-02
248715_at	At5g48290	heavy-metal-associated domain-containing protein	1.54	2.09	4.67E-02	5.09E-03
245668_at	At1g28330	dormancy-associated protein, putative (DRM1)	-1.33	-2.20	4.73E-02	8.04E-04
248353_at	At5g52320	cytochrome P450, putative	-2.28	-2.70	4.73E-02	8.12E-03
248060_at	At5g55560	protein kinase family protein	1.74	2.10	4.76E-02	8.99E-03
264223_s_at	At3g16030	lectin protein kinase family protein	1.16	2.67	4.81E-02	2.48E-03
249197_at	At5g42380	calmodulin-related protein, putative	1.44	2.59	4.84E-02	9.84E-03
251861_at	At3g54810	zinc finger (GATA type) family protein, GATA transcription factor 3	1.41	2.20	4.91E-02	2.72E-02
261363_at	At1g41830	multi-copper oxidase type I family protein	-2.11	-1.88	4.91E-02	2.90E-03
254952_at	At4g10955 At4g10960	lipase class 3 family protein	2.08	2.09	4.93E-02	3.66E-02
256417_s_at	At3g11170 At5g05580	omega-3 fatty acid desaturase, chloroplast (FAD7) (FADD)	-2.05	-1.85	4.95E-02	5.64E-03
265572_at	At2g28210	carbonic anhydrase	-1.52	-2.14	4.99E-02	3.45E-02


 

							

						
							
							
							
							
							
							
							
							
							
							
							
							
							
							
							
							
							
							
							
							
							
							
							
							
							
							
							
							
							
							
							
							
							
							
							
							
							
							
							
							
							
							
							
							
							
							
							
							
							
							
							
							
							
							
							
							
							
							
							
							
							
							
							
							
							
							
							
							
							
							
							
							
							
							
							
							
							
							
							
							
							
							
							
							
							
							
							
							
							
							
							
							
							
							
							
							
							
							
							
							
							
							
							
							
							
							
							
							
							
							
							
							
							
							
							
							
							
							
							
							
							
							
							
							
							
							
							
							
							
							
							
							
							
							
							
							
							
							
							
							
							
							
							
							
							
							
							
							
							
							
							
							
							
							
							
							
							
							
							
							
							
							
							
							
							
							
							
							
							
							
							
							
							
							
							
							
							
							
							
							
							
							
							
							
							
							
							
							
							
							
							
							
							
							
							
							
							
							
							
							
							
							
							

							
							
							
							
							
							
							
							
							
							
							
							
							
							
							
							
							
							
							
							
							
							
							
							
							
							
							
							
							
							
							
							
							
							
							
							
							
							
							
							
							
							
							
							
							
							
							
							
							
							
							
							
							
							
							
							
							
							
							
							
							
							
							
							
							
							
							
							
							
							
							
							
							
							
							
							
							
							
							
							
							
							
							
							
							
							
							
							
							
							
							
							
							
							
							
							
							
							
							
							
							
							
							
							
							
							
							
							
							
							
							
							
							
							
							
							
							
							
							
							
							
							
							
							
							
							
							
							
							
							
							
							
							
							
							
							
							
							
							
							
							
							
							
							
							
							
							
							
							
							
							
							

							
							
							
							
							
							
							
							
							
							
							
							
							
							
							
							
							
							
							
							
							
							
							
							
							
							
							
							
							
							
							
							
							
							
							
							
							
							
							
							
							
							
							
							
							
							
							
							
							
							
							
							
							
							
							
							
							
							
							
							
							
							
							
							
							
							
							
							

							
							
							
							
							
							
							
							
							
							
							
							
							
							
							
							
							
							
							
							
							
							
							
							
							
							
							

 


		
		
		
		
		
		
		
